# Complete sequence analysis of the genome of the bacterium *Mycoplasma pneumoniae*

Ralf Himmelreich, Helmut Hilbert<sup>+</sup>, Helga Plagens, Elsbeth Pirkl, Bi-Chen Li<sup>§</sup> and Richard Herrmann\*

Zentrum für Molekulare Biologie Heidelberg, Mikrobiologie, Universität Heidelberg, 69120 Heidelberg, Germany

Received August 22, 1996; Revised and Accepted October 10, 1996

DDBJ/EMBL/GenBank accession no. U00089

## ABSTRACT

The entire genome of the bacterium *Mycoplasma pneumoniae* M129 has been sequenced. It has a size of 816 394 base pairs with an average G+C content of 40.0 mol%. We predict 677 open reading frames (ORFs) and 39 genes coding for various RNA species. Of the predicted ORFs, 75.9% showed significant similarity to genes/proteins of other organisms while only 9.9% did not reveal any significant similarity to gene sequences in databases. This permitted us tentatively to assign a functional classification to a large number of ORFs and to deduce the biochemical and physiological properties of this bacterium. The reduction of the genome size of *M.pneumoniae* during its reductive evolution from ancestral bacteria can be explained by the loss of complete anabolic (e.g. no amino acid synthesis) and metabolic pathways. Therefore, *M.pneumoniae* depends in nature on an obligate parasitic lifestyle which requires the provision of exogenous essential metabolites. All the major classes of cellular processes and metabolic pathways are briefly described. For a number of activities/functions present in *M.pneumoniae* according to experimental evidence, the corresponding genes could not be identified by similarity search. For instance we failed to identify genes/proteins involved in motility, chemotaxis and management of oxidative stress.

## INTRODUCTION

The bacterium *Mycoplasma pneumoniae* has a genome size of ~800 kb and completely lacks a cell wall. The bacterium is surrounded by a cytoplasmic membrane only, which contains cholesterol as an indispensable component. *Mycoplasma pneumoniae* is a human pathogen, causing 'atypical pneumonia' (1) usually in older children and young adults. As a surface parasite, it attaches to the host's respiratory epithelium by means of a differentiated terminal structure termed attachment organelle or tip structure. For a long time, research activities mainly focused on pathogenicity-related topics such as studies on cytoadherence (2), vaccination and diagnosis (3). *Mycoplasma pneumoniae* was not considered as an organism suitable for basic studies partly because of its fastidious growth requirements and partly because

of the lack of established standard genetic tools like conjugation or transformation with self-replicating vectors (4). These disadvantages can be compensated now to a large extent by the methods of molecular biology.

Morowitz pointed out in 1984, that mycoplasmas would be suitable candidates for defining the genetic constitution of a minimal self-replicating cell (5). The advantage of these bacteria for such studies (6,7), mainly due to their small genome size, was so obvious that several initiatives were started to sequence five different mycoplasma genomes: *Mycoplasma genitalium* (8,9), *M.pneumoniae* (10), *Mycoplasma capricolum* (11), *Mycoplasma mycoides* (12) and a species from the related genus *Ureaplasma*, *Ureaplasma urealyticum* (13). So far, only the complete sequence of the *M.genitalium* genome has been published (9) which, with 580 070 bp, is the smallest bacterial genome known so far. In the genus *Mycoplasma*, *M.pneumoniae* and *M.genitalium* are the closest related species. We report in this publication the complete nucleotide sequence of the genome of *M.pneumoniae*, which thus provides information on a second small bacterial genome. All *M.pneumoniae* genes which had been already sequenced were reanalyzed except for the P1 operon (14). Our sequencing strategy, early results and a detailed description of *M.pneumoniae* as an experimental system have been recently published (10).

## MATERIALS AND METHODS

### Mycoplasma strain

The strain *Mycoplasma pneumoniae* M129 (ATTC 29342) in the 18th broth passage was used to construct an ordered cosmid library containing the complete genome (15). This cosmid library was the basis for the DNA sequence analysis. We selected this specific bacterial strain because it has been used in cytoadherence and pathogenicity studies (2,16,17). The strain in the 20th broth passage was still infectious in hamsters (H. Brunner, unpublished data).

### DNA sequencing

Using the enzymatic dideoxy chain-termination method (18), the sequence data for this study were exclusively generated on a fluorescent-based sequence-gel reader (Model 373A, Applied Biosystems). Sequencing strategies and methods were as described in Hilbert *et al.* (10).

\*To whom correspondence should be addressed. Tel: +49 6221 54 68 27; Fax: +49 6221 54 58 93; Email: r.herrmann@mail.zmbh.uni-heidelberg.de

Present addresses: <sup>+</sup>QIAGEN GmbH, 40724 Hilden, Germany and <sup>§</sup>Cancer Research Center (DKFZ), 69120 Heidelberg, Germany

## Computer assisted analysis

Sequence assembly, map drawing and multiple alignments were done with the *Lasergene* program package (DNA STAR).

Other analyses were performed with the *HUSAR* (Heidelberg Unix Sequence Analysis Resources) program package release 4.0 at the German Cancer Research Center, Heidelberg, Germany. This package is based on the *GCG* program package version Unix-8.1 of the Genetics Computer Group, Wisconsin. For searching the DNA and protein databases [*SWISS-PROT* (19) and *PIR* (20)] the *FASTA* (21) and *BLAST* (22) programs (*BLASTX*, *BLASTN* and *BLASTP*) were used. Conserved motifs in proteins and peptides were identified by using the program *PROSITE* (23). Open reading frames (ORFs) were calculated by the program *FRAMES* allowing AUG (or GUG, UUG) as start codons using the Mycoplasma translation table where UGA codes for tryptophan (24). The G+C content was calculated by the program *WINDOW*. Codon usage was performed with the program *CODONFREQUENCY*.

The programs *TopPred 1.1.1* (Manuel G. Carlos, Ecole Normale Supérieure, Laboratoire de Genetique Moleculaire, Paris, France) and *PSORT* (25) (<http://psort.nibb.ac.jp/>) were used for the prediction of transmembrane domains and the membrane topology of proteins.

Each ORF analysis is accessible as a *File Maker Pro* (Claris) database which can be accessed at our world wide web (www) site ([http://zmbh.uni-heidelberg.de/M\\_pneumoniae](http://zmbh.uni-heidelberg.de/M_pneumoniae)). It contains, besides genome and cosmid position of each ORF/gene, data about expression, availability of antibodies, comments, literature, prosite patterns, amino acid composition and database search homology scores. All the annotations in this paper were done on the basis of the highest score values.

## Accession number

The complete *M.pneumoniae* sequence has been annotated in GenBank (NCBI) with the accession number U00089.

## RESULTS AND DISCUSSION

The strategy and methodology for sequencing the complete genome has been described by us recently (10). A total of 2 415 202 nucleotides primary sequence data were provided by 6385 sequencing reactions. Each strand of the genome was completely sequenced at least once. The direct sequencing approach, combining primer walking with a limited shotgun strategy based on a complete cosmid and plasmid library considerably facilitated the assembly of the individual sequences to the entire genome sequence. The average redundancy of the sequencing was 2.95 (calculated for both strands). This very low redundancy was achieved by the use of 5095 oligonucleotides.

The complete *M.pneumoniae* genome has a size of 816 394 bp and a G+C content of 40.0 mol%. Altogether 677 open reading frames (ORFs) and 39 genes coding for various RNA species were predicted. All ORFs were sorted into categories according to their proposed functions (Tables 1 and 2; Fig. 1). Only 333

ORFs (49.2%) were functionally assigned, based on significant sequence similarities to genes or proteins from other organisms with known functions (e.g. ribosomal proteins) or at least known categories of function (e.g. proteins involved in cytoadherence). Significant similarities to proteins without known function from other bacteria, mostly *M.genitalium*, were shown for 181 proposed ORFs (26.7%). We also included in this group those *M.pneumoniae* proteins which were identified in protein extracts of *M.pneumoniae* by monospecific antibodies or by the N-terminal amino acid sequences of enriched proteins (26,27). The group of ORFs without significant similarity or without indication for their *in vivo* expression comprised 109 members (16.1%); 42 of them carry characteristic motifs, which are not sufficient for defining a function. Examples of such motifs are the leucine zipper (29 cases; referred to all predicted ORFs), the typical prokaryotic lipoprotein sequence pattern (46 cases) or ATP- and GTP-binding sites (73 cases). In addition all predicted gene products were analyzed by programs for structure predictions, e.g. coiled/coiled structures (29 cases) or transmembrane segments (275 cases). The latter result supports the analysis of cell fractionation experiments which indicate that the membrane fraction contains ~50% of the total proteins estimated by SDS-PAGE. About 8% of the genome is composed of repetitive DNA elements RepMP1, RepMP2/3, RepMP4 and RepMP5, while only 67 of all predicted ORFs (9.9%) code for a product without any similarity to a known RNA or protein.

Finally, 58 gene families were defined comprising 298 proteins with at least two but frequently with more paralogs; these are proteins with similarities within the same species (see www pages).

The proposed ORFs are not equally distributed over the genome. A lower coding density coincides with regions of lower or higher G+C content than the average. There are regions with a G+C content of up to 56 mol%. These regions code almost exclusively for the gene P1 and gene ORF6 of the P1 operon, the repetitive DNA sequences RepMP4, RepMP2/3, RepMP5 and tRNAs (for details see www pages).

The P1 protein, the main adhesin, is essential for adherence of *M.pneumoniae* to its host cell (28) and the ORF6 gene product which is only found as a cleavage product, namely a 40 and 90 kDa protein, instead of the expected 130 kDa protein, is involved in an as yet unknown manner in cytoadherence (14). Gene P1 contains a copy each of RepMP2/3 and RepMP4 and gene ORF6 one of RepMP5 (29). In addition, several copies of each of these repetitive DNA sequences can easily be recognized by their relative high G+C content (Fig. 2).

At the other extreme is the proposed origin of replication around nucleotide position 205 000 (pcosMPK05, dnaA region), with a G+C content of only 26 mol% (10).

Other regions with a low G+C content do not show a similar obvious coding pattern, but proposed ORFs coding for lipoproteins or the hsd modification/restriction system are frequently located in these regions.

The total length of all coding regions is 724 174 bp. The average coding density of 88.7% was calculated for the *M.pneumoniae* genome which gives an average gene size of 1011 bp. Similar

**Figure 1.** (Following two pages) The gene map of the complete *M.pneumoniae* genome. The arrows indicate the position and the size of the predicted ORFs. The colour refers to the functional category in which the ORFs are sorted. The complete name of an ORF can be deduced by the cosmid name above the horizontal scale-line and the number below the arrows (e.g. the ORF name of the first complete arrow in this figure is E07\_orf1113). Rectangles above the scale-line indicate the size and the position of different repetitive DNA sequences (see also Table 4).





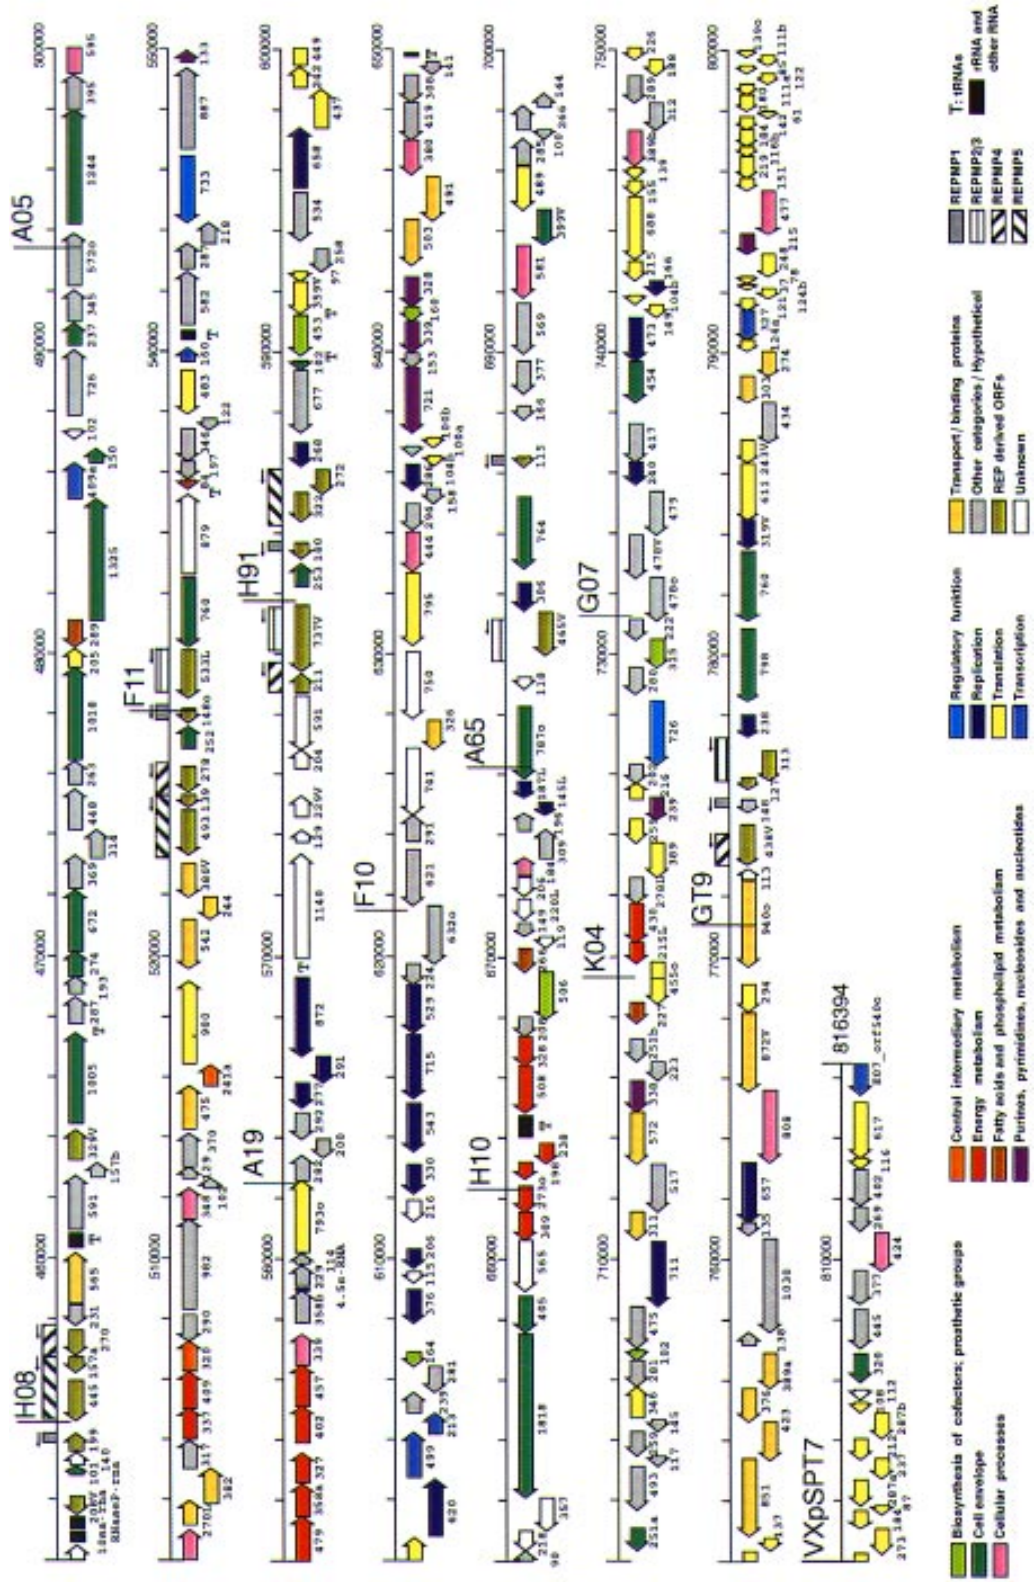

**Table 1.** Predicted functions and classification of all *M.pneumoniae* ORFs

|                                                                                            |                |                                                               |
|--------------------------------------------------------------------------------------------|----------------|---------------------------------------------------------------|
| <b>* Biosynthesis of cofactors, prosthetic groups and carrier - Folic acid [5]</b>         |                |                                                               |
| F10_orf160                                                                                 | *MG228         | dihydrofolate reductase (dhfr); LACLA                         |
| H10_orf506                                                                                 | MG213          | dihydrofolate reductase (dfr) homolog protein; ENTFC          |
| D12_orf269                                                                                 | MG013          | 5,10-methylene-tetrahydrofolate dehydrogenase (mdh1); HAEIN   |
| D02_orf406                                                                                 | MG394          | serine hydroxymethyltransferase (glyA); ACTAC                 |
| H91_orf164                                                                                 | MG245          | 5-formyl tetrahydrofolate cyclo-ligase (HD858) homolog; HAEIN |
| <b>* Biosynthesis of cofactors, prosthetic groups and carrier - Heme and porphyrin [1]</b> |                |                                                               |
| H91_orf453                                                                                 | MG259          | possible protoporphyrinogen oxidase (hemK); ECOLI             |
| <b>* Biosynthesis of cofactors, prosthetic groups and carrier - Thioredoxin [2]</b>        |                |                                                               |
| A65_orf102                                                                                 | MG124          | thioredoxin (trx); YEAST                                      |
| K04_orf315                                                                                 | MG102          | thioredoxin reductase (trxB); EUBAC                           |
| <b>* Cell envelope - Membranes, lipoproteins and porines [42]</b>                          |                |                                                               |
| A05_orf1244                                                                                | MG307          | putative lipoprotein, MG307 homolog, MYCGE                    |
| A05_orf252                                                                                 | MG440          | putative lipoprotein, MG440 homolog, MYCGE                    |
| A65_orf251a                                                                                | MG440          | putative lipoprotein, MG440 homolog, MYCGE                    |
| A65_orf787o                                                                                | MG260          | putative lipoprotein, MG260 homolog, MYCGE                    |
| A65_orf794                                                                                 | MG260 (MG185)  | putative lipoprotein, MG260 homolog, MYCGE                    |
| D02_orf217L                                                                                | MG395 (MG068)  | putative lipoprotein, MG395 homolog, MYCGE                    |
| D02_orf302                                                                                 | MG068 (MG395)  | putative lipoprotein, MG068 homolog, MYCGE                    |
| D02_orf439                                                                                 | MG068 (MG395)  | putative lipoprotein, MG068 homolog, MYCGE                    |
| D02_orf521                                                                                 | MG395 (MG068)  | putative lipoprotein, MG395 homolog, MYCGE                    |
| D02_orf531                                                                                 | MG395 (MG068)  | putative lipoprotein, MG395 homolog, MYCGE                    |
| D09_orf123                                                                                 | -              | putative lipoprotein                                          |
| D09_orf485                                                                                 | MG045          | putative lipoprotein, MG045 homolog, MYCGE                    |
| D09_orf657                                                                                 | MG040          | putative lipoprotein, MG040 homolog, MYCGE                    |
| D12_orf231                                                                                 | -              | putative lipoprotein                                          |
| E07_orf301                                                                                 | MG186          | putative lipoprotein, MG186 homolog, MYCGE                    |
| E07_orf794                                                                                 | MG260 (MG185)  | putative lipoprotein, MG260 homolog, MYCGE                    |
| B09_orf101                                                                                 | marginal MG440 | putative lipoprotein                                          |
| B09_orf129                                                                                 | -              | putative lipoprotein                                          |
| B09_orf276                                                                                 | MG440          | putative lipoprotein, MG440 homolog, MYCGE                    |
| B09_orf277                                                                                 | MG440          | putative lipoprotein, MG440 homolog, MYCGE                    |
| B09_orf279                                                                                 | MG439          | putative lipoprotein, MG439 homolog, MYCGE                    |
| E09_orf283a                                                                                | MG439          | putative lipoprotein, MG439 homolog, MYCGE                    |
| E09_orf283b                                                                                | MG439          | putative lipoprotein, MG439 homolog, MYCGE                    |
| E09_orf290                                                                                 | MG439          | putative lipoprotein, MG439 homolog, MYCGE                    |
| B09_orf300                                                                                 | MG439          | putative lipoprotein, MG439 homolog, MYCGE                    |
| F11_orf760                                                                                 | MG260 (MG185)  | putative lipoprotein, MG260 homolog, MYCGE                    |
| G07_orf454                                                                                 | MG095          | putative lipoprotein, MG095 homolog, MYCGE                    |
| G12_orf305                                                                                 | MG348          | putative lipoprotein, MG348 homolog, MYCGE                    |
| GT9_orf760                                                                                 | MG185          | putative lipoprotein, MG185 homolog, MYCGE                    |
| GT9_orf798                                                                                 | MG260          | putative lipoprotein, MG260 homolog, MYCGE                    |
| H08_orf1005                                                                                | MG321          | putative lipoprotein, MG321 homolog, MYCGE                    |
| H08_orf1325                                                                                | MG309          | putative lipoprotein, MG309 homolog, MYCGE                    |
| H08_orf150                                                                                 | MG307          | putative lipoprotein, MG307 homolog, MYCGE                    |
| H08_orf237                                                                                 | MG307          | putative lipoprotein, MG307 homolog, MYCGE                    |
| H91_orf102                                                                                 | MG260          | putative lipoprotein, MG260 homolog, MYCGE                    |
| H91_orf253                                                                                 | -              | putative lipoprotein                                          |
| P01_orf101                                                                                 | -              | putative lipoprotein                                          |
| P02_orf1300                                                                                | MG338          | putative lipoprotein, MG338 homolog, MYCGE                    |
| P02_orf793                                                                                 | MG260          | putative lipoprotein, MG260 homolog, MYCGE                    |
| R02_orf533                                                                                 | MG067          | putative lipoprotein, MG067 homolog, MYCGE                    |
| R02_orf541                                                                                 | MG260          | putative lipoprotein, MG260 homolog, MYCGE                    |
| VXpSPT7_orf320                                                                             | MG149          | putative lipoprotein, MG149 homolog, MYCGE                    |
| <b>* Cell envelope - Surface structures and cytodherence [8]</b>                           |                |                                                               |
| E07_orf1627                                                                                | MG191 (MG192)  | adhesin P1 (orf5, P1 operon); MYCPN                           |
| E07_orf1218                                                                                | MG192 (MG191)  | hypothetical 130K protein (orf6, P1 operon); MYCPN            |
| H08_orf274                                                                                 | MG318          | 30K adhesin-related protein; MYCPN                            |
| H08_orf1018                                                                                | MG312          | cytodherence accessory protein (hmsw1); MYCPN                 |
| F10_orf1818                                                                                | MG218          | cytodherence accessory protein (hmsw2); MYCPN                 |
| H08_orf672                                                                                 | MG317          | cytodherence accessory protein (hmsw3); MYCPN                 |
| D02_orf1036o                                                                               | MG386          | protein P200; MYCPN                                           |
| F10_orf405                                                                                 | MG217          | protein P65; MYCPN                                            |
| <b>* Cell envelope - Surfaces polysaccharides, lipopolysaccharides and antigens [4]</b>    |                |                                                               |
| A65_orf399V                                                                                | MG137          | YefE protein homolog; ECOLI                                   |
| B01_orf299V                                                                                | MG025          | TrsB protein; YEREN                                           |
| D09_orf299                                                                                 | MG060          | hypothetical protein YWDF homolog; BACSU                      |
| G12_orf282b                                                                                | MG356          | LicA protein homolog; HAEIN                                   |
| <b>* Cellular processes - Cell division [2]</b>                                            |                |                                                               |
| F10_orf380                                                                                 | MG224          | cell division protein (ftsZ); BACSU                           |
| K05_orf709                                                                                 | MG457          | cell division protein (ftsH); BACSU                           |
| <b>* Cellular processes - Cell killing [1]</b>                                             |                |                                                               |
| VXpSPT7_orf424                                                                             | MG146          | hemolysin (hlyC) homolog protein; HAEIN                       |
| <b>* Cellular processes - Chaperones [7]</b>                                               |                |                                                               |
| A05_orf595                                                                                 | MG305          | heat shock protein DnaK, ERYRH                                |



Table 1. Continued

|                                                                          |       |                                                                 |
|--------------------------------------------------------------------------|-------|-----------------------------------------------------------------|
| C09_orf217                                                               | MG201 | heat shock protein GrpE; HAEIN                                  |
| D02_orf116                                                               | MG393 | heat shock protein GroES; BACSU                                 |
| D02_orf543                                                               | MG392 | heat shock protein GroEL; BACSU                                 |
| D12_orf390b                                                              | MG019 | heat shock protein DnaJ; BACSU                                  |
| C09_orf910                                                               | MG200 | DnaJ homolog protein; MYCCA                                     |
| K05_orf309                                                               | MG002 | DnaJ homolog protein; YEAST                                     |
| <b>* Cellular processes - Detoxification [1]</b>                         |       |                                                                 |
| D12_orf442                                                               | MG008 | possible thiophene and furan oxidation protein (tdhF); BACSU    |
| <b>* Cellular processes - Protein and peptide secretion [9]</b>          |       |                                                                 |
| A05_orf348                                                               | MG297 | cell division protein (ftsY); ECOLI                             |
| D09_orf450                                                               | MG048 | signal recognition particle protein (fih); MYCME                |
| G07_orf808                                                               | MG072 | preprotein translocase (secA); BACSU                            |
| GT9_orf477                                                               | MG170 | preprotein translocase secY subunit; MYCCA                      |
| A65_orf581                                                               | MG138 | GTP-binding membrane protein (lepA); HAEIN                      |
| F10_orf444                                                               | MG238 | trigger factor (tig); HAEIN                                     |
| H10_orf184                                                               | MG210 | prolipoprotein signal peptidase (lsp); STACA                    |
| G07_orf389b                                                              | MG086 | prolipoprotein diacylglycerol transferase (lgt); ECOLI          |
| F11_orf339                                                               | MG270 | lipote protein ligase (lplA); ECOLI                             |
| <b>* Central intermediary metabolism - Other [5]</b>                     |       |                                                                 |
| A05_orf241a                                                              | MG293 | glycerophosphoryl diester phosphodiesterase (glpQ); BACSU       |
| A05_orf320                                                               | MG299 | phosphotransacetylase (pta); BACSU                              |
| D09_orf508                                                               | MG038 | glycerol kinase (glpK); HAEIN                                   |
| G12_orf390                                                               | MG357 | acetate kinase (ackA); BACSU                                    |
| H03_orf237                                                               | MG385 | glycerophosphoryl diester phosphodiesterase (glpQ); STAAU       |
| <b>* Central intermediary metabolism - Phosphorous compounds [1]</b>     |       |                                                                 |
| G12_orf184                                                               | MG351 | inorganic pyrophosphatase (ppa); THEAC                          |
| <b>* Energy metabolism - Aerobic [3]</b>                                 |       |                                                                 |
| K05_orf312                                                               | MG460 | L-lactate dehydrogenase (ldh); MYCHY                            |
| D09_orf384                                                               | MG039 | aerobic glycerol-3-phosphate dehydrogenase (glpD); ECOLI        |
| F11_orf479                                                               | MG275 | NADH oxidase (nox); ENTFA                                       |
| <b>* Energy metabolism - Amino acids and amines [5]</b>                  |       |                                                                 |
| F10_orf309                                                               | -     | carbamate kinase (EC 2.7.2.2) (accC); PSEAE                     |
| H03_orf438                                                               | -     | arginine deiminase (arcA); PSEPU                                |
| H10_orf198                                                               | -     | arginine deiminase (arcA); MYCCA                                |
| H10_orf238                                                               | -     | arginine deiminase (arcA); MYCCA                                |
| H10_orf273b                                                              | -     | ornithine carbamoyl transferase (otc1); ECOLI                   |
| <b>* Energy metabolism - Anaerobic [1]</b>                               |       |                                                                 |
| H03_orf351                                                               | -     | NADP-dependent alcohol dehydrogenase (adh); THEBR               |
| <b>* Energy metabolism - ATP-proton motive force interconversion [9]</b> |       |                                                                 |
| C12_orf293b                                                              | MG405 | ATP synthase A chain (atpB); MYCGA                              |
| D02_orf207                                                               | MG403 | ATP synthase B chain (atpF); MYCGA                              |
| D02_orf105                                                               | MG404 | ATP synthase C chain (atpE); MYCGA                              |
| C12_orf157L                                                              | MG406 | ATP synthase protein I (atpI); MYCGA                            |
| D02_orf518                                                               | MG401 | ATP synthase alpha chain (atpA); MYCGA                          |
| D02_orf475                                                               | MG399 | ATP synthase beta chain (atpD); MYCGA                           |
| D02_orf279                                                               | MG400 | ATP synthase gamma chain (atpG); MYCGA                          |
| D02_orf178                                                               | MG402 | ATP synthase delta chain (atpH); MYCGA                          |
| D02_orf133a                                                              | MG398 | ATP synthase epsilon chain (atpC); MYCGA                        |
| <b>* Energy metabolism - Glycolysis [10]</b>                             |       |                                                                 |
| A05_orf337                                                               | MG301 | glyceraldehyde-3-phosphate dehydrogenase(gap); CLOPA            |
| A05_orf409                                                               | MG300 | phosphoglycerate kinase (pgk); THEMA                            |
| B01_orf288                                                               | MG023 | fructose-bisphosphate aldolase (tst); BACSU                     |
| C12_orf244                                                               | MG431 | triosephosphate isomerase (tim); ECOLI                          |
| C12_orf456                                                               | MG407 | enolase (eno) (EC 4.2.1.11); PLAPA                              |
| C12_orf508                                                               | MG430 | phosphoglycerate mutase (pgm); BACSU                            |
| H10_orf528                                                               | MG215 | 6-phosphofructokinase (pfk); ECOLI                              |
| H10_orf508                                                               | MG216 | pyruvate kinase (pyk); LACLA                                    |
| K04_orf430                                                               | MG111 | phosphoglucose isomerase B (pgiB); BACST                        |
| R02_orf300                                                               | MG063 | 1-phosphofructokinase (fruK); HAEIN                             |
| <b>* Energy metabolism - Pentose Phosphate pathway [2]</b>               |       |                                                                 |
| P02_orf242                                                               | -     | L-ribulose-5-phosphate 4-epimerase (ariD); ECOLI                |
| R02_orf548                                                               | MG066 | transketolase 1 (TK 1; tk1B); RHOSH                             |
| <b>* Energy metabolism - Pyruvate DHase [4]</b>                          |       |                                                                 |
| F11_orf327                                                               | MG273 | pyruvate dehydrogenase E1-beta subunit (pdhB); ACHLA            |
| F11_orf358a                                                              | MG274 | pyruvate dehydrogenase E1-alpha subunit (pdhA); ACHLA           |
| F11_orf402                                                               | MG272 | dihydrolipoamide acetyltransferase component (E2) (pdhC); ACHLA |
| F11_orf457                                                               | MG271 | dihydrolipoamide dehydrogenase (pdhD); BACST                    |
| <b>* Energy metabolism - Sugars [5]</b>                                  |       |                                                                 |
| D02_orf132                                                               | MG396 | galactose-6-phosphate isomerase subunit (LacA); STRMU           |
| D09_orf224                                                               | MG050 | deoxyribose-phosphate aldolase (dcaC); MYCPN                    |
| D09_orf554                                                               | MG053 | phosphomannomutase (cpsG); MYCPI                                |
| E09_orf364                                                               | -     | mannitol-1-phosphate 5-dehydrogenase (EC 1.1.1.17)(mfd); STRMU  |

Table 1. *Continued*

|                                                                                                                |                     |                                                                  |
|----------------------------------------------------------------------------------------------------------------|---------------------|------------------------------------------------------------------|
| <b>• Fatty acid and phospholipid metabolism [9]</b>                                                            |                     |                                                                  |
| A65_orf227                                                                                                     | MG114               | phosphatidylglycerophosphate synthase (pgsA); HAEIN              |
| C09_orf600                                                                                                     | -                   | carnitine palmitoyltransferase II precursor(cpt2); HUMAN         |
| E30_orf395                                                                                                     | MG437               | CDP-diglyceride synthetase (cdsA); HAEIN                         |
| F11_orf84                                                                                                      | MG287               | (acyl carrier protein; STRGA)                                    |
| G12_orf272V                                                                                                    | MG344               | triacylglycerol lipase (lip) 3; MYCMY                            |
| G12_orf328a                                                                                                    | MG368               | fatty acid/phospholipid synthesis protein (plsX); ECOLI          |
| H08_orf289                                                                                                     | MG310               | triacylglycerol lipase (lip) 3; Mycoplasma sp                    |
| H10_orf266                                                                                                     | MG212               | 1-acyl-sn-glycerol-3-phosphate acyltransferase (plsB); YEAST     |
| P01_orf268                                                                                                     | MG327               | triacylglycerol lipase (lip) 2; MYCMY                            |
| <b>• Purines, pyrimidines, nucleosides and nucleotides - 2'-Deoxyribonucleotide metabolism [3]</b>             |                     |                                                                  |
| F10_orf328                                                                                                     | MG227               | thymidylate synthase (thyA); STAAU                               |
| F10_orf339                                                                                                     | MG229               | ribonucleotide reductase 2 (nrdF); SALT                          |
| F10_orf721                                                                                                     | MG231               | ribonucleoside-diphosphate reductase (nrdE); SALT                |
| <b>• Purines, pyrimidines, nucleosides and nucleotides - Nucleotide and nucleoside interconversions [2]</b>    |                     |                                                                  |
| C12_orf235                                                                                                     | MG434               | uridylyate kinase (pyrH); ECOLI                                  |
| H03_orf213                                                                                                     | MG382               | uridine kinase (udk); HAEIN                                      |
| <b>• Purines, pyrimidines, nucleosides and nucleotides - Purine ribonucleotide biosynthesis [3]</b>            |                     |                                                                  |
| D09_orf388                                                                                                     | MG058               | phosphoribosylpyrophosphate synthetase (prs); SYN                |
| GT9_orf215                                                                                                     | MG171               | adenylate kinase (adk); BACST                                    |
| K04_orf239                                                                                                     | MG107               | 5'guanylate kinase (gmK); HAEIN                                  |
| <b>• Purines, pyrimidines, nucleosides and nucleotides - Salvage of nucleosides and nucleotides [9]</b>        |                     |                                                                  |
| B01_orf178                                                                                                     | MG030               | uracil phosphoribosyltransferase (upp); STRSL                    |
| B01_orf191                                                                                                     | MG034               | thymidine kinase (tdk); BACSU                                    |
| D09_orf133                                                                                                     | MG052               | cytidine deaminase (cdd); MYCPI                                  |
| D09_orf238                                                                                                     | MG049               | purine-nucleoside phosphorylase (deoD); ECOLI                    |
| D09_orf421                                                                                                     | MG051               | thymidine phosphorylase (deoA); MYCPI                            |
| F11_orf133                                                                                                     | MG276               | adenine phosphoribosyltransferase (apt); HAEIN                   |
| K05_orf175                                                                                                     | MG458               | hypoxanthine-guanine phosphoribosyltransferase (HPT); LACLA      |
| P01_orf217                                                                                                     | MG330               | cytidylate kinase (cmk); BACSU                                   |
| D12_orf210                                                                                                     | MG006               | thymidylate kinase (CDC8) homolog; MYCGE                         |
| <b>• Purines, pyrimidines, nucleosides and nucleotides - Sugar-nucleotide biosynthesis and conversions [2]</b> |                     |                                                                  |
| A65_orf338                                                                                                     | MG118               | UDP-glucose 4-epimerase (gale); STRTR                            |
| K05_orf291                                                                                                     | MG453               | UDP-glucose pyrophosphorylase (gtaB); BACSU                      |
| <b>• Pyridine nucleotide synthesis [1]</b>                                                                     |                     |                                                                  |
| H03_orf248                                                                                                     | MG383               | probable NH(3)-dependent NAD(+) synthetase (outB); BACSU         |
| <b>• Regulatory function [8]</b>                                                                               |                     |                                                                  |
| B01_orf362                                                                                                     | MG024               | hypothetical protein (yjaF) homolog; BACSU                       |
| C09_orf351                                                                                                     | MG205               | protein hrcA homolog; BACSU                                      |
| D02_orf291                                                                                                     | MG387               | GTP-binding protein era homolog; STRMU                           |
| F11_orf733                                                                                                     | MG278 (MG376)       | stringent response protein SpoT; ECOLI                           |
| H03_orf433                                                                                                     | MG384               | GTP-binding protein (obg); BACSU                                 |
| K04_orf726                                                                                                     | MG104               | virulence associated protein homolog (vacB); HAEIN               |
| P01_orf193                                                                                                     | MG335               | hypothetical protein YihA (era like) homolog; ECOLI              |
| P01_orf292                                                                                                     | MG329               | hypothetical protein HI0136 (era like) homolog; HAEIN            |
| <b>• Replication - DNA replication, restriction, modification, recombination and repair [46]</b>               |                     |                                                                  |
| A65_orf711                                                                                                     | MG122               | DNA topoisomerase I (topA); BACSU                                |
| A19_orf291                                                                                                     | MG262               | DNA polymerase I (polI, 5'-3' exonuclease) homolog; STRPN        |
| A19_orf872                                                                                                     | MG261               | DNA polymerase III alpha subunit (dnaE); HAEIN                   |
| B01_orf1443                                                                                                    | MG031               | DNA polymerase III (dnaE) alpha chain (3'-5' exonuclease); BACSU |
| K05_orf380                                                                                                     | MG001               | DNA polymerase III beta subunit (dnaN); STAAU                    |
| D12_orf253                                                                                                     | MG007               | DNA polymerase III subunit delta' (holB); ECOLI                  |
| C12_orf681                                                                                                     | MG420(C-Term:MG419) | DNA polymerase III subunit gamma and tau (dnaX); ECOLI           |
| G07_orf473                                                                                                     | MG094               | replicative DNA helicase (dnaC); BACSU                           |
| H91_orf620                                                                                                     | MG250               | DNA primase (dnaG); BACSU                                        |
| D12_orf212                                                                                                     | MG010               | DNA primase motif (dnaG); CLOAB                                  |
| H91_orf658                                                                                                     | MG254               | DNA ligase (lig); ECOLI                                          |
| G07_orf166                                                                                                     | MG091               | single-stranded DNA binding protein (ssb); HAEIN                 |
| K05_orf439                                                                                                     | MG469               | chromosomal replication initiator protein (dnaA); MYCCA          |
| P02_orf336                                                                                                     | MG339               | recombination protein (recA); STAAU                              |
| C09_orf635                                                                                                     | MG203               | topoisomerase IV subunit B (parE); BACSU                         |
| C09_orf789                                                                                                     | MG204               | topoisomerase IV subunit A (parC); BACSU                         |
| K05_orf650                                                                                                     | MG003               | DNA gyrase subunit B (gyrB); MYCPN                               |
| K05_orf839o                                                                                                    | MG004               | DNA gyrase subunit A (gyrA); STAAU                               |
| G12_orf206                                                                                                     | MG358               | Holliday junction DNA helicase (ruvA); ECOLI                     |
| G12_orf307                                                                                                     | MG359               | Holliday junction DNA helicase (ruvB); HAEIN                     |
| H91_orf715                                                                                                     | MG244               | DNA helicase II (mutB1); HAEIN                                   |
| H91_orf529                                                                                                     | MG244               | DNA helicase perA homolog; STAAU                                 |
| F10_orf286                                                                                                     | MG235               | endonuclease IV (nfo); ECOLI                                     |
| C12_orf948L                                                                                                    | MG421               | excinuclease ABC subunit A (uvrA); ECOLI                         |
| G07_orf657                                                                                                     | MG073               | excinuclease ABC subunit B (uvrB); ECOLI                         |
| C09_orf586L                                                                                                    | MG206               | excinuclease ABC subunit C (uvrC); BACSU                         |
| G12_orf412                                                                                                     | MG360               | UV protection protein (mucB); ECOLI                              |
| A19_orf277                                                                                                     | MG(M2)              | formamidopyrimidine-DNA glycosylase (fpg); BACFI                 |
| A65_orf306                                                                                                     | -                   | PrrB homolog protein; ECOLI                                      |

Table 1. Continued

|                                                                                 |       |                                                                                  |
|---------------------------------------------------------------------------------|-------|----------------------------------------------------------------------------------|
| D09_orf383                                                                      | MG047 | S-adenosylmethionine synthetase 2 (metX); ECOLI                                  |
| G07_orf240                                                                      | MG097 | uracil DNA glycosylase (ung); ECOLI                                              |
| C12_orf249                                                                      | -     | restriction-modification enzyme subunit S1B (hsdS); MYCPU                        |
| GT9_orf238                                                                      | -     | type I restriction enzyme <i>ecokI</i> specificity protein (hsdS) homolog; HAEIN |
| GT9_orf319V                                                                     | MG184 | adenine-specific methyltransferase <i>EcoRI</i> (mteI); ECOLI                    |
| H03_orf191                                                                      | MG380 | glucose inhibited division protein (gidB); ECOLI                                 |
| H03_orf612                                                                      | MG379 | glucose inhibited division protein (gidA); ECOLI                                 |
| H10_orf145L                                                                     | -     | type I restriction enzyme <i>ecokI</i> specificity protein (hsdS) homolog; HAEIN |
| H10_orf187V                                                                     | -     | HsdS1B protein homolog; MYCPU                                                    |
| H91_orf206                                                                      | -     | Type I restriction enzyme (hsdR) homolog; ECOLI                                  |
| H91_orf268                                                                      | -     | type I restriction enzyme <i>ecokI</i> specificity protein (hsdS) homolog; HAEIN |
| H91_orf330                                                                      | -     | type I restriction enzyme <i>ecokI</i> specificity protein (hsdS) homolog; HAEIN |
| H91_orf376                                                                      | -     | Type I restriction enzyme (hsdR) homolog; ECOLI                                  |
| H91_orf543                                                                      | -     | type I restriction enzyme (hsdM); ECOLI                                          |
| P02_orf363V                                                                     | -     | type I restriction enzyme <i>ecokI</i> specificity protein (hsdS) homolog; HAEIN |
| R02_orf335                                                                      | -     | type I restriction enzyme <i>ecokI</i> specificity protein (hsdS) homolog; HAEIN |
| E30_orf375                                                                      | MG438 | MG438 homolog, MYCGE                                                             |
| <b>• Transcription - Degradation of RNA [2]</b>                                 |       |                                                                                  |
| G12_orf282a                                                                     | MG367 | ribonuclease III (mc); ECOLI                                                     |
| K05_orf118V                                                                     | MG465 | RNaseP C5 chain (mpA); MYCCA                                                     |
| <b>• Transcription - RNA synthesis, modification and DNA transcription [11]</b> |       |                                                                                  |
| GT9_orf327                                                                      | MG177 | RNA polymerase alpha core subunit (rpoA); BACSU                                  |
| G12_orf1391o                                                                    | MG341 | RNA polymerase beta subunit (rpoB); BACSU                                        |
| P04_orf1290                                                                     | MG340 | DNA-directed RNA polymerase beta' chain (rpoC); THEMA                            |
| B01_orf146                                                                      | MG022 | DNA-directed RNA polymerase delta subunit (rpoE); BACSU                          |
| H91_orf499                                                                      | MG249 | RNA polymerase sigma-A factor (sigA); BACSU                                      |
| F11_orf160                                                                      | MG282 | transcription elongation factor (greA); RICPR                                    |
| D09_orf320                                                                      | MG054 | transcription antitermination factor (nusG); BACSU                               |
| E07_orf540o                                                                     | MG141 | N-utilization substance protein A homolog (nusA); BACSU                          |
| C12_orf450                                                                      | MG425 | ATP-dependent RNA helicase (deaD); HAEIN                                         |
| H08_orf409                                                                      | MG308 | ATP-dependent RNA helicase (deaD); ECOLI                                         |
| D12_orf1030                                                                     | MG018 | hypothetical helicase Yb95 homolog; YEAST                                        |
| <b>• Translation - Amino acyl tRNA synthetases and tRNA modification [24]</b>   |       |                                                                                  |
| A05_orf900                                                                      | MG292 | alanyl-tRNA synthetase (alaS); ECOLI                                             |
| H03_orf537                                                                      | MG378 | arginyl-tRNA synthetase (argS); BRELA                                            |
| K04_orf455o                                                                     | MG113 | asparaginyl-tRNA synthetase (asnS); ECOLI                                        |
| D09_orf557                                                                      | MG036 | aspartyl-tRNA synthetase (aspS); THEAQ                                           |
| H91_orf437                                                                      | MG253 | cysteinyl-tRNA synthetase (cysS); BACSU                                          |
| K05_orf484                                                                      | MG462 | glutamyl-tRNA synthetase (gluX); BACST                                           |
| H91_orf449                                                                      | MG251 | glycyl-tRNA synthetase (grs1); YEAST                                             |
| B01_orf414o                                                                     | MG035 | histidyl-tRNA synthetase (hisS); STREQ                                           |
| G12_orf861                                                                      | MG345 | isoleucine-tRNA ligase (ileS); STAAU                                             |
| F11_orf793o                                                                     | MG266 | leucyl-tRNA synthetase (leuS); BACSU                                             |
| A65_orf489                                                                      | MG136 | lysyl-tRNA synthetase (lysS); BACSU                                              |
| G12_orf311                                                                      | MG365 | methionyl-tRNA formyltransferase (fmt); ECOLI                                    |
| B01_orf512                                                                      | MG021 | methionyl-tRNA synthetase (metS); BACST                                          |
| G07_orf188                                                                      | MG083 | peptidyl-tRNA hydrolase homolog (pth); HAEIN                                     |
| C09_orf341                                                                      | MG194 | phenylalanyl-tRNA synthetase alpha-subunit (pheS); BACSU                         |
| C09_orf805                                                                      | MG195 | phenylalanyl-tRNA synthetase beta chain (pheT); BACSU                            |
| GT9_orf243V                                                                     | MG182 | pseudouridylate synthase I (hisT); ECOLI                                         |
| F11_orf483                                                                      | MG283 | putative prolyl-tRNA synthetase (YH10; proS); YEAST                              |
| D12_orf420                                                                      | MG005 | seryl-tRNA synthetase (serS); BACSU                                              |
| G12_orf564                                                                      | MG375 | threonyl-tRNA synthetase (thrSv); BACSU                                          |
| K05_orf210                                                                      | MG445 | tRNA (guanine-N1)-methyltransferase (trmD); HUMAN                                |
| A65_orf346                                                                      | MG126 | tryptophanyl-tRNA synthetase (trpS); HAEIN                                       |
| K05_orf399                                                                      | MG455 | tyrosyl tRNA synthetase (tyrS); BACCA                                            |
| P01_orf838                                                                      | MG334 | valyl-tRNA synthetase (valS); BACST                                              |
| <b>• Translation - Degradation of proteins, peptides and glycopeptides [8]</b>  |       |                                                                                  |
| B01_orf309                                                                      | MG020 | proline iminopeptidase (pip); NEIGO                                              |
| D02_orf445                                                                      | MG391 | nonspecified aminopeptidase; MYCSA                                               |
| D09_orf319                                                                      | MG046 | o-sialoglycoprotein endopeptidase (gcp); PASHA                                   |
| F10_orf795                                                                      | MG239 | ATP-dependent protease (lon); BACSU                                              |
| G12_orf715                                                                      | MG355 | ATP-dependent protease binding subunit (clpB) homolog; HAEIN                     |
| GT9_orf611                                                                      | MG183 | oligoendopeptidase F (pepF); LACLA                                               |
| H03_orf193o                                                                     | MG377 | MG377 homolog (put. zinc protease); MYCGE                                        |
| P01_orf354                                                                      | MG324 | X-Pro dipeptidase (pepX); LACDE                                                  |
| <b>• Translation - Protein modification and translation factors [15]</b>        |       |                                                                                  |
| GT9_orf78                                                                       | MG173 | initiation factor 1 (infA); BACSU                                                |
| VXpSPT7_orf617                                                                  | MG142 | protein synthesis initiation factor 2 (infB); BACST                              |
| C09_orf201                                                                      | MG196 | translation initiation factor IF3 (infC); MYCFE                                  |
| G07_orf688                                                                      | MG089 | elongation factor G (fus); THEAQ                                                 |
| B01_orf190                                                                      | MG026 | elongation factor P (efp) homolog; HAEIN                                         |
| C12_orf298                                                                      | MG433 | elongation factor Ts (tsf); SPICI                                                |
| K05_orf394                                                                      | MG451 | elongation factor TU (tuf); MYCGE                                                |
| H91_orf359V                                                                     | MG258 | peptide chain release factor 1 (RF1; prfA); BACSU                                |
| E30_orf184                                                                      | MG435 | ribosome releasing factor (fir); HAEIN                                           |
| GT9_orf248                                                                      | MG172 | methionine amino peptidase (map); BACSU                                          |
| K04_orf216                                                                      | MG106 | polypeptide deformylase (def); HAEIN                                             |
| K04_orf259                                                                      | MG108 | protein phosphatase 2C homolog; YEAST                                            |



Table 1. *Continued*

|                                                                            |               |                                                                             |
|----------------------------------------------------------------------------|---------------|-----------------------------------------------------------------------------|
| K04_orf389                                                                 | MG109         | probable protein serine/threonine kinase; CAEEL                             |
| K05_orf151                                                                 | MG448         | pilB homolog (fragment); HAEIN                                              |
| C12_orf157                                                                 | MG408         | peptide methionine sulfoxide reductase (pmsR), ECOLI                        |
| • <b>Translation - Ribosomal proteins: synthesis and modification [53]</b> |               |                                                                             |
| G07_orf226                                                                 | MG082         | ribosomal protein L1 (rpL1); BACST                                          |
| VXpSPT7_orf287a                                                            | MG154         | ribosomal protein L2 (rpL2); MYCCA                                          |
| VXpSPT7_orf287b                                                            | MG151         | ribosomal protein L3 (rpL3); MYCCA                                          |
| VXpSPT7_orf212                                                             | MG152         | ribosomal protein L4 (rpL4); MYCCA                                          |
| GT9_orf180b                                                                | MG163         | ribosomal protein L5 (rpL5); HAEIN                                          |
| GT9_orf184                                                                 | MG166         | ribosomal protein L6 (rpL6); MYCCA                                          |
| G12_orf122                                                                 | MG362         | ribosomal protein L7/L12 ('A' type) (rpL7/L12); MICLU                       |
| G07_orf149                                                                 | MG093         | ribosomal protein L9 (rpL9); BACST                                          |
| G12_orf161                                                                 | MG361         | ribosomal protein L10 (rpL10); THEMA                                        |
| G07_orf137                                                                 | MG081         | ribosomal protein L11 (RPL11); THEMA                                        |
| C12_orf146                                                                 | MG418         | ribosomal protein L13 (rpL13); ECOLI                                        |
| GT9_orf122                                                                 | MG161         | ribosomal protein L14 (rpL14); BACST                                        |
| GT9_orf151                                                                 | MG169         | ribosomal protein L15 (rpL15); MYCCA                                        |
| VXpSPT7_orf139a                                                            | MG158         | ribosomal protein L16 (rpL16); MYCCA                                        |
| GT9_orf124a                                                                | MG178         | ribosomal protein L17 (rpL17); BACSU                                        |
| GT9_orf116b                                                                | MG167         | ribosomal protein L18 (rpL18); BACST                                        |
| K05_orf119                                                                 | MG444         | ribosomal protein L19 (rpL19); BACST                                        |
| C09_orf127                                                                 | MG198         | ribosomal protein L20 (rpL20); MYCFE                                        |
| F10_orf100b                                                                | MG232         | ribosomal protein L21 (rpL21); BACSU                                        |
| VXpSPT7_orf184                                                             | MG156         | ribosomal protein L22 (rpL22); HAEIN                                        |
| VXpSPT7_orf237                                                             | MG153         | ribosomal protein L23 (rpL23); THEMA                                        |
| GT9_orf111a                                                                | MG162         | ribosomal protein L24 (rpL24); BACST                                        |
| F10_orf104                                                                 | MG234         | ribosomal protein L27 (rpL27); BACSU                                        |
| C12_orf65                                                                  | MG426         | ribosomal protein L28 (rpL28); BACSU                                        |
| GT9_orf111b                                                                | MG159         | ribosomal protein L29 (rpL29); THEMA                                        |
| H91_orf97                                                                  | MG257         | ribosomal protein L31 (rpL31); ECOLI                                        |
| G12_orf57                                                                  | MG363         | ribosomal protein L32 (rpL32); HAEIN                                        |
| P01_orf53                                                                  | MG325         | ribosomal protein L33 (rpL33); BACST                                        |
| K05_orf48                                                                  | MG466         | ribosomal protein L34 (rpL34); PROMI                                        |
| C09_orf59                                                                  | MG197         | ribosomal protein L35 (rpL35); BACST                                        |
| GT9_orf37                                                                  | MG174         | ribosomal protein L36 (rpL36); CHLTR                                        |
| G07_orf294                                                                 | MG070         | ribosomal protein S2 (rpS2); SPIPL                                          |
| VXpSPT7_orf273                                                             | MG157         | ribosomal protein S3 (rpS3); MYCCA                                          |
| H08_orf205                                                                 | MG311         | ribosomal protein S4 (rpS4); BACSU                                          |
| GT9_orf219                                                                 | MG168         | ribosomal protein S5 (rpS5); BACSU                                          |
| G07_orf215                                                                 | MG090         | ribosomal protein S6 (rpS6); ECOLI                                          |
| G07_orf155                                                                 | MG088         | ribosomal protein S7 (rpS7); BACST                                          |
| GT9_orf142                                                                 | MG165         | ribosomal protein S8 (rpS8); MYCCA                                          |
| C12_orf132                                                                 | MG417         | ribosomal protein S9 (rpS9); BACST                                          |
| VXpSPT7_orf108                                                             | MG150         | ribosomal protein S10 (rpS10); THEMA                                        |
| GT9_orf121                                                                 | MG176         | ribosomal protein S11 (rpS11); BACST                                        |
| G07_orf139                                                                 | MG087         | ribosomal protein S12 (rpS12); BACST                                        |
| GT9_orf124b                                                                | MG175         | ribosomal protein S13 (rpS13); BACSU                                        |
| GT9_orf61                                                                  | MG164         | ribosomal protein S14 (rpS14); MYCCA                                        |
| C12_orf86                                                                  | MG424         | ribosomal protein S15 (BS18); BACST                                         |
| K05_orf88                                                                  | MG446         | ribosomal protein S16 (BS17); BACSU                                         |
| GT9_orf85                                                                  | MG160         | ribosomal protein S17 (rpS17); MYCCA                                        |
| G07_orf104b                                                                | MG092         | ribosomal protein S18 (rpS18); ECOLI                                        |
| VXpSPT7_orf87                                                              | MG155         | ribosomal protein S19 (rpS19); MYCBO                                        |
| G12_orf87                                                                  | MG(M3)        | ribosomal protein S20 (rpsT); ECOLI                                         |
| D12_orf288                                                                 | MG012         | ribosomal protein S6 modification protein (rimK); ECOLI                     |
| H91_orf242a                                                                | MG252         | hypothetical protein YacO (rRNA methylase) homolog; BACSU                   |
| VXpSPT7_orf116                                                             | MG143         | ribosome binding factor A homolog (rbfA); ECOLI                             |
| • <b>Transport and binding proteins - ABC transport [34]</b>               |               |                                                                             |
| A05_orf382                                                                 | MG303         | abc transport ATP-binding protein (artP); ECOLI                             |
| D09_orf286a                                                                | MG044         | spermidine/putrescine transport system permease (potI); ECOLI               |
| D09_orf286b                                                                | MG043         | spermidine/putrescine transport system permease (potB); HAEIN               |
| D09_orf560L                                                                | MG042         | spermidine/putrescine transport ATP-binding prot (potA); ECOLI              |
| F10_orf491                                                                 | MG225         | hypothetical protein (gi: 710640) homolog (put. amino acid permease); CLOPE |
| F10_orf503                                                                 | MG226         | general amino acid permease GAP1 homolog; YEAST                             |
| G07_orf376                                                                 | MG078         | oligopeptide transport system permease protein (amiD); STRPN                |
| G07_orf389a                                                                | MG077         | oligopeptide transport system permease protein (oppB); BACSU                |
| G07_orf423                                                                 | MG079         | oligopeptide transport ATP-binding protein (oppD); BACSU                    |
| G07_orf851                                                                 | MG080         | oligopeptide transport ATP-binding protein (oppF); BACSU                    |
| GT9_orf303                                                                 | MG180         | histidine transport ATP-binding protein (hisP); ECOLI                       |
| R02_orf465                                                                 | MG065         | glutamine transport ATP-binding protein (glnQ); ECOLI                       |
| C12_orf225                                                                 | MG409         | phosphate transport system regulatory protein (phoU); ECOLI                 |
| C12_orf329                                                                 | MG410         | phosphate transport ATP-binding protein (pstB); ECOLI                       |
| C12_orf651V                                                                | MG411         | phosphate transport system permease protein (pstA); ECOLI                   |
| GT9_orf274                                                                 | MG179         | sulfate transport ATP-binding protein (cysA); SYNPN                         |
| K05_orf284                                                                 | MG065 (MG467) | sulfate transport ATP-binding protein (cysA); SYNPN                         |
| A65_orf311                                                                 | MG121         | high affinity ribose transport protein (rbsC); HAEIN                        |
| A65_orf572                                                                 | MG119         | hypothetical ABC transporter (yjeW) homolog; ECOLI                          |
| E07_orf319                                                                 | MG189         | sn-glycerol-3-phosphate transport system permease protein (ugpE); ECOLI     |
| E07_orf329                                                                 | MG188         | sn-glycerol-3-phosphate transport system permease protein (ugpA); ECOLI     |
| E07_orf586                                                                 | MG187         | sn-glycerol-3-phosphate transport system permease protein (ugpC); ECOLI     |
| A05_orf270L                                                                | MG304         | abc transport ATP-binding protein (cbiO), SALTLY                            |
| G07_orf1872V                                                               | MG071         | MG(2+) transport ATPase, P-type 1 (mgtA); ECOLI                             |

Table 1. Continued

|                                                                       |                      |                                                                                 |
|-----------------------------------------------------------------------|----------------------|---------------------------------------------------------------------------------|
| A05_orf244                                                            | MG290                | ATP-binding protein P29; MYCHR                                                  |
| A05_orf380V                                                           | MG289                | high affinity transport system protein P37; MYCHR                               |
| A05_orf542                                                            | MG291                | transport system permease protein P69; MYCHR                                    |
| D02_orf660                                                            | MG390                | lactococin transport ATP-binding protein (lcnDR3); LACLA                        |
| D12_orf623                                                            | MG014                | transport ATP-binding protein (pmd1); SCHPO                                     |
| D12_orf634                                                            | MG015                | transport ATP-binding protein (msbA); HAEIN                                     |
| F10_orf326                                                            | MG179                | bcrA homolog protein; BACLI                                                     |
| F10_orf750                                                            | -                    | putative ABC transport permease                                                 |
| H08_orf565                                                            | MG322                | Na(+)-translocating ATPase subunit J (ntpJ); ENTHR                              |
| K05_orf339                                                            | MG467                | devA protein homolog; ANASP                                                     |
| <b>• Transport and binding proteins - PTS transport [7]</b>           |                      |                                                                                 |
| E09_orf143V                                                           | -                    | PTS system mannitol-specific component IIA (EIIA-MTL)(mtlF); STRMU              |
| E09_orf379                                                            | -                    | PTS system mannitol-specific component IIA (EIIA-MTL)(mtlA); STACA              |
| R02_orf694                                                            | MG062                | fructose-permease IIBC component (fruA); ECOLI                                  |
| GT9_orf940o                                                           | MG069                | PTS system, glucose-specific IIBC component (EIIABC-GLC); BACSU                 |
| D09_orf88                                                             | MG041                | phosphocarrier protein HPr (ptsH); MYCCA                                        |
| P02_orf159                                                            | -                    | hypothetical phosphotransferase protein Yjfu homolog; ECOLI                     |
| C12_orf572                                                            | MG429                | PEP-dependent HPr protein kinase phosphoryltransferase (Enzyme I) (ptsI); STRSL |
| <b>• Transport and binding proteins - Other transport systems [3]</b> |                      |                                                                                 |
| B01_orf264                                                            | MG033                | glycerol uptake facilitator (glpF); BACSU                                       |
| R02_orf564o                                                           | MG061                | hexosephosphate transport protein (uhpT); SALTY                                 |
| A05_orf475                                                            | MG294                | MG294 homolog(put. permease), MYCGE                                             |
| <b>• Other categories - Adaptations and atypical conditions [3]</b>   |                      |                                                                                 |
| K05_orf140                                                            | MG454                | osmotically inducible protein (osmC); ECOLI                                     |
| K05_orf270                                                            | MG470                | soj homolog protein; BACSU                                                      |
| K05_orf263V                                                           | MG463                | S-adenosylmethionine-6-N',N'-adenosyl (tRNA) dimethyltransferase (ksaG); ECOLI  |
| <b>• Other categories - Other [188]</b>                               |                      |                                                                                 |
| A05_orf102                                                            | -                    | hypothetical 13.2 KD protein homolog (yIxm); BACSU                              |
| A05_orf129                                                            | MG296                | MG296 homolog, MYCGE                                                            |
| A05_orf290                                                            | (MG125)              | hypothetical protein (YidA) homolog; ECOLI                                      |
| A05_orf317                                                            | MG302                | MG302 homolog, MYCGE                                                            |
| A05_orf370                                                            | MG295                | hypothetical protein (HI0174); HAEIN                                            |
| A05_orf395                                                            | MG306                | MG306 homolog, MYCGE                                                            |
| A05_orf982                                                            | MG298                | P115 protein homolog (SGC3); MYCHR                                              |
| A19_orf200                                                            | MG264                | hypothetical protein (HI0890) homolog; HAEIN                                    |
| A19_orf282                                                            | MG265                | hypothetical protein (YidA) homolog; ECOLI                                      |
| A19_orf292                                                            | MG263                | hypothetical protein (YidA) homolog; ECOLI                                      |
| A65_orf100                                                            | MG134                | hypothetical protein YaaK homolog; BACSU                                        |
| A65_orf117                                                            | MG129                | MG129 homolog, MYCGE                                                            |
| A65_orf144                                                            | MG132                | hypothetical protein Hit1 homolog; YEAST                                        |
| A65_orf145                                                            | MG127                | hypothetical protein Ygl1 homolog; STRVR                                        |
| A65_orf166                                                            | MG260 (MG185)        | MG260 homolog, MYCGE                                                            |
| A65_orf223                                                            | MG117                | MG117 homolog, MYCGE                                                            |
| A65_orf251b                                                           | MG116                | MG116 homolog, MYCGE                                                            |
| A65_orf259                                                            | MG128                | hypothetical protein HI0072 homolog; HAEIN                                      |
| A65_orf266                                                            | MG133                | MG133 homolog, MYCGE                                                            |
| A65_orf281                                                            | MG125                | hypothetical protein (gi: 973220) homolog; ECOLI                                |
| A65_orf285                                                            | MG135                | MG135 homolog, MYCGE                                                            |
| A65_orf377                                                            | MG260 (MG185)        | MG260 homolog, MYCGE                                                            |
| A65_orf475                                                            | MG123                | MG123 homolog, MYCGE                                                            |
| A65_orf493                                                            | MG130                | hypothetical protein Ysr1 homolog; MYCMY                                        |
| A65_orf517                                                            | MG120                | MG120 homolog, MYCGE                                                            |
| A65_orf569                                                            | MG139                | MG139 homolog, MYCGE                                                            |
| B01_orf108                                                            | MG029                | hypothetical protein (gi: 606093) homolog; ECOLI                                |
| B01_orf168                                                            | MG027                | MG027 homolog, MYCGE                                                            |
| B01_orf186L                                                           | MG032                | MG032 homolog, MYCGE                                                            |
| B01_orf203                                                            | MG028                | MG028 homolog, MYCGE                                                            |
| B01_orf338                                                            | MG032                | MG032 homolog, MYCGE                                                            |
| B01_orf666                                                            | MG032                | MG032 homolog, MYCGE                                                            |
| B01_orf672                                                            | MG032                | MG032 homolog, MYCGE                                                            |
| B01_orf673                                                            | MG032                | MG032 homolog, MYCGE                                                            |
| C09_orf104                                                            | MG191                | (MG191 homolog, MYCGE)                                                          |
| C09_orf121                                                            | MG202                | MG202 homolog, MYCGE                                                            |
| C09_orf143b                                                           | MG199                | MG199 homolog, MYCGE                                                            |
| C09_orf159                                                            | MG207                | MG207 homolog, MYCGE                                                            |
| C12_orf141                                                            | MG427                | MG427 homolog, MYCGE                                                            |
| C12_orf172                                                            | MG428                | MG428 homolog, MYCGE                                                            |
| C12_orf334                                                            | MG413 (MG414)        | MG413 homolog, MYCGE                                                            |
| C12_orf344                                                            | MG415                | MG415 homolog, MYCGE                                                            |
| C12_orf385                                                            | MG412                | MG412 homolog, MYCGE                                                            |
| C12_orf404                                                            | MG432                | hypothetical protein (yfiB) homolog; SPICI                                      |
| C12_orf561                                                            | MG423                | MG423 homolog, MYCGE                                                            |
| C12_orf839                                                            | MG422                | MG422 homolog, MYCGE                                                            |
| C12_orf997                                                            | MG414                | MG414 homolog, MYCGE                                                            |
| D02_orf108                                                            | MG388                | MG388 homolog, MYCGE                                                            |
| D02_orf129                                                            | MG389                | MG389 homolog, MYCGE                                                            |
| D02_orf135L                                                           | MG067 (MG395, MG068) | MG067 homolog, MYCGE                                                            |
| D02_orf140                                                            | MG395 (MG068)        | MG395 homolog, MYCGE                                                            |

Table 1. *Continued*

|             |                      |                                                     |
|-------------|----------------------|-----------------------------------------------------|
| D02_orf150  | MG068 (MG395)        | MG068 homolog, MYCGE                                |
| D02_orf157L | MG395 (MG068)        | MG395 homolog, MYCGE                                |
| D02_orf225L | MG068 (MG067, MG395) | MG068 homolog, MYCGE                                |
| D02_orf265V | MG068 (MG395, MG067) | MG068 homolog, MYCGE                                |
| D02_orf346  | MG068 (MG395)        | MG068 homolog, MYCGE                                |
| D02_orf347  | MG067 (MG395, MG068) | MG067 homolog, MYCGE                                |
| D02_orf353V | MG068 (MG395)        | MG068 homolog, MYCGE                                |
| D02_orf569  | MG397                | MG397 homolog, MYCGB                                |
| D09_orf125  | MG055                | MG055 homolog, MYCGB                                |
| D09_orf147  | MG059                | hypothetical protein A43259 homolog; ENTHR          |
| D09_orf178  | MG057                | hypothetical protein YabF homolog; BACSU            |
| D09_orf276  | MG056                | hypothetical protein YabC homolog; BACSU            |
| D09_orf451  | MG037                | pre-B cell enhancing factor homolog (pbeF); HUMAN   |
| D09_orf518  | MG096                | MG096 homolog, MYCGE                                |
| D09_orf632  | MG288 (MG096)        | MG288 homolog, MYCGE                                |
| D12_orf261  | MG009                | hypothetical protein yabD homolog; BACSU            |
| D12_orf285  | MG011                | MG011 homolog, MYCGE                                |
| E07_orf1113 | MG140                | MG140 homolog, MYCGE                                |
| E07_orf265  | MG260 (MG185)        | MG260 homolog, MYCGE                                |
| E07_orf324  | MG190                | hypothetical 28K protein (orf4, P1 operon); MYCPN   |
| E07_orf485  | MG260 (MG185)        | MG260 homolog, MYCGE                                |
| E09_orf136  | MG441                | MG441 homolog, MYCGE                                |
| E09_orf204a | -                    | protein P30, MYCPN                                  |
| E09_orf287o | MG439                | MG439 homolog, MYCGE                                |
| E09_orf302  | MG440                | MG440 homolog, MYCGE                                |
| F04_orf154  | MG288 (MG096)        | MG288 homolog, MYCGE                                |
| F04_orf260V | MG288                | MG288 homolog, MYCGE                                |
| F10_orf100a | MG233                | hypothetical protein YsxB homolog; BACSU            |
| F10_orf141b | MG221                | hypothetical protein YabB homolog; ECOLI            |
| F10_orf153  | MG230                | MG230 homolog, MYCGE                                |
| F10_orf158  | MG236                | MG236 homolog, MYCGE                                |
| F10_orf291  | MG240                | MG240 homolog, MYCGE                                |
| F10_orf294  | MG237                | MG237 homolog, MYCGE                                |
| F10_orf308  | MG222                | hypothetical protein YabC homolog; ECOLI            |
| F10_orf419  | MG223                | MG223 homolog, MYCGE                                |
| F10_orf621  | MG241                | MG241 homolog, MYCGE                                |
| F10_orf632o | MG242                | MG242 homolog, MYCGE                                |
| F10_orf90   | MG220                | MG220 homolog, MYCGE                                |
| F11_orf114  | MG267                | MG267 homolog, MYCGE                                |
| F11_orf122a | MG284                | MG284 homolog, MYCGE                                |
| F11_orf197  | MG286                | MG286 homolog, MYCGE                                |
| F11_orf218  | MG279                | MG279 homolog, MYCGE                                |
| F11_orf229  | MG268                | hypothetical protein YaaF homolog; BACSU            |
| F11_orf287  | MG280                | MG280 homolog, MYCGE                                |
| F11_orf346  | MG285                | MG285 homolog, MYCGE                                |
| F11_orf358b | MG269                | MG269 homolog, MYCGE                                |
| F11_orf582  | MG281                | MG281 homolog, MYCGE                                |
| F11_orf887  | MG277                | MG277 homolog, MYCGE                                |
| G07_orf1030 | MG075                | protein P100; MYCPN                                 |
| G07_orf135  | MG074                | MG074 homolog, MYCGE                                |
| G07_orf138  | MG076                | MG076 homolog, MYCGE                                |
| G07_orf289  | MG084                | hypothetical protein (yacA) homolog; BACSU          |
| G07_orf312  | MG085                | MG085 homolog, MYCGE                                |
| G07_orf417  | MG288 (MG096)        | MG288 homolog, MYCGE                                |
| G07_orf478o | MG100                | PET112 protein homolog; YEAST                       |
| G07_orf478V | MG099                | amidase homolog (S47454); YEAST                     |
| G07_orf479  | MG098                | MG098 homolog, MYCGE                                |
| G12_orf104  | MG376                | MG376 homolog, MYCGE                                |
| G12_orf109  | MG353                | MG353 homolog, MYCGE                                |
| G12_orf136  | MG354                | MG354 homolog, MYCGE                                |
| G12_orf166a | MG342                | MG342 homolog, MYCGE                                |
| G12_orf166b | MG346                | hypothetical protein Ygl3 homolog; BACST            |
| G12_orf210V | MG347                | hypothetical protein HI0340 homolog; HAEIN          |
| G12_orf218  | MG364                | MG364 homolog, MYCGE                                |
| G12_orf269  | MG374                | MG374 homolog, MYCGE                                |
| G12_orf281  | MG373                | MG373 homolog, MYCGE                                |
| G12_orf325  | MG371                | hypothetical 28K protein (P1 operon) homolog; MYCPN |
| G12_orf326  | MG370                | hypothetical protein (HI0176) homolog; HAEIN        |
| G12_orf328b | MG350                | MG350 homolog, MYCGE                                |
| G12_orf348  | MG343                | MG343 homolog, MYCGE                                |
| G12_orf387  | MG372                | MG372 homolog, MYCGE                                |
| G12_orf413  | MG349                | MG349 homolog, MYCGE                                |
| G12_orf558  | MG369                | MG369 homolog, MYCGE                                |
| G12_orf664  | MG366                | MG366 homolog, MYCGE                                |
| GT9_orf148  | MG260                | MG260 homolog, MYCGE                                |
| GT9_orf434  | MG181                | MG181 homolog, MYCGE                                |
| H03_orf235  | MG381                | MG381 homolog, MYCGE                                |
| H08_orf157b | MG321                | MG321 homolog, MYCGE                                |
| H08_orf193  | MG319                | MG319 homolog, MYCGE                                |
| H08_orf231  | MG323                | hypothetical protein YZAC homolog; BACSU            |
| H08_orf263  | MG313                | MG313 homolog, MYCGE                                |
| H08_orf287  | MG320                | (cytochrome C oxidase polypeptide I (CtaD); BACSU)  |
| H08_orf314  | MG315                | MG315 homolog, MYCGE                                |
| H08_orf345  | MG307                | MG307 homolog, MYCGE                                |

Table 1. Continued

|                                 |                |                                            |
|---------------------------------|----------------|--------------------------------------------|
| H08_orf369                      | MG316          | (competence locus E (comE3); BACSU)        |
| H08_orf448                      | MG314          | MG314 homolog, MYCGE                       |
| H08_orf572o                     | MG307          | MG307 homolog, MYCGE                       |
| H08_orf591                      | MG321          | MG321 homolog, MYCGE                       |
| H08_orf726                      | MG307          | MG307 homolog, MYCGE                       |
| H10_orf149                      | MG211          | MG211 homolog, MYCGE                       |
| H10_orf196                      | MG208          | MG208 homolog, MYCGE                       |
| H10_orf208                      | MG214          | hypothetical protein P35155 homolog; BACSU |
| H10_orf309                      | MG209          | hypothetical protein YceC homolog; ECOLI   |
| H91_orf213                      | MG248          | MG248 homolog, MYCGE                       |
| H91_orf224                      | MG243          | MG243 homolog, MYCGE                       |
| H91_orf239                      | MG247          | hypothetical protein YgiH homolog; ECOLI   |
| H91_orf258                      | MG256          | MG256 homolog, MYCGE                       |
| H91_orf281                      | MG246          | MG246 homolog, MYCGE                       |
| H91_orf534                      | MG255          | MG255 homolog, MYCGE                       |
| H91_orf677                      | MG260          | MG260 homolog, MYCGE                       |
| K04_orf202                      | MG105          | MG105 homolog, MYCGE                       |
| K04_orf222                      | MG101          | MG101 homolog, MYCGE                       |
| K04_orf278L                     | MG110          | hypothetical protein YjeQ homolog; ECOLI   |
| K04_orf280                      | MG103          | MG103 homolog, MYCGE                       |
| K05_orf169                      | MG459          | hypothetical protein HI0671 homolog; HAEIN |
| K05_orf234                      | MG449          | MG449 homolog, MYCGE                       |
| K05_orf237                      | MG450          | degV homolog protein; BACSU                |
| K05_orf251                      | MG452          | MG452 homolog, MYCGE                       |
| K05_orf271                      | MG442          | MG442 homolog, MYCGE                       |
| K05_orf345                      | MG456          | MG456 homolog, MYCGE                       |
| K05_orf385                      | MG464          | hypothetical protein I (S42122); MYCCA     |
| K05_orf401                      | MG443          | hypothetical protein (P27712); SPICI       |
| K05_orf425                      | MG461          | MG461 homolog, MYCGE                       |
| K05_orf499                      | MG447          | MG447 homolog, MYCGE                       |
| P01_orf1033                     | MG328          | MG328 homolog, MYCGE                       |
| P01_orf197                      | MG333          | hypothetical protein HII366 homolog; HAEIN |
| P01_orf209                      | MG331          | MG331 homolog, MYCGE                       |
| P01_orf235                      | MG332          | hypothetical protein HI0315 homolog; HAEIN |
| P01_orf293                      | MG326          | degV homolog protein; BACSU                |
| P01_orf341                      | marginal MG025 | hypothetical protein YibD homolog; ECOLI   |
| P02_orf140                      | MG337          | MG337 homolog, MYCGE                       |
| P02_orf218                      | -              | hypothetical protein Yjfv homolog; ECOLI   |
| P02_orf305                      | -              | hypothetical protein Yjfw homolog; ECOLI   |
| P02_orf316                      | MG338          | MG338 homolog, MYCGE                       |
| P02_orf408                      | MG336          | nitrogen fixation protein (nifS); HAEIN    |
| P02_orf427                      | MG288 (MG096)  | MG288 homolog, MYCGE                       |
| P02_orf458                      | MG096 (MG288)  | MG096 homolog, MYCGE                       |
| P02_orf509                      | MG288 (MG096)  | MG288 homolog, MYCGE                       |
| P02_orf660                      | -              | hypothetical protein Yjfs homolog; ECOLI   |
| R02_orf1386V                    | MG064          | MG064 homolog, MYCGE                       |
| R02_orf147                      | MG260          | MG260 homolog, MYCGE                       |
| R02_orf469                      | MG061          | MG061 homolog, MYCGE                       |
| R02_orf524                      | MG068 (MG067)  | MG068 homolog, MYCGE                       |
| VXpSPT7_orf269                  | MG145          | hypothetical protein (YaaC) homolog; PSEFL |
| VXpSPT7_orf377                  | MG147          | MG147 homolog, MYCGE                       |
| VXpSPT7_orf402                  | MG144          | MG144 homolog, MYCGE                       |
| VXpSPT7_orf445                  | MG148          | MG148 homolog, MYCGE                       |
| * no classification so far [86] |                |                                            |
| A19_orf1140                     | -              | -                                          |
| A19_orf129                      | -              | -                                          |
| A19_orf204                      | -              | -                                          |
| A19_orf229V                     | -              | -                                          |
| A19_orf591                      | -              | -                                          |
| A65_orf115                      | -              | -                                          |
| A65_orf118                      | -              | -                                          |
| B01_orf103b                     | -              | -                                          |
| B01_orf116L                     | -              | -                                          |
| B01_orf147                      | -              | -                                          |
| b01_orf182l                     | -              | -                                          |
| B01_orf274                      | -              | -                                          |
| C09_orf130b                     | -              | -                                          |
| C09_orf140o                     | -              | -                                          |
| C09_orf165                      | -              | -                                          |
| C09_orf172                      | -              | -                                          |
| C09_orf223                      | -              | -                                          |
| C09_orf251                      | -              | -                                          |
| C09_orf404                      | -              | -                                          |
| C09_orf422                      | -              | -                                          |
| C09_orf718                      | -              | -                                          |
| C12_orf181o                     | -              | -                                          |
| C12_orf247                      | -              | -                                          |
| D02_orf100                      | -              | -                                          |
| D02_orf109                      | -              | -                                          |
| D02_orf122a                     | -              | -                                          |
| D02_orf122b                     | -              | -                                          |
| D02_orf128                      | -              | -                                          |
| D09_orf127a                     | -              | -                                          |



Table 1. *Continued*

|                                                                      |                |                                                |
|----------------------------------------------------------------------|----------------|------------------------------------------------|
| D12_orf131                                                           | -              | -                                              |
| D12_orf235                                                           | -              | -                                              |
| D12_orf257                                                           | -              | -                                              |
| E07_orf133                                                           | -              | -                                              |
| E07_orf140                                                           | -              | -                                              |
| E07_orf163                                                           | -              | -                                              |
| E07_orf166                                                           | -              | -                                              |
| E07_orf175                                                           | -              | -                                              |
| E07_orf179                                                           | -              | -                                              |
| E07_orf228                                                           | -              | -                                              |
| E09_orf136L                                                          | marginal MG440 | -                                              |
| E30_orf352                                                           | -              | -                                              |
| F04_orf120                                                           | -              | -                                              |
| F04_orf150                                                           | -              | -                                              |
| F10_orf218                                                           | -              | -                                              |
| F10_orf357                                                           | marginal MG011 | -                                              |
| F10_orf565                                                           | -              | -                                              |
| F10_orf741                                                           | -              | -                                              |
| F11_orf148o                                                          | -              | -                                              |
| F11_orf879                                                           | -              | -                                              |
| G12_orf140b                                                          | -              | -                                              |
| G12_orf168                                                           | -              | -                                              |
| G12_orf225                                                           | -              | -                                              |
| GT9_orf113                                                           | -              | -                                              |
| H03_orf152                                                           | -              | -                                              |
| H08_orf102                                                           | -              | -                                              |
| H10_orf119                                                           | -              | -                                              |
| H10_orf206                                                           | -              | -                                              |
| H10_orf220L                                                          | -              | -                                              |
| H91_orf115                                                           | -              | -                                              |
| H91_orf180                                                           | -              | -                                              |
| H91_orf216                                                           | -              | -                                              |
| K05_orf101a                                                          | -              | -                                              |
| K05_orf106                                                           | -              | -                                              |
| K05_orf1882                                                          | marginal MG064 | -                                              |
| K05_orf250                                                           | -              | -                                              |
| P01_orf140                                                           | -              | -                                              |
| P01_orf199                                                           | -              | -                                              |
| P01_orf243                                                           | -              | -                                              |
| P02_orf103b                                                          | -              | -                                              |
| P02_orf126                                                           | -              | -                                              |
| P02_orf143                                                           | -              | -                                              |
| P02_orf147                                                           | -              | -                                              |
| P02_orf163                                                           | -              | -                                              |
| P02_orf196                                                           | -              | -                                              |
| P02_orf253                                                           | -              | -                                              |
| P02_orf474                                                           | -              | -                                              |
| R02_orf101                                                           | -              | -                                              |
| R02_orf105                                                           | -              | -                                              |
| R02_orf140                                                           | -              | -                                              |
| R02_orf150                                                           | -              | -                                              |
| R02_orf183o                                                          | -              | -                                              |
| R02_orf254                                                           | -              | -                                              |
| R02_orf264                                                           | -              | -                                              |
| R02_orf329                                                           | -              | -                                              |
| R02_orf440                                                           | -              | -                                              |
| VXpSPT7_orf112                                                       | -              | -                                              |
| <b>* hypothetical ORFs derived from repetitive DNA elements [46]</b> |                |                                                |
| A05_orf139                                                           | -              | -                                              |
| A19_orf211                                                           | -              | -                                              |
| A65_orf115                                                           | -              | -                                              |
| B01_orf147                                                           | -              | -                                              |
| C09_orf140o                                                          | -              | -                                              |
| C09_orf149a                                                          | -              | -                                              |
| E07_orf163                                                           | -              | -                                              |
| F11_orf148o                                                          | -              | -                                              |
| G12_orf168                                                           | -              | -                                              |
| H08_orf157a                                                          | marginal MG321 | -                                              |
| H91_orf180                                                           | -              | -                                              |
| P01_orf199                                                           | -              | -                                              |
| P02_orf103b                                                          | -              | -                                              |
| P02_orf196                                                           | -              | -                                              |
| R02_orf138                                                           | -              | -                                              |
| R02_orf140                                                           | -              | -                                              |
| R02_orf183o                                                          | -              | -                                              |
| C09_orf149b                                                          | -              | adhesin P1 (group 2) homolog; MYCPN            |
| H08_orf329V                                                          | MG321          | adhesin P1 (group 2) homolog; MYCPN            |
| A65_orf465V                                                          | MG191          | adhesin P1 (group 2) homolog; MYCPN            |
| E07_orf413                                                           | MG191          | ADP1_MYCPN adhesin P1 precursor homolog; MYCPN |
| E07_orf256L                                                          | MG191          | ADP1_MYCPN adhesin P1 precursor homolog; MYCPN |
| A05_orf278                                                           | MG191          | ADP1_MYCPN adhesin P1 precursor homolog; MYCPN |
| H08_orf270                                                           | MG191          | ADP1_MYCPN adhesin P1 precursor homolog; MYCPN |
| P02_orf422V                                                          | MG191          | ADP1_MYCPN adhesin P1 precursor homolog; MYCPN |

Table 1. Continued

|                                                                                                                                         |         |                                                            |
|-----------------------------------------------------------------------------------------------------------------------------------------|---------|------------------------------------------------------------|
| P02_orf422V                                                                                                                             | MG191   | ADP1_MYCPN adhesin P1 precursor homolog; MYCPN             |
| P02_orf527V                                                                                                                             | MG191   | ADP1_MYCPN adhesin P1 precursor homolog; MYCPN             |
| F11_orf533L                                                                                                                             | MG191   | ADP1_MYCPN adhesin P1 precursor homolog; MYCPN             |
| P01_orf208V                                                                                                                             | MG191   | ADP1_MYCPN adhesin P1 precursor homolog; MYCPN             |
| GT9_orf438V                                                                                                                             | MG191   | ADP1_MYCPN adhesin P1 precursor homolog; MYCPN             |
| GT9_orf127                                                                                                                              | -       | ADP1_MYCPN adhesin P1 precursor homolog; MYCPN             |
| GT9_orf313                                                                                                                              | MG191   | ADP1_MYCPN adhesin P1 precursor homolog; MYCPN             |
| C09_orf428V                                                                                                                             | MG191   | ADP1_MYCPN adhesin P1 precursor homolog; MYCPN             |
| A19_orf737V                                                                                                                             | MG191   | ADP1_MYCPN adhesin P1 precursor homolog; MYCPN             |
| E07_orf221V                                                                                                                             | MG191   | ADP1_MYCPN adhesin P1 precursor homolog; MYCPN             |
| R02_orf347L                                                                                                                             | MG191   | ADP1_MYCPN adhesin P1 precursor homolog; MYCPN             |
| G12_orf325                                                                                                                              | MG371   | hypothetical 28K protein (P1 operon) homolog; MYCPN        |
| E07_orf224                                                                                                                              | MG192   | hypothetical 130K protein homolog (orf6, P1 operon); MYCPN |
| E07_orf434                                                                                                                              | MG192   | hypothetical 130K protein homolog (orf6, P1 operon); MYCPN |
| C09_orf272                                                                                                                              | MG192   | hypothetical 130K protein homolog (orf6, P1 operon); MYCPN |
| A05_orf493                                                                                                                              | MG192   | hypothetical 130K protein homolog (orf6, P1 operon); MYCPN |
| R02_orf301                                                                                                                              | -       | hypothetical 130K protein homolog (orf6, P1 operon); MYCPN |
| R02_orf173                                                                                                                              | MG192   | hypothetical 130K protein homolog (orf6, P1 operon); MYCPN |
| H08_orf445                                                                                                                              | MG192   | hypothetical 130K protein homolog (orf6, P1 operon); MYCPN |
| P02_orf381                                                                                                                              | (MG192) | hypothetical 130K protein homolog (orf6, P1 operon); MYCPN |
| H91_orf322                                                                                                                              | MG192   | hypothetical 130K protein homolog (orf6, P1 operon); MYCPN |
| H91_orf272                                                                                                                              | MG192   | hypothetical 130K protein homolog (orf6, P1 operon); MYCPN |
| * RNA - rRNA [3]                                                                                                                        |         |                                                            |
| 5S rRNA                                                                                                                                 |         |                                                            |
| 16S rRNA                                                                                                                                |         |                                                            |
| 23S rRNA                                                                                                                                |         |                                                            |
| * RNA - tRNA [33 tRNAs in 14 genes/operons]                                                                                             |         |                                                            |
| Arg-tRNA gene (CGA); MYCPN                                                                                                              |         |                                                            |
| Arg-tRNA gene (COC); MYCPN                                                                                                              |         |                                                            |
| Arg-tRNA gene (AGA); MYCPN                                                                                                              |         |                                                            |
| Asn-tRNA(AAC), Glu-tRNA(GAA), Thr-tRNA(ACG), Val-tRNA(GTA), Thr-tRNA(ACA), Lys-tRNA(AAG), Leu-tRNA(CTA) genes; MYCPN                    |         |                                                            |
| Cys-tRNA(TGC), Pro-tRNA(CCA), Met-tRNA(ATG), Ile-tRNA(ATG), Ser-tRNA(TCA), fMet-tRNA(ATG), Asp-tRNA(GAC) and Phe-tRNA(TTC) genes; MYCPN |         |                                                            |
| Gly-tRNA(GGC) gene; MYCPN                                                                                                               |         |                                                            |
| His-tRNA(CAC) gene; MYCPN                                                                                                               |         |                                                            |
| Ile-tRNA(ATC), Ala-tRNA(GCA) genes; MYCPN                                                                                               |         |                                                            |
| Thr-tRNA(UGU) gene; MYCPN                                                                                                               |         |                                                            |
| Ser-tRNA (AGC) gene; MYCPN                                                                                                              |         |                                                            |
| Ser-tRNA(TCC), Ser-tRNA(TCG) genes; MYCPN                                                                                               |         |                                                            |
| Trp-tRNA (TGA) gene; MYCPN                                                                                                              |         |                                                            |
| Trp-tRNA(TGG) gene; MYCPN                                                                                                               |         |                                                            |
| Tyr-tRNA (TAC), Glu-tRNA (CAA), Lys-tRNA (AAA), Leu-tRNA (TTA), Gly-tRNA (GGA) genes; MYCPN                                             |         |                                                            |
| * RNA - other [3]                                                                                                                       |         |                                                            |
| 4.5S RNA; MYCPN                                                                                                                         |         |                                                            |
| 10sa RNA; MYCGE                                                                                                                         |         |                                                            |
| RNaseP RNA; MYCGE                                                                                                                       |         |                                                            |

MG is the name of the corresponding ORF in *M.genitalium* (9).

coding densities have been also estimated for the smaller *M.genitalium* genome (9) and for the genome of *Haemophilus influenzae* which is more than twice as large (30). The length of the proposed proteins in *M.pneumoniae* ranges from 37 (4.3 kDa) to 1882 (209.4 kDa) amino acids (Fig. 3). One of the largest proteins is the cytoadherence accessory protein HMW2 (F10\_orf1818) and the smallest identified protein is the 37 amino acid ribosomal protein L36 (GT9\_orf37). For practical reasons we introduced at the beginning of the sequence analysis a cut-off point of 100 amino acids for proposed proteins unless we found smaller proteins such as some of the ribosomal proteins during the initial BLASTX homology search. All intergenic or non coding regions were reanalyzed with a cut-off point of 50 amino acids and searches were done for specific small proteins. However, we cannot exclude the possibility that some of the smaller proteins, not showing similarities to known proteins from other organisms, have been missed in our analysis.

The codon usage of *M.pneumoniae* is summarized in Table 3. We compared it for all proposed genes, for the subsets of genes with a low G+C (content below 35 mol%) and high G+C content (between

50 and 56 mol%) and for all 50 ribosomal protein genes (42.8 mol%) as an example for frequently translated genes. Codon usage of the low and high G+C content subfractions is clearly influenced by the DNA composition, favouring either codons with G/C or A/T at the third position. The codon usage pattern differs also for the complete genome and for genes which are frequently expressed like the ones coding for ribosomal proteins.

The most frequently used codons are AUU (Ile, 4.6%); AAA (Lys, 4.6%); UUU (Phe, 4.3%); GAA (Glu, 4.2%) and UUA (Leu, 3.9%) and the most common amino acids are Leu (10.3%), Lys (8.5%), Ile (6.6%), Ala (6.6%) and Val (6.5%). The high value for Lys is in agreement with the relative high percentage of proposed proteins with calculated isoelectric points between pH 9 and 12 (Fig. 4). The least frequently used codons are UGC (Cys, 0.2%); CGA (Arg, 0.25%); AGG (Arg, 0.29%); AGA (Arg, 0.4%) and UGU (Cys, 0.55%).

All *M.pneumoniae* gene products were classified (Table 1 and 2), with some minor modifications, in accordance with criteria introduced for *Escherichia coli* (31) and adapted for the classification of putative genes from *H.influenzae*. We added

Table 2. Summary of the functional classification of the ORFs

|                                                                      |     |
|----------------------------------------------------------------------|-----|
| • Biosynthesis of cofactors, prosthetic groups and carrier           | 8   |
| Folic acid                                                           | 5   |
| Heme and porphyrin                                                   | 1   |
| Thioredoxin                                                          | 2   |
| • Cell envelope                                                      | 54  |
| Membranes, lipoproteins and porines                                  | 42  |
| Surface structures and cytoadherence                                 | 8   |
| Surfaces polysaccharides, lipopolysaccharides and antigens           | 4   |
| • Cellular processes                                                 | 20  |
| Cell division                                                        | 2   |
| Cell killing                                                         | 1   |
| Chaperones                                                           | 7   |
| Detoxification                                                       | 1   |
| Protein and peptide secretion                                        | 9   |
| • Central intermediary metabolism                                    | 6   |
| Other                                                                | 5   |
| Phosphorous compounds                                                | 1   |
| • Energy metabolism                                                  | 39  |
| Aerobic                                                              | 3   |
| Amino acids and amines                                               | 5   |
| Anaerobic                                                            | 1   |
| ATP-proton motive force interconversion                              | 9   |
| Glycolysis                                                           | 10  |
| Pentose Phosphate pathway                                            | 2   |
| Pyruvate DHase                                                       | 4   |
| Sugars                                                               | 5   |
| • Fatty acid and phospholipid metabolism                             | 9   |
| • Purines, pyrimidines, nucleosides and nucleotides                  | 18  |
| 2'-Deoxyribonucleotide metabolism                                    | 3   |
| Nucleotide and nucleoside interconversions                           | 2   |
| Purine ribonucleotide biosynthesis                                   | 3   |
| Salvage of nucleosides and nucleotides                               | 8   |
| Sugar-nucleotide biosynthesis and conversions                        | 2   |
| • Pyridine nucleotide metabolism                                     | 1   |
| • Regulatory function                                                | 8   |
| • Replication                                                        | 46  |
| DNA replication, restriction, modification, recombination and repair | 46  |
| • Transcription                                                      | 13  |
| Degradation of RNA                                                   | 2   |
| RNA synthesis, modification and DNA transcription                    | 11  |
| • Translation                                                        | 99  |
| Amino acyl tRNA synthetases and tRNA modification                    | 24  |
| Degradation of proteins, peptides and glycopeptides                  | 8   |
| Protein modification and translation factors                         | 15  |
| Ribosomal proteins: synthesis and modification                       | 52  |
| • Transport and binding proteins                                     | 44  |
| ABC transport                                                        | 34  |
| PTS transport                                                        | 7   |
| Other transport systems                                              | 3   |
| • Other categories                                                   | 191 |
| Adaptations and atypical conditions                                  | 3   |
| Other                                                                | 188 |
| • hypothetical ORFs derived from repetitive DNA elements             | 46  |
| • no classification so far                                           | 86  |
| • RNA                                                                | 39  |
| rRNA                                                                 | 3   |
| tRNA                                                                 | 33  |
| other                                                                | 3   |

'cytoadherence associated proteins' to the category of cell envelope-surface structures, since evidence is mounting, that *M.pneumoniae* possesses a cytoskeleton-like organization which stabilizes the bacterium and protects it against osmotic lysis (2). The category of transport and binding proteins was altered by subdivision into three groups namely, into PTS-, ABC- and other transport systems. To facilitate the orientation on the gene map we added a list which contains all proposed ORFs and RNAs in numerical order (Table 4).

More details on this very general analysis will be made public on the www ([http://www.zmbh.uni-heidelberg.de/M\\_pneumoniae](http://www.zmbh.uni-heidelberg.de/M_pneumoniae)).

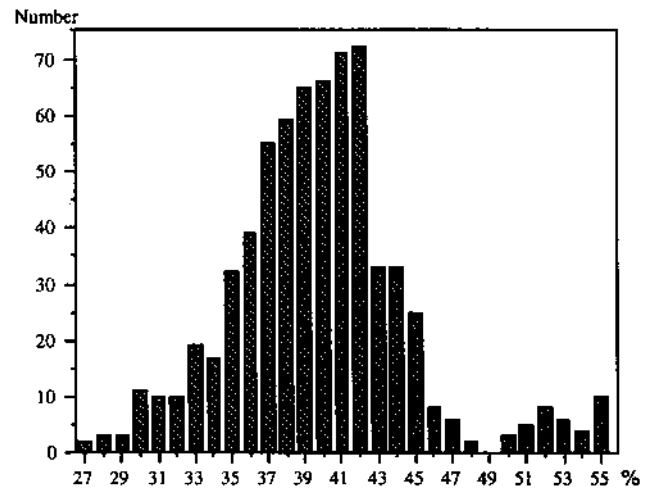

Figure 2. Distribution of the G+C content of the coding sequences of all *M.pneumoniae* ORFs.

### DNA replication and repair

The central enzyme for DNA replication in bacteria is the DNA polymerase III holoenzyme (32), which consists of 10 subunits in *E.coli*, a DNA polymerase subunit  $\alpha$  and nine accessory proteins ( $\epsilon$ ,  $\nu$ ,  $\tau$ ,  $\gamma$ ,  $\delta$ ,  $\delta'$ ,  $\chi$ ,  $\psi$  and  $\beta$ ). *Mycoplasma pneumoniae* codes for two potential  $\alpha$  subunits (the gene name in the literature is either *dnaE* or *polC*). Both proposed  $\alpha$  subunits, A19\_orf872 and B01\_orf1443, differ in length and also in their degree of similarity to the  $\alpha$  subunits from *E.coli* and *Bacillus subtilis*. The protein from B01\_orf1443 shares the highest similarity with the  $\alpha$  subunit from Gram-positive bacteria including the motif for a 3'-5' exonuclease activity which is typical for these bacteria. In contrast, the orf A19\_orf872 is most similar to the  $\alpha$  subunit from *E.coli* and does not contain a 3'-5' exonuclease domain. The 3'-5' exonuclease activity in *E.coli* is encoded by a separate gene (*dnaQ*), which has not been found in *M.pneumoniae*. Of the other subunits which build the DNA polymerase III holoenzyme in *E.coli* (32) only the subunits  $\beta$  (*dnaN*),  $\delta'$  (*holB*),  $\gamma$  and  $\tau$  (*dnaX*) are present in *M.pneumoniae*, indicating a simplified replication complex compared with the Gram-negative bacteria *E.coli* and *H.influenzae*. Presently, it cannot be excluded that other proteins replace these subunits in *M.pneumoniae*. A true comparison with a phylogenetically closer related Gram-positive bacterium like *B.subtilis* is not possible since the *Bacillus* DNA polymerase III holoenzyme complex has not been defined as yet and the nucleotide sequence of the entire *B.subtilis* genome has not been completed.

*Mycoplasma pneumoniae* does not code for a DNA polymerase I (*polA*)-like DNA repair enzyme. Instead, we find a truncated *polA* gene (A19\_orf291) comprising only the 5'-3' exonuclease domain, whereas in *E.coli* and *B.subtilis* the *polA* gene is much larger and codes for the 5'-3' exonuclease and a 5'-3' polymerase-specific domain.

Experimental results on DNA polymerase enzymatic activities in mycoplasmas are confusing. It was claimed that the DNA polymerase III of *Mollicutes* lacks the 3'-5' exonuclease proof-reading activity in general (33) and this was taken as an explanation for the observed genetic instability of many *Mollicutes* species (4). Recently, the nucleotide sequence of the *polC* gene of

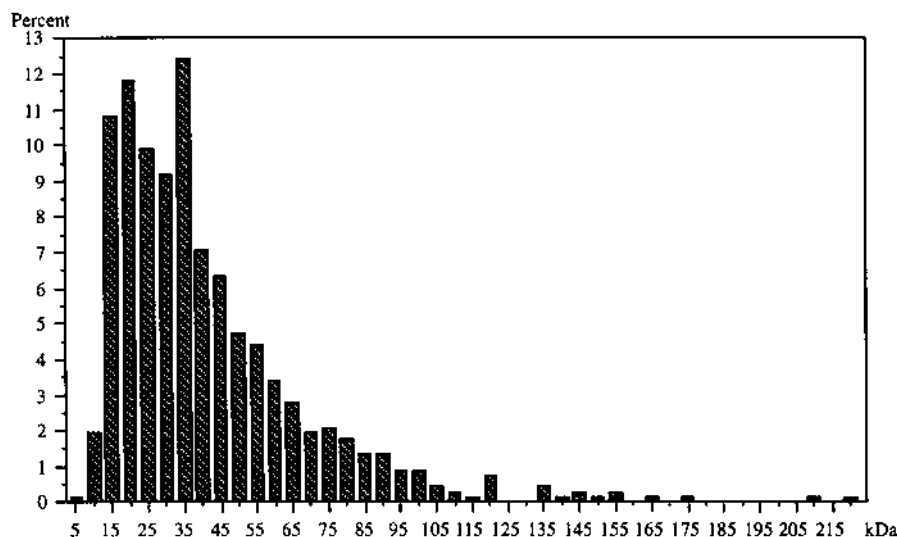

Figure 3. Distribution of all *M. pneumoniae* proteins according to their molecular weight.

*Mycoplasma pulmonis* and experimental results on enzyme purification and characterization of enzyme activities were published (34). The results indicated that the polC gene from *M. pulmonis* also codes for a 3'-5' exonuclease, and that the size of the predicted PolC protein, 1435 amino acids, is very similar to the PolC homolog B01\_orf1443 in *M. pneumoniae* and that the polymerase could be inhibited by compounds specific for PolC proteins of Gram-positive bacteria. Furthermore, the authors provided some experimental evidence for a second, smaller enzyme with DNA polymerase activity. Considering the characterization data of DNA polymerase activities in *M. pulmonis* and the nucleotide sequence data on DNA polymerase genes of *M. pneumoniae* and *M. genitalium* (9,35), one can conclude that at least these three *Mycoplasma* species have two DNA polymerase (polC) genes coding for a larger protein ( $\approx 1400$  amino acids) with a 3'-5' exonuclease activity and with the highest sequence similarities to the Gram-positive *B. subtilis* polymerase III. Therefore it is unlikely that an increased mutation frequency is caused by the DNA replication process. The nucleotide sequence of the smaller Pol III homolog ( $\approx 100$  kDa) of *M. pneumoniae* and *M. genitalium* (9,35) resembles more the polC gene from the Gram-negative *E. coli*. This is also emphasized by the absence of the 3'-5' exonuclease domain in the proposed genes. The gene for the smaller, Gram-negative typical PolC has not yet been found in *M. pulmonis*, but during the purification of the larger PolC, a second polymerase activity lacking exonuclease activity has been identified. The function of the exonuclease negative DNA polymerase can only be elucidated experimentally and it remains to be seen if it can substitute for the function of the polymerase I (PolA) in combination with the proposed 5'-3' exonuclease of the truncated polA gene (A19\_orf291). This topic has been also discussed for *M. genitalium* (35).

In addition to the DNA polymerase many more gene products are necessary for DNA replication, e.g. initiation, elongation and termination (32). The most obvious functions missing in *M. pneumoniae* according to the sequence analysis are an RNaseH for primer removal and a protein for the termination of replication.

The number of genes involved in DNA repair is considerably smaller in *M. pneumoniae* than in the 'standard' eubacteria *E. coli* and *B. subtilis* or even *H. influenzae* with the smaller genome.

*Mycoplasma pneumoniae* codes only for 13 of the genes known to be involved in excision repair of DNA, recombination and SOS repair. Thus the genes recB, recC, recD, recG and ruvC involved in recombination are missing as well as the genes recN, recO, recQ and recR involved in SOS repair in *E. coli*. Nevertheless, a rudimentary stock of enzymes has been conserved in *M. pneumoniae* to permit homologous recombination [RecA, Ssb, PolA (see above), GyrA, GyrB, RuvA and RuvB] (36), excision repair (37) and a kind of truncated SOS repair (38). In particular missing is the lexA gene which plays a central role in regulating the SOS response including the expression of the recA gene in other bacteria.

We were also unable to find components of the so called mismatch-repair system encoded by the mutS, mutL and mutH genes. Since bacteria which normally carry the mut genes show a reduced genetic stability, if these genes are mutated, it seems likely that the absence of these genes in mycoplasmas causes an increased mutation rate (65).

### Transcription

The DNA dependent RNA polymerase of *M. pneumoniae* is coded by the conserved genes rpoA ( $\alpha$  subunit), rpoB ( $\beta$  subunit), rpoC ( $\beta'$  subunit) and rpoE ( $\delta'$  subunit). The only sigma factor found (H91\_orf499) shares the highest similarity with the sigma factor SigA from *B. subtilis* (39). Presently, not enough experimental data are available for defining promoter sequences in *M. pneumoniae*. The promoter of only three genes/operons have been determined experimentally by primer extension. These genes are the P1 operon (14), the ribosomal RNA operon (40) and F10\_orf405 (27). The -10 region and to a lesser extent the -35 region of these three examples are comparable with consensus promoters sequences in *B. subtilis* (41). Termination of transcription seems to be independent of the termination factor Rho, since the corresponding gene could not be found. Transcription stops on typical terminator sequences which are short interrupted palin-



**Table 3.** Codon usage of different sets of *M.pneumoniae* ORFs: all 677 ORFs; ORFs with a G+C content <35 mol%; codon usage of the adhesin P1 and ORF6 (high G+C content); ribosomal ORFs as examples for frequently expressed proteins

| Amino Acid | Codon | all MP ORFs(677) /1000 | GC<35% /1000 | high GC (P1+orf6) /1000 | ribosomal ORFs /1000 |
|------------|-------|------------------------|--------------|-------------------------|----------------------|
| Ala        | GCA   | 13.76                  | 14.92        | 8.43                    | 14.90                |
| Ala        | GCC   | 16.50                  | 8.09         | 27.75                   | 16.95                |
| Ala        | GGG   | 11.05                  | 4.43         | 22.48                   | 13.12                |
| Ala        | GCT   | 25.20                  | 22.80        | 25.64                   | 30.62                |
| Arg        | AGA   | 4.02                   | 11.22        | 2.46                    | 5.19                 |
| Arg        | AGG   | 2.84                   | 3.70         | 4.21                    | 1.37                 |
| Arg        | CGA   | 2.48                   | 3.55         | 2.81                    | 3.42                 |
| Arg        | CGC   | 10.72                  | 4.59         | 14.75                   | 22.83                |
| Arg        | CGG   | 5.00                   | 0.94         | 5.27                    | 8.20                 |
| Arg        | GGT   | 9.68                   | 5.63         | 6.32                    | 21.46                |
| Asn        | AAC   | 37.01                  | 27.91        | 41.80                   | 41.69                |
| Asn        | AAT   | 25.09                  | 45.50        | 24.24                   | 15.72                |
| Asp        | GAC   | 19.16                  | 13.88        | 25.99                   | 14.63                |
| Asp        | GAT   | 30.40                  | 39.18        | 32.31                   | 19.68                |
| Cys        | TGC   | 2.09                   | 2.82         | 0.00                    | 2.32                 |
| Cys        | TGT   | 5.39                   | 5.48         | 0.00                    | 3.96                 |
| Gln        | CAA   | 37.90                  | 39.55        | 31.96                   | 35.95                |
| Gln        | CAG   | 15.65                  | 7.46         | 21.07                   | 8.34                 |
| Glu        | GAA   | 42.01                  | 53.22        | 20.02                   | 39.64                |
| Glu        | GAG   | 14.71                  | 12.47        | 12.29                   | 11.34                |
| Gly        | GCA   | 6.38                   | 9.29         | 8.43                    | 7.52                 |
| Gly        | GCC   | 11.81                  | 9.34         | 22.13                   | 12.17                |
| Gly        | GGG   | 8.95                   | 2.30         | 25.99                   | 8.61                 |
| Gly        | GGT   | 27.90                  | 22.33        | 27.75                   | 34.86                |
| His        | CAC   | 11.86                  | 6.16         | 8.08                    | 16.54                |
| His        | CAT   | 6.17                   | 6.16         | 2.81                    | 4.24                 |
| Ile        | ATA   | 5.46                   | 12.84        | 1.40                    | 1.78                 |
| Ile        | ATC   | 14.39                  | 13.10        | 11.59                   | 13.94                |
| Ile        | ATT   | 45.99                  | 48.21        | 16.16                   | 47.57                |
| Leu        | CTA   | 10.62                  | 10.64        | 3.86                    | 8.88                 |
| Leu        | CTC   | 12.23                  | 6.47         | 26.69                   | 13.81                |
| Leu        | CTG   | 9.54                   | 5.17         | 10.89                   | 6.01                 |
| Leu        | CTT   | 10.06                  | 18.10        | 8.78                    | 7.38                 |
| Leu        | TTA   | 39.24                  | 46.54        | 19.32                   | 34.03                |
| Leu        | TTG   | 21.48                  | 17.48        | 22.48                   | 16.54                |
| Lys        | AAA   | 46.27                  | 73.20        | 24.24                   | 61.92                |
| Lys        | AAG   | 39.08                  | 29.84        | 33.02                   | 63.01                |
| Met        | ATG   | 15.60                  | 13.98        | 7.38                    | 21.32                |
| Phe        | TTC   | 12.75                  | 16.23        | 10.89                   | 7.52                 |
| Phe        | TTT   | 43.03                  | 53.17        | 25.64                   | 24.06                |
| Pro        | CCA   | 10.86                  | 9.76         | 16.51                   | 12.03                |
| Pro        | CCC   | 9.05                   | 3.13         | 23.18                   | 7.11                 |
| Pro        | CCG   | 6.65                   | 2.40         | 14.05                   | 7.52                 |
| Pro        | CCT   | 8.30                   | 9.86         | 9.13                    | 9.16                 |
| Ser        | AGC   | 10.62                  | 10.49        | 11.94                   | 8.20                 |
| Ser        | AGT   | 21.04                  | 21.76        | 28.10                   | 12.85                |
| Ser        | TCA   | 8.74                   | 13.20        | 8.43                    | 8.61                 |
| Ser        | TCC   | 9.59                   | 6.73         | 22.48                   | 9.84                 |
| Ser        | TCG   | 6.43                   | 3.18         | 15.10                   | 5.06                 |
| Ser        | TCT   | 8.16                   | 15.03        | 5.97                    | 6.15                 |
| Thr        | ACA   | 10.38                  | 15.18        | 8.43                    | 8.47                 |
| Thr        | ACC   | 21.92                  | 11.74        | 45.66                   | 27.88                |
| Thr        | ACG   | 7.90                   | 3.60         | 18.97                   | 6.56                 |
| Thr        | ACT   | 19.32                  | 24.16        | 10.89                   | 17.22                |
| Trp        | TGA   | 6.06                   | 8.77         | 9.83                    | 2.32                 |
| Trp        | TGG   | 5.82                   | 3.60         | 9.13                    | 4.10                 |
| Tyr        | TAC   | 17.94                  | 15.34        | 16.51                   | 13.67                |
| Tyr        | TAT   | 14.26                  | 20.04        | 10.89                   | 9.16                 |
| Val        | GTA   | 13.73                  | 11.64        | 7.73                    | 21.05                |
| Val        | GTC   | 11.03                  | 4.85         | 15.45                   | 8.47                 |
| Val        | GTG   | 18.73                  | 6.37         | 29.50                   | 21.46                |
| Val        | GTT   | 21.17                  | 27.50        | 14.05                   | 23.10                |
| xxx        | TAA   | 2.05                   | 2.97         | 0.35                    | 1.91                 |
| xxx        | TAG   | 0.78                   | 0.83         | 0.35                    | 5.06                 |

dromic regions followed by a run of U residues. The Nus transcription termination factors, of which NusA (E07\_orf540) and NusG (D09\_orf320) are present, may play a role in the termination of transcription. NusB and NusC are absent. NusA is involved in termination and NusG in antitermination in other bacteria. Finally, GreA promotes elongation by the RNA polymerase by utilizing a novel transcript-cleavage reaction (42).

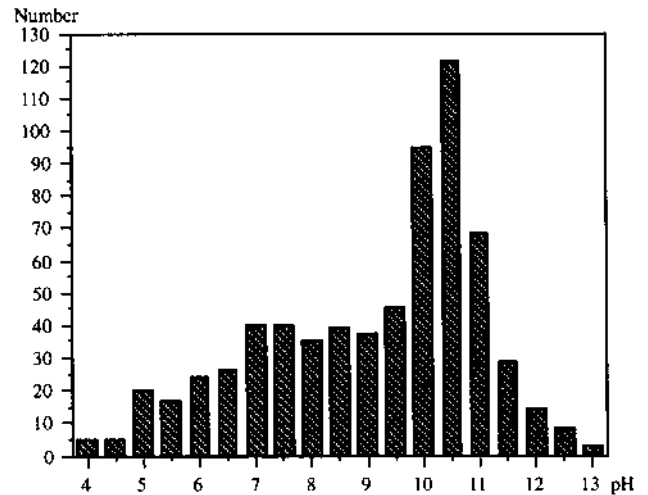

**Figure 4.** Distribution of all *M.pneumoniae* proteins according to their predicted isoelectric point (IP).

### Gene expression and regulation

Regulation of gene expression in *M.pneumoniae* has not been studied so far. Therefore we do not know how this bacterium coordinates the synthesis of those gene products which are essential for reproduction. Also, *M.pneumoniae* has to sense and respond to environmental changes. This requires a signal transduction system. The presence of only one sigma factor (sigA, H91\_orf499) which is also the only one of all proposed proteins showing the characteristic helix–turn–helix (HTH) motif, suggests that the response to external stimuli is not controlled by the level of expression of alternative sigma factors.

The presence of a *cis*-acting conserved palindromic repeated sequence in front of four heat shock genes, similar to the 'CIRCE' element first identified in *B.subtilis* (43) and the identification of the proposed repressor (C09\_orf351, hrcA), indicates that the heat shock response in *M.pneumoniae* is regulated by the interaction of this repressor with the CIRCE element, and provides an example for a negative regulation of gene expression in *M.pneumoniae*.

The two-component signal transduction system (44), consisting of a sensor and a response regulator, which has been found in many prokaryotic and eukaryotic organisms is believed to be essential for all cells. Nevertheless, based on sequence similarity we were unable to detect any such system in *M.pneumoniae*.

Concerning other proteins with regulatory functions we identified several GTP-binding proteins and other proteins like the virulence associated protein vacB (K04\_orf726). These regulatory proteins act by unknown mechanisms.

### Translation

The translation machinery of *M.pneumoniae* is rather extensive. About 15% of all proposed ORFs, are involved in translation including 19 tRNA synthetases, 50 ribosomal proteins, various factors and enzymes, 33 tRNAs, one ribosomal RNA operon with one copy of each 5S, 16S and 23S rRNA (45), and a gene coding for the 10Sa RNA. The conservation of the 10Sa RNA which functions as tRNA and mRNA and is implicated in *trans*-translation (66), is interesting in evolutionary terms. Three exceptions are

Table 4. List of the proposed ORFs, RNAs and REPs in numerical order starting with E07\_orf540o on the gene map (Fig. 1)

| Number | Genome Position  | Name         | Annotation                                                                 |
|--------|------------------|--------------|----------------------------------------------------------------------------|
| 001    | 663**815435 (c1) | E07_orf540o  | N-utilization substance protein A homolog (nusA); BACSU                    |
| 002    | 4681_740         | E07_orf1113  | MG146 homolog, MYCCE                                                       |
| 003    | 6641_4257        | E07_orf794   | putative lipoprotein, MG260 homolog, MYCCE                                 |
| 004    | 7325_8924        | E07_orf133   | -                                                                          |
| 005    | 8482_7808        | E07_orf234   | hypothetical 130k protein homolog (orf6, P1 operon); MYCPN                 |
|        | 8620_7896        | REPMP5       | repetitive DNA sequence REPMP5                                             |
| 006    | 9614_8310        | E07_orf434   | hypothetical 130k protein homolog (orf6, P1 operon); MYCPN                 |
| 007    | 10589_10147      | E07_orf140   | -                                                                          |
| 008    | 12589_11132      | E07_orf485   | MG260 homolog, MYCCE                                                       |
| 009    | 12923_12296      | E07_orf265   | MG260 homolog, MYCCE                                                       |
| 010    | 14250_13711      | E07_orf179   | -                                                                          |
| 011    | 15843_14682      | E07_orf413   | ADP1_MYCPN adhesin P1 precursor homolog; MYCPN                             |
|        | 16274_14754      | REPMP25      | repetitive DNA sequence REPMP25                                            |
| 012    | 16944_16417      | E07_orf175   | -                                                                          |
| 013    | 20717_17061      | E07_orf1218  | hypothetical 130k protein (orf6, P1 operon); MYCPN                         |
|        | 20717_18067      | REPMP3       | repetitive DNA sequence REPMP3                                             |
|        | 23580_21790      | REPMP23      | repetitive DNA sequence REPMP23                                            |
| 014    | 25606_20723      | E07_orf1627  | ADP1_MYCPN adhesin P1 (orf5, P1 operon); MYCPN                             |
|        | 25606_24060      | REPMP4       | repetitive DNA sequence REPMP4                                             |
| 015    | 26593_25619      | E07_orf324   | hypothetical 28k protein (orf4, P1 operon); MYCPN                          |
|        | 26823_27091      | REPMP1       | repetitive DNA sequence REPMP1                                             |
| 016    | 26844_27335      | E07_orf163   | -                                                                          |
| 017    | 27572_28072      | E07_orf166   | -                                                                          |
| 018    | 28321_29007      | E07_orf238   | -                                                                          |
| 019    | 30544_29585      | E07_orf519   | te-glycerol-3-phosphate transport system permease protein (aggE); ECOLI    |
| 020    | 31505_30516      | E07_orf229   | te-glycerol-3-phosphate transport system permease protein (aggA); ECOLI    |
| 021    | 32258_31498      | E07_orf586   | te-glycerol-3-phosphate transport system permease protein (aggC); ECOLI    |
| 022    | 34187_33282      | E07_orf261   | putative lipoprotein, MG186 homolog, MYCCE                                 |
|        | 35192_36457      | REPMP20      | repetitive DNA sequence REPMP20                                            |
| 023    | 35415_34645      | E07_orf256L  | ADP1_MYCPN adhesin P1 precursor homolog; MYCPN                             |
| 024    | 36796_37573      | E07_orf221V  | ADP1_MYCPN adhesin P1 precursor homolog; MYCPN                             |
|        | 37389_37148      | REPMP1       | repetitive DNA sequence REPMP1                                             |
| 025    | 37422_37000      | C09_orf148o  | -                                                                          |
|        | 38283_37921      | REPMP20      | repetitive DNA sequence REPMP20                                            |
| 026    | 38832_38383      | C09_orf148b  | adhesin P1 (group 2) homolog; MYCPN                                        |
| 027    | 39981_39532      | C09_orf148a  | -                                                                          |
|        | 40650_39538      | REPMP4       | repetitive DNA sequence REPMP4                                             |
| 028    | 41980_41438      | C09_orf180   | -                                                                          |
| 029    | 42851_42372      | C09_orf150   | MG207 homolog, MYCCE                                                       |
| 030    | 44447_42887      | C09_orf586L  | exonuclease ABC subunit C (xncC); BACSU                                    |
| 031    | 44676_45734      | C09_orf251   | protein (trcA) homolog, BACSU                                              |
| 032    | 48090_45721      | C09_orf789   | topoisomerase IV subunit A (topA); BACSU                                   |
| 033    | 49997_48090      | C09_orf830   | topoisomerase IV subunit B (topB); BACSU                                   |
|        | 50032_50105      | repA1        | Ttr-rRNA(GCU) gene; MYCPN                                                  |
| 034    | 50488_50123      | C09_orf121   | MG207 homolog, MYCCE                                                       |
| 035    | 51141_50488      | C09_orf217   | heat shock protein; CspE, HAEBN                                            |
| 036    | 51896_51164      | C09_orf910   | DnaJ homolog protein, MYCCA                                                |
| 037    | 54231_54562      | C09_orf143b  | MG109 homolog, MYCCE                                                       |
| 038    | 55020_54637      | C09_orf127   | ribosomal protein L20 (rpl20); MYCPE                                       |
| 039    | 55210_55011      | C09_orf99    | ribosomal protein L25 (rpl25); BACST                                       |
| 040    | 55821_55216      | C09_orf201   | translational initiation factor IF3 (infC); MYCPE                          |
| 041    | 57713_55911      | C09_orf800   | carbamate phosphoryltransferase II precursor (cp2); HUMAN                  |
| 042    | 58334_57703      | C09_orf223   | -                                                                          |
| 043    | 59315_58923      | C09_orf130b  | -                                                                          |
| 044    | 61443_60175      | C09_orf422   | -                                                                          |
| 045    | 64102_61947      | C09_orf718   | -                                                                          |
| 046    | 64524_64027      | C09_orf165   | -                                                                          |
| 047    | 66418_65204      | C09_orf404   | -                                                                          |
| 048    | 67175_66420      | C09_orf251   | -                                                                          |
| 049    | 69705_67288      | C09_orf825   | phenylalanyl-tRNA synthetase beta chain (pheT); BACSU                      |
| 050    | 70733_69738      | C09_orf341   | phenylalanyl-tRNA synthetase alpha-subunit (pheS); BACSU                   |
| 051    | 71881_71567      | C09_orf394   | (MG191) homolog, MYCCE                                                     |
| 052    | 71891_72409      | C09_orf172   | -                                                                          |
| 053    | 73096_72078      | C09_orf272   | hypothetical 130k protein homolog (orf6, P1 operon); MYCPN                 |
|        | 74668_72883      | REPMP5       | repetitive DNA sequence REPMP5                                             |
| 054    | 75998_74712      | C09_orf428V  | ADP1_MYCPN adhesin P1 precursor homolog; MYCPN                             |
|        | 76039_74736      | REPMP4       | repetitive DNA sequence REPMP4                                             |
|        | 76973_76691      | REPMP1       | repetitive DNA sequence REPMP1                                             |
| 055    | 77006_76455      | R02_orf183o  | -                                                                          |
| 056    | 78388_77345      | R02_orf247L  | ADP1_MYCPN adhesin P1 permease homolog; MYCPN                              |
|        | 79072_77697      | REPMP23      | repetitive DNA sequence REPMP23                                            |
| 057    | 79517_79074      | R02_orf147   | MG260 homolog, MYCCE                                                       |
| 058    | 81440_79415      | R02_orf241   | putative lipoprotein, MG260 homolog, MYCCE                                 |
| 059    | 82410_81616      | R02_orf264   | -                                                                          |
| 060    | 83174_82410      | R02_orf254   | -                                                                          |
|        | 83460_83358      | 5s rRNA      | 5S rRNA                                                                    |
|        | 86408_83682      | 23s rRNA     | 23S rRNA                                                                   |
|        | 88155_86632      | 16s rRNA     | 16S rRNA                                                                   |
| 061    | 90177_89735      | R02_orf140   | -                                                                          |
|        | 90202_89903      | REPMP1       | repetitive DNA sequence REPMP1                                             |
| 062    | 91516_90611      | R02_orf201   | hypothetical 130k protein homolog (orf6, P1 operon); MYCPN                 |
| 063    | 91892_91371      | R02_orf173   | hypothetical 130k protein homolog (orf6, P1 operon); MYCPN                 |
| 064    | 92626_92230      | R02_orf138   | -                                                                          |
|        | 93692_90643      | REPMP5       | repetitive DNA sequence REPMP5                                             |
| 065    | 93692_92703      | R02_orf329   | -                                                                          |
| 066    | 94854_93847      | R02_orf335   | type I restriction enzyme covald specificity protein (hae5) homolog; HAEBN |
| 067    | 95651_95346      | R02_orf101   | -                                                                          |
| 068    | 97118_96666      | R02_orf150   | -                                                                          |
| 069    | 97607_97290      | R02_orf105   | -                                                                          |
| 070    | 99191_97869      | R02_orf440   | -                                                                          |
| 071    | 100872_99258     | R02_orf324   | MG068 homolog, MYCCE                                                       |
| 072    | 102523_100922    | R02_orf253   | putative lipoprotein, MG067 homolog, MYCCE                                 |
| 073    | 104479_102533    | R02_orf648   | uracilase I (TK 1; tkR1); RHOSH                                            |
| 074    | 105897_104500    | R02_orf465   | glutamine transport ATP-binding protein (gluQ); ECOLI                      |
| 075    | 110057_105897    | R02_orf1386V | MG064 homolog, MYCCE                                                       |
| 076    | 111196_110294    | R02_orf700   | 1-phosphofructokinase (frk); HAEBN                                         |
| 077    | 112273_111189    | R02_orf694   | fructose-permease (IBC component) (fruA); ECOLI                            |
|        | 113324_113412    | mpgA2b       | Ser-tRNA gene (AGC); MYCPN                                                 |
| 078    | 113856_113265    | R02_orf469   | MG061 homolog, MYCCE                                                       |
| 079    | 115471_117165    | R02_orf564o  | hexosephosphate transport protein (hspT); SALT                             |
| 080    | 118116_117217    | D09_orf299   | hypothetical protein (ywdF) homolog; BACSU                                 |
| 081    | 118123_118566    | D09_orf147   | hypothetical protein (A43199) homolog; ENTHR                               |
| 082    | 118373_119379    | D09_orf588   | phosphoribosylpyrophosphate synthetase (prs); SYNPH                        |

Table 4. Continued

|     |                 |             |                                                                              |
|-----|-----------------|-------------|------------------------------------------------------------------------------|
| 083 | 119518..120054  | D09_orf178  | hypothetical protein (yabF) homolog; BACSU                                   |
| 084 | 120036..120666  | D09_orf276  | hypothetical protein (yabC) homolog; BACSU                                   |
| 085 | 120853..121236  | D09_orf127a | -                                                                            |
| 086 | 121404..121781  | D09_orf125  | MG055 homolog, MYCGE                                                         |
| 087 | 121789..122751  | D09_orf320  | transcription antitermination factor (tasG); BACSU                           |
| 088 | 124383..122719  | D09_orf554  | phosphomannosylase (pmaG); MYCPI                                             |
| 089 | 124774..124373  | D09_orf133  | cytidine deaminase (cdG); MYCPI                                              |
| 090 | 126050..124785  | D09_orf421  | thymidine phosphorylase (deoA); MYCPI                                        |
| 091 | 126711..126037  | D09_orf224  | deoxyribose-phosphate aldolase (deoC); MYCPI                                 |
| 092 | 127431..126715  | D09_orf238  | purine-nucleoside phosphorylase (deoD); ECOLI                                |
| 093 | 127487..128839  | D09_orf450  | signal recognition particle protein (fih); MYCPI                             |
| 094 | 130278..129127  | D09_orf383  | S-adenosylmethionine synthetase 2 (metX); ECOLI                              |
| 095 | 131221..130362  | D09_orf319  | o-sialoglycoprotein endopeptidase (gcp); PASHA                               |
| 096 | 132678..131221  | D09_orf485  | putative lipoprotein, MG045 homolog, MYCGE                                   |
| 097 | 133523..132663  | D09_orf286a | spermidine/putrescine transport system permease (pot2); ECOLI                |
| 098 | 134376..133516  | D09_orf286b | spermidine/putrescine transport system permease (pot3); HAEIN                |
| 099 | 136060..134378  | D09_orf560L | spermidine/putrescine transport ATP-binding prot (potA); ECOLI               |
| 100 | 137837..137466  | D09_orf123  | putative lipoprotein                                                         |
| 101 | 139642..139376  | D09_orf188  | phosphocarrier protein HPr (ptsH); MYCCA                                     |
| 102 | 141633..139660  | D09_orf657  | putative lipoprotein, MG040 homolog, MYCGE                                   |
| 103 | 141816..142970  | D09_orf384  | aerobic glycerol-3-phosphate dehydrogenase (glpD); ECOLI                     |
| 104 | 142961..144487  | D09_orf508  | glycerol kinase (glpK); HAEIN                                                |
| 105 | 146845..144947  | D09_orf632  | MG288 homolog, MYCGE                                                         |
| 106 | 148578..147022  | D09_orf518  | MG096 homolog, MYCGE                                                         |
| 107 | 150522..149167  | D09_orf451  | pre-B cell enhancing factor homolog (pheF); HUMAN                            |
| 108 | 152171..150498  | D09_orf357  | aspartyl-tRNA synthetase (aspS); THEAQ                                       |
| 109 | 153387..152143  | D09_orf414a | histidyl-tRNA synthetase (hisS); STRBQ                                       |
| 110 | 153414..153989  | B01_orf191  | thymidine kinase (tdk); BACSU                                                |
| 111 | 154830..154036  | B01_orf264  | glycerol upstroke facilitator (glpF); BACSU                                  |
| 112 | 157172..155154  | B01_orf672  | MG032 homolog, MYCGE                                                         |
| 113 | 157794..157234  | B01_orf186L | MG032 homolog, MYCGE                                                         |
| 114 | 158048..158339  | B01_orf103b | -                                                                            |
| 115 | 159270..158254  | B01_orf338  | MG032 homolog, MYCGE                                                         |
| 116 | 159672..160020  | B01_orf116L | -                                                                            |
|     | 160267..160532  | REPMP1      | repetitive DNA sequence REPMP1                                               |
| 117 | 160694..160251  | B01_orf147  | -                                                                            |
| 118 | 162883..160662  | B01_orf673  | MG032 homolog, MYCGE                                                         |
| 119 | 165055..163035  | B01_orf666  | MG032 homolog, MYCGE                                                         |
| 120 | 165333..169964  | B01_orf1443 | DNA polymerase III (dnaE) alpha chain (3'-5' exonuclease); BACSU             |
| 121 | 169788..170324  | B01_orf178  | uracil phosphoribosyltransferase (upp); STRSL                                |
| 122 | 170328..170654  | B01_orf108  | hypothetical protein (gi: 606093) homolog; ECOLI                             |
| 123 | 171489..170678  | B01_orf203  | MG028 homolog, MYCGE                                                         |
| 124 | 171995..171489  | B01_orf168  | MG027 homolog, MYCGE                                                         |
| 125 | 172485..171913  | B01_orf190  | elongation factor P (efp) homolog; HAEIN                                     |
| 126 | 173405..172506  | B01_orf299V | TrnB protein; YEREN                                                          |
| 127 | 173438..174262  | B01_orf274  | -                                                                            |
| 128 | 175333..174265  | B01_orf362  | hypothetical protein (yaaF) homolog; BACSU                                   |
| 129 | 176220..175354  | B01_orf288  | fructose-bisphosphate aldolase (fru); BACSU                                  |
| 130 | 176660..176220  | B01_orf146  | DNA-directed RNA polymerase delta subunit (rpoE); BACSU                      |
| 131 | 178219..176681  | B01_orf512  | methionyl-tRNA synthetase (metS); BACST                                      |
| 132 | 179148..178219  | B01_orf309  | proline iminopeptidase (pip); NEI6Q                                          |
| 133 | 180304..179132  | D12_orf390b | heat shock protein DnaJ; BACSU                                               |
| 134 | 183442..180350  | D12_orf1030 | hypothetical helicase (y695) homolog; YEAST                                  |
| 135 | 183536..183452  | D12_orf634  | transport ATP-binding protein (mabA); HAEIN                                  |
| 136 | 187139..185268  | D12_orf623  | transport ATP-binding protein (gmd1); SCHPO                                  |
|     | 187233..187390  | mpigi       | Ile-tRNA(ATC), Ala-tRNA(GCA) genes; MYCPI                                    |
| 137 | 187475..188284  | D12_orf269  | 5,10-methylene-tetrahydrofolate dehydrogenase (mid1); HAEIN                  |
| 138 | 188259..189125  | D12_orf288  | ribosomal protein S6 modification protein (rimK); ECOLI                      |
| 139 | 189125..189982  | D12_orf285  | MG011 homolog, MYCGE                                                         |
| 140 | 190997..189939  | D12_orf212  | DNA primase motif (dnaG); CLOAB                                              |
| 141 | 191472..190699  | D12_orf257  | -                                                                            |
| 142 | 192199..192906  | D12_orf235  | -                                                                            |
| 143 | 192931..193626  | D12_orf231  | putative lipoprotein                                                         |
| 144 | 194207..193812  | D12_orf131  | -                                                                            |
| 145 | 195189..194404  | D12_orf261  | hypothetical protein (yabD) homolog; BACSU                                   |
| 146 | 196517..195189  | D12_orf442  | possible thiophene and furan oxidation protein (tdhF); BACSU                 |
| 147 | 197280..196519  | D12_orf253  | DNA polymerase III subunit delta' (hoB); ECOLI                               |
| 148 | 197885..197253  | D12_orf210  | thymidylate kinase (CDK) homolog, MYCGE                                      |
| 149 | 199152..197890  | D12_orf420  | seryl-tRNA synthetase (serS); BACSU                                          |
| 150 | 201643..199124  | K05_orf839a | DNA gyrase subunit A (gyrA); STAAU                                           |
| 151 | 203395..201643  | K05_orf650  | DNA gyrase subunit B (gyrB); MYCPI                                           |
| 152 | 204626..203697  | K05_orf309  | DnaJ homolog protein; YEAST                                                  |
| 153 | 205772..204630  | K05_orf380  | DNA polymerase III beta subunit (dnaN); STAAU                                |
| 154 | 206520..207332  | K05_orf270  | protein (soj) homolog; BACSU                                                 |
| 155 | 207319..208071  | K05_orf250  | -                                                                            |
| 156 | 208071..209390  | K05_orf439  | chromosomal replication initiator protein (dnaA); MYCCA                      |
| 157 | 209458..210312  | K05_orf284  | sulfate transport ATP-binding protein (cysA); SYNPI                          |
| 158 | 210318..2115966 | K05_orf1882 | -                                                                            |
| 159 | 215968..2116987 | K05_orf339  | protein (devA) homolog; ANASP                                                |
| 160 | 217010..217156  | K05_orf48   | ribosomal protein L34 (rpl34); PROMI                                         |
| 161 | 217146..217502  | K05_orf118V | RNaseP C5 chain (rnpA); MYCCA                                                |
| 162 | 217483..218640  | K05_orf385  | hypothetical protein I (S42122); MYCCA                                       |
| 163 | 218633..219424  | K05_orf263V | S-adenosylmethionine-6-N,N'-adenosyl(rRNA) dimethyltransferase (tagA); ECOLI |
| 164 | 219411..220865  | K05_orf484  | glutaryl-tRNA synthetase (glxX); BACST                                       |
| 165 | 220846..222123  | K05_orf425  | MG461 homolog, MYCGE                                                         |
| 166 | 223000..222680  | K05_orf106  | -                                                                            |
| 167 | 223391..223496  | K05_orf101a | -                                                                            |
| 168 | 225039..224101  | K05_orf312  | L-lactate dehydrogenase (ldh); MYCHY                                         |
| 169 | 225210..225719  | K05_orf169  | hypothetical protein (H0671) homolog; HAEIN                                  |
| 170 | 225719..226246  | K05_orf175  | hypoxanthine-guanine phosphoribosyltransferase (hpt); LACLA                  |
| 171 | 226427..228356  | K05_orf709  | cell division protein (ftsH); BACSU                                          |
| 172 | 229109..230146  | K05_orf345  | MG456 homolog, MYCGE                                                         |
| 173 | 231385..230186  | K05_orf399  | tyrosyl tRNA synthetase (tyrS); BACCA                                        |
| 174 | 231411..231833  | K05_orf140  | osmotically inducible protein (omrC); ECOLI                                  |
| 175 | 232705..231830  | K05_orf291  | UDP-glucose pyrophosphorylase (gtaB); BACSU                                  |
| 176 | 233448..232693  | K05_orf251  | MG452 homolog, MYCGE                                                         |
| 177 | 233533..234717  | K05_orf394  | elongation factor TU (tu); MYCGE                                             |
| 178 | 234876..235589  | K05_orf237  | homolog (degV) protein; BACSU                                                |
| 179 | 235596..236300  | K05_orf234  | MG449 homolog, MYCGE                                                         |
| 180 | 236264..236719  | K05_orf151  | pi18 homolog (fragment); HAEIN                                               |
| 181 | 236870..238369  | K05_orf499  | MG447 homolog, MYCGE                                                         |
| 182 | 238451..238717  | K05_orf788  | ribosomal protein S16 (BS17); BACSU                                          |
| 183 | 238783..239415  | K05_orf210  | tRNA (guanine-N1)-methyltransferase (trmD); HUMAN                            |
| 184 | 239399..239758  | K05_orf119  | ribosomal protein L19 (rpl19); BACST                                         |

Table 4. Continued

|     |                |              |                                                                                 |
|-----|----------------|--------------|---------------------------------------------------------------------------------|
| 183 | 239774..240979 | K05_orf401   | hypothetical protein (P27712); SPIC1                                            |
| 186 | 240948..241763 | K05_orf271   | MG442 homolog, MYCGE                                                            |
| 187 | 242850..242236 | E09_orf204o  | protein P30, MYCPN                                                              |
| 188 | 243127..243516 | E09_orf129   | putative lipoprotein                                                            |
| 189 | 244320..243889 | E09_orf143V  | PTS system mannitol-specific component IIA (EIIA-MTL)(mtlP); STRMU              |
| 190 | 245395..244301 | E09_orf364   | mannitol-1-phosphate 5-dehydrogenase (EC 1.1.1.17)(mtlD); STRMU                 |
| 191 | 246521..245382 | E09_orf379   | PTS system mannitol-specific component IIA (EIIA-MTL)(mtlA); STACA              |
| 192 | 247519..247824 | E09_orf101   | putative lipoprotein                                                            |
| 193 | 247809..248219 | E09_orf136L  | -                                                                               |
| 194 | 249106..249516 | E09_orf136   | MG441 homolog, MYCGE                                                            |
| 195 | 249627..250499 | E09_orf290   | putative lipoprotein, MG439 homolog, MYCGE                                      |
| 196 | 250522..251355 | E09_orf277   | putative lipoprotein, MG440 homolog, MYCGE                                      |
| 197 | 251355..252206 | E09_orf283a  | putative lipoprotein, MG439 homolog, MYCGE                                      |
| 198 | 252209..253060 | E09_orf283b  | putative lipoprotein, MG439 homolog, MYCGE                                      |
| 199 | 252981..253889 | E09_orf302   | MG440 homolog, MYCGE                                                            |
| 200 | 253889..254782 | E09_orf279   | putative lipoprotein, MG439 homolog, MYCGE                                      |
| 201 | 254731..255561 | E09_orf276   | putative lipoprotein, MG440 homolog, MYCGE                                      |
| 202 | 255561..256463 | E09_orf300   | putative lipoprotein, MG439 homolog, MYCGE                                      |
| 203 | 256471..257334 | E09_orf287o  | MG439 homolog, MYCGE                                                            |
| 204 | 258458..257331 | E30_orf375   | MG438 homolog, MYCGE                                                            |
| 205 | 259665..258478 | E30_orf395   | CDP-diglyceride synthetase (cdsA); HAEIN                                        |
| 206 | 260219..259665 | E30_orf184   | ribosome releasing factor (rrf); HAEIN                                          |
| 207 | 261354..260296 | E30_orf352   | -                                                                               |
| 208 | 262455..261910 | C12_orf181o  | -                                                                               |
| 209 | 263280..262537 | C12_orf247   | -                                                                               |
| 210 | 264090..263383 | C12_orf235   | uridylylase kinase (pyrH); ECOLI                                                |
| 211 | 264988..264092 | C12_orf298   | elongation factor Ts (tsf); SPIC1                                               |
| 212 | 265075..266289 | C12_orf404   | hypothetical protein (y6B) homolog; SPIC1                                       |
| 213 | 266342..267076 | C12_orf244   | triosephosphate isomerase (tim); ECOLI                                          |
| 214 | 267069..268595 | C12_orf508   | phosphoglycerate mutase (pgm); BACSU                                            |
| 215 | 268600..270318 | C12_orf572   | PEP-dependent HPr protein kinase phosphoryltransferase (Enzyme D) (ptsI); STRSL |
| 216 | 270833..270315 | C12_orf172   | MG428 homolog, MYCGE                                                            |
| 217 | 271393..270968 | C12_orf141   | MG427 homolog, MYCGE                                                            |
| 218 | 271634..271437 | C12_orf165   | ribosomal protein L28 (rplL28); BACSU                                           |
| 219 | 273008..271856 | C12_orf450   | ATP-dependent RNA helicase (dead); HAEIN                                        |
| 220 | 273166..273426 | C12_orf186   | ribosomal protein S15 (rslS15); BACST                                           |
| 221 | 273431..275116 | C12_orf561   | MG423 homolog, MYCGE                                                            |
| 222 | 275162..590313 | C12_orf839   | MG422 homolog, MYCGE                                                            |
| 223 | 277659..280505 | C12_orf948L  | excinuclease ABC subunit A (uvrA); ECOLI                                        |
| 224 | 280514..282539 | C12_orf681   | DNA polymerase III subunit gamma and tau (dnaX); ECOLI                          |
| 225 | 282590..283030 | C12_orf146   | ribosomal protein L13 (rplL13); ECOLI                                           |
| 226 | 283036..283434 | C12_orf132   | ribosomal protein S9 (rps9); BACST                                              |
| 227 | 283864..284613 | C12_orf249   | restriction-modification enzyme subunit S1B (hsdS); MYCPCU                      |
| 228 | 284699..285703 | C12_orf334   | MG413 homolog, MYCGE                                                            |
| 229 | 285639..286673 | C12_orf344   | MG415 homolog, MYCGE                                                            |
| 230 | 286788..289781 | C12_orf997   | MG414 homolog, MYCGE                                                            |
| 231 | 290023..291180 | C12_orf385   | MG412 homolog, MYCGE                                                            |
| 232 | 291180..293135 | C12_orf651V  | phosphate transport system permease protein (ptaA); ECOLI                       |
| 233 | 293120..294109 | C12_orf329   | phosphate transport ATP-binding protein (ptaB); ECOLI                           |
| 234 | 294112..294789 | C12_orf225   | phosphate transport system regulatory protein (ptaU); ECOLI                     |
| 235 | 295259..294786 | C12_orf157   | peptide methionine sulfoxide reductase (pmsR); ECOLI                            |
| 236 | 295314..296684 | C12_orf456   | evoluate (eao) (EC 4.2.1.11); PLARA                                             |
| 238 | 297129..298010 | C12_orf293o  | ATP synthase A chain (atpB); MYCGA                                              |
| 237 | 297163..296690 | C12_orf137L  | ATP synthase protein I (atpI); MYCGA                                            |
| 239 | 298013..298530 | D02_orf105   | ATP synthase C chain (atpC); MYCGA                                              |
| 240 | 298333..298956 | D02_orf207   | ATP synthase B chain (atpB); MYCGA                                              |
| 241 | 298949..299485 | D02_orf178   | ATP synthase delta chain (atpD); MYCGA                                          |
| 242 | 299488..301044 | D02_orf518   | ATP synthase alpha chain (atpA); MYCGA                                          |
| 243 | 301044..301883 | D02_orf279   | ATP synthase gamma chain (atpG); MYCGA                                          |
| 244 | 301883..303310 | D02_orf475   | ATP synthase beta chain (atpE); MYCGA                                           |
| 245 | 303313..303714 | D02_orf133a  | ATP synthase epsilon chain (atpH); MYCGA                                        |
| 246 | 303714..305423 | D02_orf569   | MG397 homolog, MYCGE                                                            |
| 247 | 305423..305881 | D02_orf152   | galactose-6-phosphate isomerase subunit (lacA); STRMU                           |
| 248 | 305799..306167 | D02_orf122a  | -                                                                               |
| 249 | 306393..306761 | D02_orf122b  | -                                                                               |
| 250 | 306862..308427 | D02_orf521   | putative lipoprotein, MG395 homolog, MYCGE                                      |
| 251 | 308950..310011 | D02_orf533V  | MG068 homolog, MYCGE                                                            |
| 252 | 310168..310821 | D02_orf217L  | putative lipoprotein, MG395 homolog, MYCGE                                      |
| 253 | 310962..311435 | D02_orf157L  | MG395 homolog, MYCGE                                                            |
| 254 | 311648..313243 | D02_orf531   | putative lipoprotein, MG395 homolog, MYCGE                                      |
| 255 | 313301..313753 | D02_orf150   | MG068 homolog, MYCGE                                                            |
| 256 | 313629..314672 | D02_orf347   | MG067 homolog, MYCGE                                                            |
| 257 | 314746..315654 | D02_orf302   | putative lipoprotein, MG068 homolog, MYCGE                                      |
| 258 | 315716..316123 | D02_orf135L  | MG067 homolog, MYCGE                                                            |
| 259 | 316627..317304 | D02_orf225L  | MG068 homolog, MYCGE                                                            |
| 260 | 317742..319061 | D02_orf439   | putative lipoprotein, MG068 homolog, MYCGE                                      |
| 261 | 319237..320034 | D02_orf265V  | MG068 homolog, MYCGE                                                            |
| 262 | 320102..320524 | D02_orf140   | MG395 homolog, MYCGE                                                            |
| 263 | 320666..320995 | D02_orf109   | -                                                                               |
| 264 | 321313..321011 | D02_orf100   | -                                                                               |
| 265 | 321751..322791 | D02_orf346   | MG068 homolog, MYCGE                                                            |
| 266 | 322953..324173 | D02_orf406   | serine hydroxymethyltransferase (glyA); ACTAC                                   |
| 267 | 324608..324994 | D02_orf128   | -                                                                               |
| 268 | 325182..325532 | D02_orf116   | heat shock protein GroES; BACSU                                                 |
| 269 | 325535..327166 | D02_orf543   | heat shock protein GroEL; BACSU                                                 |
| 270 | 327180..328517 | D02_orf445   | nonspecific aminopeptidase; MYCSA                                               |
| 271 | 328621..330603 | D02_orf660   | lactococcal transport ATP-binding protein (lcaDR3); LACLA                       |
| 272 | 330605..330994 | D02_orf129   | MG389 homolog, MYCGE                                                            |
| 273 | 331116..331442 | D02_orf108   | MG388 homolog, MYCGE                                                            |
| 274 | 331430..332305 | D02_orf291   | GTP-binding protein era homolog; STRMU                                          |
| 275 | 332405..335515 | D02_orf1036o | protein P20; MYCPN                                                              |
| 276 | 335519..336232 | H03_orf237   | glycerophosphoryl diester phosphodiesterase (glpQ); STAAU                       |
| 277 | 336402..336860 | H03_orf132   | -                                                                               |
| 278 | 337074..338129 | H03_orf351   | NADP-dependent alcohol dehydrogenase (adh); THEBR                               |
| 279 | 338333..339634 | H03_orf433   | GTP-binding protein (cbg); BACSU                                                |
| 280 | 339627..340373 | H03_orf248   | probable NHG-dependent NAD(+) synthetase (oufB); BACSU                          |
| 281 | 341011..340370 | H03_orf213   | uridine kinase (udk); HAEIN                                                     |
| 282 | 341065..342381 | H03_orf438   | arginine deiminase (aroA); PSEPU                                                |
| 283 | 342382..342432 | mpgab        | Arg-tRNA gene (AGA); MYCPN                                                      |
| 284 | 343166..342459 | H03_orf235   | MG381 homolog, MYCGE                                                            |
| 285 | 343695..343120 | H03_orf191   | glucose inhibited division protein (gidB); ECOLI                                |
| 286 | 345526..343688 | H03_orf612   | glucose inhibited division protein (gidA); ECOLI                                |
| 287 | 345554..347167 | H03_orf537   | arginyl-tRNA synthetase (argS); BRELA                                           |
| 287 | 347210..347791 | H03_orf193o  | MG377 homolog (put. zinc protease), MYCGE                                       |



Table 4. Continued

|     |                |              |                                                                                  |
|-----|----------------|--------------|----------------------------------------------------------------------------------|
| 288 | 347793..348107 | G12_orf104   | MG376 homolog, MYCGB                                                             |
| 289 | 348107..349801 | G12_orf564   | threonyl-tRNA synthetase (thrSv); BACSU                                          |
| 290 | 349794..350603 | G12_orf269   | MG374 homolog, MYCGB                                                             |
| 291 | 350610..351455 | G12_orf281   | MG373 homolog, MYCGB                                                             |
| 292 | 351442..352605 | G12_orf387   | MG372 homolog, MYCGB                                                             |
| 293 | 352598..353575 | G12_orf325   | hypothetical 28K protein (P1 operon) homolog; MYCPN                              |
| 294 | 353562..354542 | G12_orf326   | hypothetical protein (H0076) homolog; HAEIN                                      |
| 295 | 354597..356273 | G12_orf558   | MG369 homolog, MYCGB                                                             |
| 296 | 356273..357259 | G12_orf328a  | fatty acid/phospholipid synthesis protein (plaX); ECOLI                          |
| 297 | 357249..358097 | G12_orf282a  | ribonuclease III (rnc); ECOLI                                                    |
| 298 | 360075..358081 | G12_orf664   | MG366 homolog, MYCGB                                                             |
| 299 | 361010..360075 | G12_orf311   | methionyl-tRNA formyltransferase (fm); ECOLI                                     |
| 300 | 361671..361015 | G12_orf218   | MG364 homolog, MYCGB                                                             |
| 301 | 361732..361995 | G12_orf87    | ribosomal protein S20 (rpsT); ECOLI                                              |
| 302 | 362178..362005 | G12_orf57    | ribosomal protein L32 (rplL32); HAEIN                                            |
| 303 | 362553..362185 | G12_orf122   | ribosomal protein L7/L12 (L7 type) (rplL7/L12); MICLU                            |
| 304 | 363076..362591 | G12_orf161   | ribosomal protein L10 (rplL10); THEMA                                            |
| 305 | 363194..364432 | G12_orf412   | UV protection protein (mucB); ECOLI                                              |
| 306 | 365341..364418 | G12_orf307   | Holliday junction DNA helicase (rvrB); HAEIN                                     |
| 307 | 365936..365316 | G12_orf206   | Holliday junction DNA helicase (rvrA); ECOLI                                     |
| 308 | 366364..365942 | G12_orf140b  | -                                                                                |
| 309 | 366705..367877 | G12_orf390   | acetate kinase (ackA); BACSU                                                     |
| 310 | 367885..368733 | G12_orf282b  | LicA protein (licA) homolog; HAEIN                                               |
| 311 | 368909..371056 | G12_orf715   | ATP-dependent protease binding subunit (clpB) homolog; HAEIN                     |
| 312 | 371463..371053 | G12_orf136   | MG354 homolog, MYCGB                                                             |
| 313 | 371612..371941 | G12_orf109   | MG353 homolog, MYCGB                                                             |
| 314 | 373019..372465 | G12_orf184   | inorganic pyrophosphatase (ppa); THEAC                                           |
| 315 | 373074..373751 | G12_orf223   | -                                                                                |
| 316 | 374992..374006 | G12_orf328b  | MG350 homolog, MYCGB                                                             |
| 317 | 376214..374973 | G12_orf413   | MG349 homolog, MYCGB                                                             |
| 318 | 376807..377313 | G12_orf168   | -                                                                                |
|     | 376824..377060 | REPMP1       | repetitive DNA sequence REPMP1                                                   |
| 319 | 377903..378820 | G12_orf305   | putative lipoprotein, MG348 homolog, MYCGB                                       |
|     | 378870..378945 | mpgB         | His-URA (CAC) gene; MYCPN                                                        |
| 320 | 379607..378975 | G12_orf210V  | hypothetical protein (H0340) homolog; HAEIN                                      |
| 321 | 380098..379598 | G12_orf166b  | hypothetical protein (yjl3) homolog; BACST                                       |
| 322 | 380141..382726 | G12_orf861   | isoleucine-tRNA ligase (ileS); STAAU                                             |
| 323 | 382844..383662 | G12_orf272V  | triacylglycerol lipase (lip) 3; MYCMY                                            |
| 324 | 383665..384711 | G12_orf348   | MG343 homolog, MYCGB                                                             |
| 325 | 385804..386304 | G12_orf166a  | MG342 homolog, MYCGB                                                             |
| 326 | 386397..390572 | G12_orf139Lo | RNA polymerase beta subunit (rpoB); BACSU                                        |
| 327 | 390576..394448 | FO4_orf1290  | DNA-directed RNA polymerase beta' chain (rpoC); THEMA                            |
| 328 | 394610..394972 | FO4_orf120   | -                                                                                |
| 329 | 395489..395941 | FO4_orf150   | -                                                                                |
| 330 | 396719..397183 | FO4_orf154   | MG288 homolog, MYCGB                                                             |
| 331 | 397214..397996 | FO4_orf260V  | MG288 homolog, MYCGB                                                             |
| 332 | 398608..399984 | FO2_orf458   | MG096 homolog, MYCGB                                                             |
| 333 | 401014..402297 | FO2_orf427   | MG288 homolog, MYCGB                                                             |
| 334 | 402844..404373 | FO2_orf509   | MG288 homolog, MYCGB                                                             |
| 335 | 405492..404401 | FO2_orf363V  | type I restriction enzyme <i>ecolI</i> specificity protein (hadS) homolog; HAEIN |
| 336 | 407993..405612 | FO2_orf793   | putative lipoprotein, MG260 homolog, MYCGB                                       |
| 337 | 408809..409670 | FO1_orf253   | -                                                                                |
| 338 | 410118..409738 | FO2_orf126   | -                                                                                |
| 339 | 411833..410688 | FO2_orf381   | hypothetical 130K protein homolog (orf6, P1 operon); MYCPN                       |
|     | 412343..410580 | REPMP5       | repetitive DNA sequence REPMP5                                                   |
| 340 | 413656..412388 | FO2_orf422V  | ADP1_MYCPN adhesin P1 precursor homolog; MYCPN                                   |
|     | 413701..412404 | REPMP4       | repetitive DNA sequence REPMP4                                                   |
| 341 | 414691..414101 | FO2_orf196   | -                                                                                |
|     | 414718..414417 | REPMP1       | repetitive DNA sequence REPMP1                                                   |
| 342 | 416640..415037 | FO2_orf527V  | ADP1_MYCPN adhesin P1 precursor homolog; MYCPN                                   |
|     | 416770..415161 | REPMP2/3     | repetitive DNA sequence REPMP2/3                                                 |
| 343 | 417279..416788 | FO2_orf163   | -                                                                                |
| 344 | 417961..417233 | FO2_orf242   | L-ribulose-5-phosphate 4-epimerase (ard); ECOLI                                  |
| 345 | 418272..418703 | FO2_orf143   | -                                                                                |
| 346 | 419131..421113 | FO2_orf660   | hypothetical protein (yjl5) homolog; ECOLI                                       |
| 347 | 421405..421884 | FO2_orf159   | hypothetical phosphotransferase protein (yjlU) homolog; ECOLI                    |
| 348 | 421886..422542 | FO2_orf218   | hypothetical protein (yjlV) homolog; ECOLI                                       |
| 349 | 422478..423395 | FO2_orf305   | hypothetical protein (yjlW) homolog; ECOLI                                       |
| 350 | 424958..423534 | FO2_orf474   | -                                                                                |
| 351 | 425032..426042 | FO2_orf336   | recombination protein (recA); STAAU                                              |
| 352 | 426558..430460 | FO2_orf1300  | putative lipoprotein, MG338 homolog, MYCGB                                       |
| 353 | 431060..430638 | FO2_orf140   | MG337 homolog, MYCGB                                                             |
| 354 | 432289..431063 | FO2_orf408   | nitrogen fixation protein (nifS); HAEIN                                          |
| 355 | 432878..433828 | FO2_orf316   | MG338 homolog, MYCGB                                                             |
|     | 432936..432493 | FO2_orf147   | -                                                                                |
|     | 434119..434385 | REPMP1       | repetitive DNA sequence REPMP1                                                   |
| 357 | 434245..434556 | FO2_orf103b  | -                                                                                |
| 358 | 436086..435061 | FO1_orf341   | hypothetical protein (yibD) homolog; ECOLI                                       |
| 359 | 436374..436955 | FO1_orf193   | hypothetical protein (yihA) (era like) homolog; ECOLI                            |
| 360 | 436939..439455 | FO1_orf838   | valyl-tRNA synthetase (valS); BACST                                              |
| 361 | 439483..440076 | FO1_orf197   | hypothetical protein (HI1366) homolog; HAEIN                                     |
| 362 | 440080..440787 | FO1_orf235   | hypothetical protein (H0315) homolog; HAEIN                                      |
| 363 | 440790..441419 | FO1_orf209   | MG331 homolog, MYCGB                                                             |
| 364 | 441446..442099 | FO1_orf217   | cytidylate kinase (cmk); BACSU                                                   |
| 365 | 442572..443450 | FO1_orf292   | hypothetical protein (H0136) (era like) homolog; HAEIN                           |
| 366 | 443807..446908 | FO1_orf1033  | MG328 homolog, MYCGB                                                             |
| 367 | 446895..447701 | FO1_orf268   | triacylglycerol lipase (lip) 2; MYCMY                                            |
| 368 | 447707..448588 | FO1_orf293   | homolog (degV) protein; BACSU                                                    |
| 369 | 448607..448768 | FO1_orf53    | ribosomal protein L33 (rplL33); BACST                                            |
| 370 | 448768..449832 | FO1_orf354   | X-Pro dipeptidase (pepX); LACDE                                                  |
| 371 | 449873..450604 | FO1_orf243   | -                                                                                |
|     | 450647..451033 | 10saRNA      | 10saRNA; MYCGB                                                                   |
|     | 451297..451058 | mpB RNA      | RNaseP RNA; MYCGB                                                                |
| 372 | 452076..451450 | FO1_orf208V  | ADP1_MYCPN adhesin P1 precursor homolog; MYCPN                                   |
| 373 | 452813..453118 | FO1_orf101   | putative lipoprotein                                                             |
| 374 | 453148..453570 | FO1_orf140   | -                                                                                |
| 375 | 453614..454213 | FO1_orf199   | -                                                                                |
|     | 454252..453959 | REPMP1       | repetitive DNA sequence REPMP1                                                   |
| 376 | 455967..454630 | H08_orf445   | hypothetical 130K protein homolog (orf6, P1 operon); MYCPN                       |
| 377 | 456734..456261 | H08_orf157a  | -                                                                                |
|     | 456769..454719 | REPMP5       | repetitive DNA sequence REPMP5                                                   |
| 378 | 457621..456809 | H08_orf270   | ADP1_MYCPN adhesin P1 precursor homolog; MYCPN                                   |
|     | 457770..456825 | REPMP4       | repetitive DNA sequence REPMP4                                                   |
| 379 | 458468..457773 | H08_orf231   | hypothetical protein (yzaC) homolog; BACSU                                       |

Table 4. Continued

|     |                                |                   |                                                                                                                                                                           |
|-----|--------------------------------|-------------------|---------------------------------------------------------------------------------------------------------------------------------------------------------------------------|
| 380 | 458523-460200<br>460165-460885 | H08_or565<br>mpga | Na(+)-translocating ATPase subunit 7 (nig7); ENT1B<br>Asn-tRNA(AAC), Glu-tRNA(GAA), Thr-tRNA(ACG), Val-tRNA(GTA), Thr-tRNA(AAC) Lys-tRNA(AAG), Leu-tRNA(CTA) genes; MYCPN |
| 381 | 460960-462735                  | H08_or591         | MG321 homolog, MYCGE                                                                                                                                                      |
| 382 | 462656-463129                  | H08_or157b        | MG321 homolog, MYCGE                                                                                                                                                      |
| 383 | 463071-464060                  | H08_or329V        | adhesin P1 (group 2) homolog; MYCPN                                                                                                                                       |
| 384 | 464443-465460                  | H08_or1005        | putative lipoprotein, MG321 homolog, MYCGE                                                                                                                                |
|     | 467634-467717                  | mpga              | Ser-tRNA(TCC), Ser-tRNA(TCG) genes; MYCPN                                                                                                                                 |
| 385 | 467786-468549                  | H08_or287         | (cytochrome C oxidase polypeptide I (coxI); BACSU)                                                                                                                        |
| 386 | 468738-469319                  | H08_or193         | MG319 homolog, MYCGE                                                                                                                                                      |
| 387 | 469340-470164                  | H08_or234         | 30K adhesin-related protein; MYCPN                                                                                                                                        |
| 388 | 470178-472196                  | H08_or672         | cytadherence accessory protein (hsw3); MYCPN                                                                                                                              |
| 389 | 472235-473345                  | H08_or369         | (competence locus II (comE2); BACSU)                                                                                                                                      |
| 390 | 473324-474168                  | H08_or314         | MG315 homolog, MYCGE                                                                                                                                                      |
| 391 | 474180-475526                  | H08_or448         | MG314 homolog, MYCGE                                                                                                                                                      |
| 392 | 475643-476434                  | H08_or363         | MG313 homolog, MYCGE                                                                                                                                                      |
| 393 | 476488-478554                  | H08_or1018        | cytadherence accessory protein (hsw1); MYCPN                                                                                                                              |
| 394 | 479577-480194                  | H08_or305         | ribosomal protein S4 (rps4); BACSU                                                                                                                                        |
| 396 | 481119-483096                  | H08_or3325        | putative lipoprotein, MG309 homolog, MYCGE                                                                                                                                |
| 395 | 481124-483255                  | H08_or289         | triacylglycerol lipase (tly) 3; Mycoplasma sp                                                                                                                             |
| 397 | 485303-486332                  | H08_or409         | ATP-dependent RNA helicase (hwd); ECOLI                                                                                                                                   |
| 398 | 486317-488769                  | H08_or150         | putative lipoprotein, MG307 homolog, MYCGE                                                                                                                                |
| 399 | 487390-487083                  | H08_or102         | -                                                                                                                                                                         |
| 400 | 487860-490040                  | H08_or726         | MG307 homolog, MYCGE                                                                                                                                                      |
| 401 | 490196-490909                  | H08_or237         | putative lipoprotein, MG307 homolog, MYCGE                                                                                                                                |
| 402 | 490965-492002                  | H08_or345         | MG307 homolog, MYCGE                                                                                                                                                      |
| 403 | 492220-493938                  | H08_or372b        | MG307 homolog, MYCGE                                                                                                                                                      |
| 404 | 494247-497981                  | A05_or1244        | putative lipoprotein, MG307 homolog, MYCGE                                                                                                                                |
| 405 | 497991-499178                  | A05_or395         | MG306 homolog, MYCGE                                                                                                                                                      |
| 406 | 499234-501021                  | A05_or395         | heat shock protein DnaK, ERK9H                                                                                                                                            |
| 407 | 501179-501991                  | A05_or270L        | abc transport ATP-binding protein (abcD), SALT                                                                                                                            |
| 408 | 501886-503004                  | A05_or382         | abc transport ATP-binding protein (abcP); ECOLI                                                                                                                           |
| 409 | 503024-503977                  | A05_or317         | MG302 homolog, MYCGE                                                                                                                                                      |
| 410 | 504008-505031                  | A05_or337         | glyoxaldehyde-3-phosphate dehydrogenase(gapL); CLOFA                                                                                                                      |
| 411 | 505024-506253                  | A05_or409         | phosphoglycerate kinase (pgk); THEM8                                                                                                                                      |
| 412 | 506291-507253                  | A05_or320         | phosphonacetylase (paa); BACSU                                                                                                                                            |
| 413 | 508131-507259                  | A05_or290         | hypothetical protein (ytdA) homolog; ECOLI                                                                                                                                |
| 414 | 508316-511264                  | A05_or383         | P115 protein homolog (SOC1); MYCHR                                                                                                                                        |
| 415 | 511270-512316                  | A05_or348         | cell division protein (hly); ECOLI                                                                                                                                        |
| 416 | 512397-512605                  | A05_or102         | hypothetical 13.3 KD protein homolog (ytmE); BACSU                                                                                                                        |
| 417 | 513605-512994                  | A05_or129         | MG296 homolog, MYCGE                                                                                                                                                      |
| 418 | 513995-514107                  | A05_or370         | hypothetical protein (H0174); HAEBN                                                                                                                                       |
| 419 | 514238-515665                  | A05_or475         | MG294 homolog (pae. peroxide); MYCGE                                                                                                                                      |
| 420 | 515658-516383                  | A05_or241a        | glycero-phosphoryl transfer phosphotransferase (gtpC); BACSU                                                                                                              |
| 421 | 516435-519137                  | A05_or900         | alanine-tRNA synthetase (alaS); ECOLI                                                                                                                                     |
| 422 | 521188-519560                  | A05_or342         | transport system permease protein P99; MYCHR                                                                                                                              |
| 423 | 521915-521181                  | A05_or244         | ATP-binding protein P98; MYCHR                                                                                                                                            |
| 424 | 523050-521908                  | A05_or386V        | high affinity transport system protein P17; MYCHR                                                                                                                         |
| 425 | 524382-523301                  | A05_or493         | hypothetical 130K protein homolog (h66, P1 operon); MYCPN                                                                                                                 |
| 426 | 524892-525311                  | A05_or139         | -                                                                                                                                                                         |
|     | 525343-523309                  | REPMP5            | repetitive DNA sequence REPMP5                                                                                                                                            |
| 427 | 525388-526224                  | A05_or278         | ADP1_MYCPN adhesin P1 precursor homolog; MYCPN                                                                                                                            |
|     | 526357-525404                  | REPMP4            | repetitive DNA sequence REPMP4                                                                                                                                            |
| 428 | 526818-527576                  | A05_or252         | putative lipoprotein, MG440 homolog, MYCGE                                                                                                                                |
|     | 528050-527890                  | REPMP1            | repetitive DNA sequence REPMP1                                                                                                                                            |
| 429 | 528164-527718                  | F11_or148b        | -                                                                                                                                                                         |
|     | 528191-528045                  | REPMP1            | repetitive DNA sequence REPMP1                                                                                                                                            |
| 430 | 530128-528527                  | F11_or533L        | ADP1_MYCPN adhesin P1 precursor homolog; MYCPN                                                                                                                            |
|     | 530201-528684                  | REPMP2/3          | repetitive DNA sequence REPMP2/3                                                                                                                                          |
| 431 | 532483-530201                  | F11_or760         | putative lipoprotein, MG360 homolog, MYCGE                                                                                                                                |
| 432 | 532711-533330                  | F11_or879         | -                                                                                                                                                                         |
|     | 533464-533390                  | mpga              | Trp-tRNA (TGA) gene; MYCPN                                                                                                                                                |
| 433 | 533709-535435                  | F11_or84          | (acyl carrier protein, STRGA)                                                                                                                                             |
| 434 | 536337-535744                  | F11_or197         | MG286 homolog, MYCGE                                                                                                                                                      |
| 435 | 537384-536344                  | F11_or346         | MG283 homolog, MYCGE                                                                                                                                                      |
| 436 | 537733-537365                  | F11_or122a        | MG284 homolog, MYCGE                                                                                                                                                      |
| 437 | 539329-537878                  | F11_or483         | putative prolyl-tRNA synthetase (proS); YEAST                                                                                                                             |
| 438 | 539611-540093                  | F11_or160         | transcription elongation factor (groA); KCPH                                                                                                                              |
|     | 540123-540573                  | mpga              | Trp-tRNA (TAC), Glu-tRNA (CAA), Lys-tRNA (AAA), Leu-tRNA (TTA) Gly-tRNA (OGA) genes; MYCPN                                                                                |
| 439 | 540861-542609                  | F11_or382         | MG281 homolog, MYCGE                                                                                                                                                      |
| 440 | 542671-543534                  | F11_or287         | MG280 homolog, MYCGE                                                                                                                                                      |
| 441 | 543534-544190                  | F11_or218         | MG279 homolog, MYCGE                                                                                                                                                      |
| 442 | 546388-544187                  | F11_or733         | antigen response protein (spoT); ECOLI                                                                                                                                    |
| 443 | 546644-549307                  | F11_or887         | MG277 homolog, MYCGE                                                                                                                                                      |
| 444 | 549434-549875                  | F11_or133         | adenosine phosphoribosyltransferase (ap); HAEBN                                                                                                                           |
| 445 | 549943-551382                  | F11_or479         | NADH oxidase (nox); ENTFA                                                                                                                                                 |
| 446 | 551403-552479                  | F11_or358a        | pyruvate dehydrogenase E1-alpha subunit (pdhA); ACHLA                                                                                                                     |
| 447 | 552581-553484                  | F11_or327         | pyruvate dehydrogenase E1-beta subunit (pdhB); ACHLA                                                                                                                      |
| 448 | 553863-555911                  | F11_or402         | dihydroliponate acetyltransferase component (E2) (pdhC); ACHLA                                                                                                            |
| 449 | 555012-556385                  | F11_or457         | dihydroliponate dehydrogenase (pdhD); BACST                                                                                                                               |
| 450 | 556432-557431                  | F11_or339         | lipote protein ligase (lplA); ECOLI                                                                                                                                       |
| 451 | 557803-558879                  | F11_or358b        | MG269 homolog, MYCGE                                                                                                                                                      |
|     | 558904-558982                  | 4.5s RNA          | 4.5S RNA; MYCPN                                                                                                                                                           |
| 452 | 559027-559716                  | F11_or229         | hypothetical protein (yaaF) homolog; BACSU                                                                                                                                |
| 453 | 559771-560995                  | F11_or114         | MG267 homolog, MYCGE                                                                                                                                                      |
| 454 | 560096-562477                  | F11_or782b        | leucyl-tRNA synthetase (leuS); BACSU                                                                                                                                      |
| 455 | 562480-563328                  | A19_or382         | hypothetical protein (ytdA) homolog; ECOLI                                                                                                                                |
| 456 | 563860-563258                  | A19_or200         | hypothetical protein (H0396) homolog; HAEBN                                                                                                                               |
| 457 | 564752-563834                  | A19_or292         | hypothetical protein (yaaA) homolog; ECOLI                                                                                                                                |
| 458 | 565711-564878                  | A19_or277         | formamitopyrimidine-DNA glycoylase (fpg); BACFI                                                                                                                           |
| 459 | 566586-565711                  | A19_or291         | DNA polymerase I (polA, 5'-3' exonuclease) homolog; STRPN                                                                                                                 |
| 460 | 569238-566390                  | A19_or872         | DNA polymerase III alpha subunit (dnaII); HAEBN                                                                                                                           |
|     | 569534-566998                  | mpga              | Arg-tRNA gene (CGA); MYCPN                                                                                                                                                |
| 461 | 569663-573285                  | A19_or1140        | -                                                                                                                                                                         |
| 462 | 573664-574053                  | A19_or129         | -                                                                                                                                                                         |
| 463 | 574399-573688                  | A19_or239V        | -                                                                                                                                                                         |
| 464 | 576117-576731                  | A19_or204         | -                                                                                                                                                                         |
| 465 | 578517-576742                  | A19_or391         | -                                                                                                                                                                         |
| 466 | 578671-579306                  | A19_or211         | -                                                                                                                                                                         |
|     | 579725-578587                  | REPMP4            | repetitive DNA sequence REPMP4                                                                                                                                            |
|     | 581534-580008                  | REPMP2/3          | repetitive DNA sequence REPMP2/3                                                                                                                                          |
| 467 | 581562-579349                  | A19_or737V        | ADP1_MYCPN adhesin P1 precursor homolog; MYCPN                                                                                                                            |
| 468 | 582203-582964                  | H91_or253         | putative lipoprotein                                                                                                                                                      |
| 469 | 583638-583096                  | H91_or180         | -                                                                                                                                                                         |

Table 4. Continued

|     |                |             |                                                                                                                                        |
|-----|----------------|-------------|----------------------------------------------------------------------------------------------------------------------------------------|
|     | 583663..583592 | REPMP1      | repetitive DNA sequence REPMP1                                                                                                         |
| 470 | 583295..584327 | HS1_orf322  | hypothetical 136K protein homolog (orf5, P1 operon); MYCPN                                                                             |
| 471 | 586644..585226 | HS1_orf272  | hypothetical 136K protein homolog (orf5, P1 operon); MYCPN                                                                             |
|     | 586110..584114 | REPMP5      | repetitive DNA sequence REPMP5                                                                                                         |
| 472 | 586934..586128 | HS1_orf268  | type I restriction enzyme <i>eco</i> RI specificity protein (ha55) homolog; HAEBN                                                      |
| 473 | 589311..587278 | HS1_orf677  | MG260 homolog, MYCGE                                                                                                                   |
| 474 | 589638..589250 | HS1_orf302  | putative lipoprotein, MG260 homolog, MYCGE                                                                                             |
| 475 | 591151..589790 | HS1_orf453  | possible protoporphyrinogen oxidase (hemK); ECOLI                                                                                      |
| 476 | 592230..591151 | HS1_orf359V | peptide chain release factor I (RF1); pTA; BACSU                                                                                       |
| 477 | 592524..592231 | HS1_orf797  | ribosomal protein L31 (rplL31); ECOLI                                                                                                  |
| 478 | 593345..592569 | HS1_orf258  | MG256 homolog, MYCGE                                                                                                                   |
|     | 593426..593353 | mqk8        | Trp-tRNA(TGG) gene; MYCPN                                                                                                              |
| 479 | 593779..593575 | HS1_orf334  | MG255 homolog, MYCGE                                                                                                                   |
|     | 595211..595283 | mqk8        | Gly-tRNA(GGC) gene; MYCPN                                                                                                              |
| 480 | 595347..595323 | HS1_orf858  | DNA ligase (lig); ECOLI                                                                                                                |
| 481 | 597304..596617 | HS1_orf407  | cystinyl-tRNA synthetase (cysS); BACSU                                                                                                 |
| 482 | 598620..599348 | HS1_orf242a | hypothetical protein (yacD) (tRNA methylase) homolog; BACSU                                                                            |
| 483 | 599370..600719 | HS1_orf449  | glycyl-tRNA synthetase (gyl1); YEAST                                                                                                   |
| 484 | 600703..602565 | HS1_orf820  | DNA primase (dnaG); BACSU                                                                                                              |
| 485 | 602618..604117 | HS1_orf499  | RNA polymerase sigma-A factor (sigA); BACSU                                                                                            |
| 486 | 604391..604742 | HS1_orf213  | MG248 homolog, MYCGE                                                                                                                   |
| 487 | 604748..605467 | HS1_orf239  | hypothetical protein (ygiH) homolog; ECOLI                                                                                             |
| 488 | 606304..605459 | HS1_orf281  | MG246 homolog, MYCGE                                                                                                                   |
| 489 | 606788..606294 | HS1_orf164  | 5-formyl tetrahydrofolate cyclo-ligase (HfbS); HAEBN                                                                                   |
| 490 | 608873..607743 | HS1_orf376  | Type I restriction enzyme (ha5R) homolog; ECOLI                                                                                        |
| 491 | 609427..609080 | HS1_orf115  | -                                                                                                                                      |
| 492 | 610177..609557 | HS1_orf206  | Type I restriction enzyme (ha5R) homolog; ECOLI                                                                                        |
| 493 | 611772..611122 | HS1_orf216  | -                                                                                                                                      |
| 494 | 612987..611995 | HS1_orf330  | type I restriction enzyme <i>eco</i> RI specificity protein (ha5S) homolog; HAEBN                                                      |
| 495 | 614997..613366 | HS1_orf543  | type I restriction enzyme (ha5I); ECOLI                                                                                                |
| 496 | 617385..615138 | HS1_orf715  | DNA helicase II (ha5II); HAEBN                                                                                                         |
| 497 | 618937..617348 | HS1_orf529  | DNA helicase (pcaA) homolog; STAAU                                                                                                     |
| 498 | 619615..618941 | HS1_orf224  | MG243 homolog, MYCGE                                                                                                                   |
| 499 | 621513..619615 | F10_orf632a | MG242 homolog, MYCGE                                                                                                                   |
| 500 | 623381..621516 | F10_orf621  | MG241 homolog, MYCGE                                                                                                                   |
| 501 | 623625..624500 | F10_orf291  | MG240 homolog, MYCGE                                                                                                                   |
| 502 | 626726..624501 | F10_orf341  | -                                                                                                                                      |
| 503 | 627693..626713 | F10_orf326  | protein (DcrA) homolog; BACLJ                                                                                                          |
| 504 | 629548..627696 | F10_orf350  | putative ABC transport permease                                                                                                        |
| 505 | 632530..630143 | F10_orf795  | ATP-dependent protease (hae); BACSU                                                                                                    |
| 506 | 632925..633601 | F10_orf444  | trigger factor (tgi); HAEBN                                                                                                            |
| 507 | 634844..633960 | F10_orf294  | MG237 homolog, MYCGE                                                                                                                   |
| 508 | 635330..634834 | F10_orf158  | MG236 homolog, MYCGE                                                                                                                   |
| 509 | 636124..635264 | F10_orf286  | ribonuclease IV (rfi); ECOLI                                                                                                           |
| 510 | 636431..636117 | F10_orf304  | ribosomal protein L27 (rplL27); BACSU                                                                                                  |
| 511 | 636726..636424 | F10_orf303a | hypothetical protein (yaaB) homolog; BACSU                                                                                             |
| 512 | 637001..636719 | F10_orf303b | ribosomal protein L21 (rplL21); BACSU                                                                                                  |
| 513 | 639333..637968 | F10_orf721  | ribonucleoside-diphosphate reductase (rdpE); SALTY                                                                                     |
| 514 | 639918..639357 | F10_orf153  | MG230 homolog, MYCGE                                                                                                                   |
| 515 | 640840..639821 | F10_orf339  | ribonucleoside reductase 2 (rdpF); SALTY                                                                                               |
| 516 | 641329..640847 | F10_orf160  | dihydrofolate reductase (DHFR 1.5.1.3)(dhfr1); LACLA                                                                                   |
| 517 | 642317..641331 | F10_orf328  | thymidylate synthase (thyA); STAAU                                                                                                     |
| 518 | 644200..643689 | F10_orf503  | general amino acid permease GAPI homolog; YEAST                                                                                        |
| 519 | 645650..644735 | F10_orf491  | hypothetical protein (gi: 710648) homolog (put. amino acid permease); CLOPE                                                            |
| 520 | 646835..645693 | F10_orf280  | cell division protein (haC); BACSU                                                                                                     |
| 521 | 648100..646841 | F10_orf419  | MG225 homolog, MYCGE                                                                                                                   |
| 522 | 649029..648303 | F10_orf268  | hypothetical protein (yaaC) homolog; ECOLI                                                                                             |
| 523 | 649444..649019 | F10_orf141b | hypothetical protein (yaaB) homolog; ECOLI                                                                                             |
|     | 649773..649699 | mqk9        | Arg-tRNA gene (CGC); MYCPN                                                                                                             |
| 524 | 649845..650117 | F10_orf50   | MG220 homolog, MYCGE                                                                                                                   |
| 525 | 650826..650200 | F10_orf218  | -                                                                                                                                      |
| 526 | 651919..650846 | F10_orf357  | -                                                                                                                                      |
| 527 | 652990..651934 | F10_orf183B | -                                                                                                                                      |
| 528 | 653627..652439 | F10_orf465  | cytadherase accessory protein (haa2); MYCPN                                                                                            |
| 529 | 660458..658761 | F10_orf565  | protein P65; MYCPN                                                                                                                     |
| 530 | 661390..660461 | F10_orf309  | -                                                                                                                                      |
| 531 | 662214..661393 | H10_orf273a | carbamate kinase (EC 2.7.2.2) (arcC); PSEAE                                                                                            |
| 532 | 663058..662462 | H10_orf198  | ornithine carbamoyl transferase (oc1); ECOLI                                                                                           |
| 533 | 663675..662959 | H10_orf238  | arginine deiminase (arcA); MYCCA                                                                                                       |
|     | 664617..663872 | mqg3        | Cys-tRNA(TGC), Pro-tRNA(CCA), Met-tRNA(ATG), Ile-tRNA(ATC), Ser-tRNA(TCA) (Met-tRNA(ATG), Asp-tRNA(GAC) and Phe-tRNA(TTC) genes; MYCPN |
| 534 | 666181..664655 | H10_orf508  | pyruvate kinase (pyk); LACLA                                                                                                           |
| 535 | 667173..666187 | H10_orf528  | 6-phosphofruktokinase (pfk); ECOLI                                                                                                     |
| 536 | 667819..667193 | H10_orf208  | hypothetical protein (P35155) homolog; BACSU                                                                                           |
| 537 | 669323..667800 | H10_orf506  | dihydrofolate reductase (dhr) homolog protein; BINTC                                                                                   |
| 538 | 670124..669324 | H10_orf266  | 1-acyl-sn-glycerol-3-phosphate acyltransferase (gpb); YEAST                                                                            |
| 539 | 670471..670112 | H10_orf119  | -                                                                                                                                      |
| 540 | 670923..670474 | H10_orf149  | MG211 homolog, MYCGE                                                                                                                   |
| 541 | 671792..671130 | H10_orf220L | -                                                                                                                                      |
| 542 | 672461..671841 | H10_orf206  | -                                                                                                                                      |
| 543 | 672500..673054 | H10_orf184  | prolipoprotein signal peptidase (pp1); STACA                                                                                           |
| 544 | 673854..673903 | H10_orf309  | hypothetical protein (yocC) homolog; ECOLI                                                                                             |
| 545 | 673967..674557 | H10_orf196  | MG208 homolog, MYCGE                                                                                                                   |
| 546 | 674987..674550 | H10_orf145L | type I restriction enzyme <i>eco</i> RI specificity protein (ha5S) homolog; HAEBN                                                      |
| 547 | 675689..675126 | H10_orf187V | Had5B protein homolog; MYCPN                                                                                                           |
| 548 | 678142..675779 | A65_orf787a | putative lipoprotein, MG260 homolog, MYCGE                                                                                             |
| 549 | 679094..678738 | A65_orf118  | -                                                                                                                                      |
|     | 680988..679726 | REPMP23     | repetitive DNA sequence REPMP23                                                                                                        |
| 550 | 681322..679625 | A65_orf465V | adhesin P1 (group 2) homolog; MYCPN                                                                                                    |
| 551 | 682245..681325 | A65_orf396  | protein (pbf) homolog; ECOLI                                                                                                           |
| 552 | 683088..682704 | A65_orf794  | putative lipoprotein, MG260 homolog, MYCGE                                                                                             |
|     | 686360..686126 | REPMP1      | repetitive DNA sequence REPMP1                                                                                                         |
| 553 | 686379..686032 | A65_orf115  | -                                                                                                                                      |
| 554 | 688090..687590 | A65_orf166  | MG260 homolog, MYCGE                                                                                                                   |
| 555 | 689578..688445 | A65_orf377  | MG260 homolog, MYCGE                                                                                                                   |
| 556 | 691498..689789 | A65_orf569  | MG139 homolog, MYCGE                                                                                                                   |
| 557 | 693374..691629 | A65_orf581  | GTP-binding membrane protein (gtpA); HAEBN                                                                                             |
| 558 | 694573..693374 | A65_orf399V | Yell protein homolog; ECOLI                                                                                                            |
| 559 | 696002..694533 | A65_orf489  | 1-tryl-tRNA synthetase (tryS); BACSU                                                                                                   |
| 560 | 696047..696004 | A65_orf285  | MG135 homolog, MYCGE                                                                                                                   |
| 561 | 697178..696876 | A65_orf100  | hypothetical protein (yaaK) homolog; BACSU                                                                                             |
| 562 | 697200..698000 | A65_orf266  | MG133 homolog, MYCGE                                                                                                                   |
| 563 | 697969..698483 | A65_orf144  | hypothetical protein (hif1) homolog; YEAST                                                                                             |
| 564 | 701122..700367 | A65_orf231a | putative lipoprotein, MG440 homolog, MYCGE                                                                                             |

Table 4. Continued

|     |                |                 |                                                                                  |
|-----|----------------|-----------------|----------------------------------------------------------------------------------|
| 565 | 703155..701674 | A65_orf493      | hypothetical protein (yar1) homolog; MYCMY                                       |
| 566 | 703498..703145 | A65_orf117      | MG129 homolog; MYCGE                                                             |
| 567 | 704277..703498 | A65_orf259      | hypothetical protein (HI0072) homolog; HAEIN                                     |
| 568 | 704714..704277 | A65_orf145      | hypothetical protein (ygl1) homolog; STRVR                                       |
| 569 | 704771..705811 | A65_orf346      | tryptophanyl-tRNA synthetase (tryS); HAEIN                                       |
| 570 | 706664..705819 | A65_orf281      | hypothetical protein (gi: 973220) homolog; ECOLI                                 |
| 571 | 706984..706676 | A65_orf102      | thioredoxin (trx); YEAST                                                         |
| 572 | 708477..707050 | A65_orf475      | MG123 homolog; MYCGE                                                             |
| 573 | 710602..708467 | A65_orf711      | DNA topoisomerase I (topA); BACSU                                                |
| 574 | 711574..710639 | A65_orf311      | high affinity ribose transport protein (rbtC); HAEIN                             |
| 575 | 713127..711574 | A65_orf517      | MG120 homolog; MYCGE                                                             |
| 576 | 714862..713144 | A65_orf572      | hypothetical ABC transporter (yjcW) homolog; ECOLI                               |
| 577 | 715893..714877 | A65_orf338      | UDP-glucose 4-epimerase (galE); STRTR                                            |
| 578 | 716545..715874 | A65_orf223      | MG117 homolog; MYCGE                                                             |
| 579 | 717293..716538 | A65_orf251b     | MG116 homolog; MYCGE                                                             |
| 580 | 718497..717814 | A65_orf227      | phosphatidylglycerophosphate synthase (pgsA); HAEIN                              |
| 581 | 719821..718454 | K04_orf455o     | asparaginyl-tRNA synthetase (asnS); ECOLI                                        |
| 582 | 720475..719828 | K04_orf215L     | D-ribulose-5-phosphate 3 epimerase (rfaE); ALCEU                                 |
| 583 | 721745..720453 | K04_orf430      | phosphoglucose isomerase B (pgiB); BACST                                         |
| 584 | 722603..721767 | K04_orf278L     | hypothetical protein (yjcQ) homolog; ECOLI                                       |
| 585 | 723759..722590 | K04_orf389      | probable protein serine/threonine kinase (YFKT3); CAEEL                          |
| 586 | 724529..723750 | K04_orf259      | protein phosphatase 2C homolog (ppc1); YEAST                                     |
| 588 | 725070..723720 | K04_orf216      | polypeptide deformylase (def); HAEIN                                             |
| 587 | 725248..724529 | K04_orf239      | 5'guanylate kinase (gmk); HAEIN                                                  |
| 589 | 726297..725689 | K04_orf202      | MG105 homolog; MYCGE                                                             |
| 590 | 728477..726297 | K04_orf726      | virulence associated protein homolog (vacB); HAEIN                               |
| 591 | 729593..728751 | K04_orf280      | MG103 homolog; MYCGE                                                             |
| 592 | 730530..729583 | K04_orf315      | thioredoxin reductase (trxB); EUBAC                                              |
| 593 | 731191..730523 | K04_orf222      | MG101 homolog; MYCGE                                                             |
| 594 | 732602..731166 | G07_orf478a     | protein (pet112) homolog; YEAST                                                  |
| 595 | 734028..732592 | G07_orf478V     | amidase homolog (S47454); YEAST                                                  |
| 596 | 735470..734031 | G07_orf479      | MG098 homolog; MYCGE                                                             |
| 597 | 736390..735668 | G07_orf240      | uracil DNA glycosylase (ung); ECOLI                                              |
| 598 | 737668..736415 | G07_orf417      | MG288 homolog; MYCGE                                                             |
| 599 | 739760..738396 | G07_orf454      | putative lipoprotein; MG095 homolog; MYCGE                                       |
| 600 | 741185..739764 | G07_orf473      | replicative DNA helicase (dnaC); BACSU                                           |
| 601 | 741621..741172 | G07_orf149      | ribosomal protein L9 (rpl9); BACST                                               |
| 602 | 741938..741624 | G07_orf104b     | ribosomal protein S18 (rps18); ECOLI                                             |
| 603 | 742428..741938 | G07_orf166      | single-stranded DNA binding protein (ssb); HAEIN                                 |
| 604 | 743075..742428 | G07_orf215      | ribosomal protein S6 (rps6); ECOLI                                               |
| 605 | 745198..743132 | G07_orf688      | elongation factor G (fus); THEAQ                                                 |
| 606 | 745688..745221 | G07_orf155      | ribosomal protein S7 (rps7); BACST                                               |
| 607 | 746161..745742 | G07_orf139      | ribosomal protein S12 (rps12); BACST                                             |
| 608 | 747359..746190 | G07_orf389b     | prolipoprotein diacylglycerol transferase (igt); ECOLI                           |
| 609 | 748287..747349 | G07_orf312      | MG085 homolog; MYCGE                                                             |
| 610 | 749157..748288 | G07_orf289      | hypothetical protein (yaeA) homolog; BACSU                                       |
| 611 | 749716..749150 | G07_orf188      | peptidyl-tRNA hydrolase homolog (ph); HAEIN                                      |
| 612 | 750096..749716 | G07_orf226      | ribosomal protein L1 (rpl1); BACST                                               |
| 613 | 750809..750396 | G07_orf137      | ribosomal protein L11 (rpl11); THEMMA                                            |
| 614 | 753420..750865 | G07_orf851      | oligopeptide transport ATP-binding protein (oppF); BACSU                         |
| 615 | 754654..753383 | G07_orf423      | oligopeptide transport ATP-binding protein (oppD); BACSU                         |
| 616 | 755786..754656 | G07_orf376      | oligopeptide transport system permease protein (amtD); STRPN                     |
| 617 | 756948..755779 | G07_orf389a     | oligopeptide transport system permease protein (oppB); BACSU                     |
| 618 | 757224..757640 | G07_orf138      | MG076 homolog; MYCGE                                                             |
| 619 | 760729..757637 | G07_orf1030     | protein P100; MYCPN                                                              |
| 620 | 761241..760834 | G07_orf135      | MG074 homolog; MYCGE                                                             |
| 621 | 763217..761244 | G07_orf657      | excinuclease ABC subunit B (uvrB); ECOLI                                         |
| 622 | 765618..763192 | G07_orf808      | preprotein translocase (secA); BACSU                                             |
| 623 | 768223..765605 | G07_orf872V     | MG(2+) transport ATPase, P-typ 1 (mgtA); ECOLI                                   |
| 624 | 769100..768216 | G07_orf294      | ribosomal protein S2 (rps2); SPIPL                                               |
| 625 | 772532..769110 | GT9_orf940o     | PTS system, glucose-specific IIABC component (EIIABC-GLC); BACSU                 |
| 626 | 772584..772925 | GT9_orf113      | -                                                                                |
| 627 | 774296..772980 | GT9_orf438V     | ADP1_MYCPN adhesin P1 precursor homolog; MYCPN                                   |
| 628 | 774345..773095 | REPMP4          | repetitive DNA sequence REPMP4                                                   |
| 629 | 775203..774757 | GT9_orf148      | MG260 homolog; MYCGE                                                             |
| 630 | 775230..774929 | REPMP1          | repetitive DNA sequence REPMP1                                                   |
| 631 | 775949..775566 | GT9_orf127      | ADP1_MYCPN adhesin P1 precursor homolog; MYCPN                                   |
| 632 | 776809..775868 | GT9_orf313      | ADP1_MYCPN adhesin P1 precursor homolog; MYCPN                                   |
| 633 | 777250..775724 | REPMP2/3        | repetitive DNA sequence REPMP2/3                                                 |
| 634 | 778005..777289 | GT9_orf238      | type I restriction enzyme <i>ecolI</i> specificity protein (hdsS) homolog; HAEIN |
| 635 | 780875..778479 | GT9_orf798      | putative lipoprotein; MG260 homolog; MYCGE                                       |
| 636 | 783441..781159 | GT9_orf760      | putative lipoprotein; MG185 homolog; MYCGE                                       |
| 637 | 784494..783535 | GT9_orf319V     | adenine-specific methyltransferase EcoRI (mce1); ECOLI                           |
| 638 | 786329..784494 | GT9_orf611      | oligoendopeptidase F (pepF); LACLA                                               |
| 639 | 787053..786322 | GT9_orf243V     | pseudouridylyl synthase I (hisT); ECOLI                                          |
| 640 | 788350..787046 | GT9_orf434      | MG181 homolog; MYCGE                                                             |
| 641 | 789254..788343 | GT9_orf303      | histidine transport ATP-binding protein (hisP); ECOLI                            |
| 642 | 790066..789242 | GT9_orf274      | sulfate transport ATP-binding protein (cysA); SYNPN                              |
| 643 | 790424..790050 | GT9_orf124a     | ribosomal protein L17 (rpl17); BACSU                                             |
| 644 | 791410..790427 | GT9_orf327      | RNA polymerase alpha core subunit (rpoA); BACSU                                  |
| 645 | 791781..791416 | GT9_orf121      | ribosomal protein S11 (rps11); BACST                                             |
| 646 | 792155..791781 | GT9_orf124b     | ribosomal protein S13 (rps13); BACSU                                             |
| 647 | 792268..792155 | GT9_orf37       | ribosomal protein L36 (rpl36); CHLTR                                             |
| 648 | 792515..792279 | GT9_orf78       | initiation factor I (infA); BACSU                                                |
| 649 | 793261..792515 | GT9_orf248      | methionine amino peptidase (map); BACSU                                          |
| 650 | 793908..793261 | GT9_orf215      | adenylate kinase (ack); BACST                                                    |
| 651 | 795335..793908 | GT9_orf477      | preprotein translocase subunit (secY); MYCCA                                     |
| 652 | 795790..795335 | GT9_orf151      | ribosomal protein L15 (rpl15); MYCCA                                             |
| 653 | 796453..795794 | GT9_orf219      | ribosomal protein S5 (rps5); BACSU                                               |
| 654 | 796807..796457 | GT9_orf116b     | ribosomal protein L18 (rpl18); BACST                                             |
| 655 | 797362..796808 | GT9_orf184      | ribosomal protein L6 (rpl6); MYCCA                                               |
| 656 | 797797..797369 | GT9_orf142      | ribosomal protein S8 (rps8); MYCCA                                               |
| 657 | 797976..797791 | GT9_orf61       | ribosomal protein S14 (rps14); MYCCA                                             |
| 658 | 798520..797978 | GT9_orf180b     | ribosomal protein L5 (rpl5); HAEIN                                               |
| 659 | 798858..798523 | GT9_orf111a     | ribosomal protein L24 (rpl24); BACST                                             |
| 660 | 799226..798858 | GT9_orf122      | ribosomal protein L14 (rpl14); BACST                                             |
| 661 | 799487..799230 | GT9_orf85       | ribosomal protein S17 (rps17); MYCCA                                             |
| 662 | 799822..799487 | GT9_orf111b     | ribosomal protein L29 (rpl29); THEMMA                                            |
| 663 | 800241..799822 | VXpSPT7_orf139o | ribosomal protein L16 (rpl16); MYCCA                                             |
| 664 | 801062..800241 | VXpSPT7_orf273  | ribosomal protein S3 (rps3); MYCCA                                               |
| 665 | 801618..801064 | VXpSPT7_orf184  | ribosomal protein L22 (rpl22); HAEIN                                             |
| 666 | 801808..801545 | VXpSPT7_orf287  | ribosomal protein S19 (rps19); MYCBO                                             |
| 667 | 802671..801808 | VXpSPT7_orf287a | ribosomal protein L2 (rpl2); MYCCA                                               |
| 668 | 803384..802671 | VXpSPT7_orf237  | ribosomal protein L23 (rpl23); THEMMA                                            |

Table 4. Continued

|     |                |                 |                                                    |
|-----|----------------|-----------------|----------------------------------------------------|
| 666 | 804025..803387 | VXpSPT7_orf212  | ribosomal protein L4 (rpl.4); MYCCA                |
| 667 | 804888..804025 | VXpSPT7_orf287b | ribosomal protein L3 (rpl.3); MYCCA                |
| 668 | 805228..804902 | VXpSPT7_orf108  | ribosomal protein S10 (rps10); THEMA               |
| 669 | 805660..805322 | VXpSPT7_orf112  |                                                    |
| 670 | 806869..805907 | VXpSPT7_orf320  | putative lipoprotein, MG149 homolog; MYCGE         |
| 671 | 808328..806991 | VXpSPT7_orf445  | MG148 homolog; MYCGE                               |
| 672 | 809615..808482 | VXpSPT7_orf377  | MG147 homolog; MYCGE                               |
| 673 | 810876..809602 | VXpSPT7_orf424  | hemolysin (hlyC) homolog protein; HAEIN            |
| 674 | 811711..810902 | VXpSPT7_orf269  | hypothetical protein (yaaC) homolog; PSEFL         |
| 675 | 812932..811724 | VXpSPT7_orf402  | MG144 homolog; MYCGE                               |
| 676 | 813298..812948 | VXpSPT7_orf116  | ribosome binding factor A homolog (rbfA); EC'OL1   |
| 677 | 815154..813301 | VXpSPT7_orf617  | protein synthesis inhibitor factor 2 (infB); BACST |

noteworthy: the lack of the ribosomal protein S1, of the peptide chain release factor 2 (RF2) and of the glutamyl-tRNA synthetase. So far, quite a number of Gram-positive bacteria including *Bacillus* or *Lactobacillus* species also lack the S1 protein and the glutamyl-tRNA synthetase (46).

One of the functions of the S1 protein is to bind the mRNA to the 30S small ribosomal subunit. Therefore, it was argued that ribosomal binding sites in front of many genes (47) of *B.subtilis* compensate for the missing S1 protein. The Shine–Dalgarno sequences are so well conserved, that they could be used routinely as a good indicator for proposing ORFs in the *B.subtilis* genome sequencing projects, but this does not apply to *M.pneumoniae*. The Shine–Dalgarno sequence is in many instances not well conserved or missing altogether, even in genes for which we know the translational initiation sites from independent studies.

Of the 20 standard tRNA-synthetases, the glutamyl-tRNA synthetase is the only one not detected in *M.pneumoniae*. Studies on tRNA synthetases in Gram-positive bacteria have indicated that this enzyme is dispensable. *Bacillus subtilis* solves this problem by charging the tRNA<sup>Gln</sup> first with glutamate which is subsequently converted to glutamine by an amido transferase. The glutamyl tRNA synthetase aminoacylates both tRNA<sup>Glu</sup> and tRNA<sup>Gln</sup>. The corresponding amido transferase has not yet been identified in *M.pneumoniae*, therefore it is still an open question as to how glutamine is bound to its tRNA.

Finally, the modified codon usage by *M.pneumoniae*, reading UGA as tryptophan instead of a stop codon, requires the absence of the peptide chain release factor 2 (RF2) and the presence of the release factor 1 (RF1). The latter recognizes the stop codons UAG and UAA and RF2 the stop codons UGA and UAA. Since the UGA codon is frequently located within a gene it is essential to exclude RF2 to prevent the premature termination of proteins.

### Surface structure, cytodherence-associated proteins and cell division

This category comprises the adhesins and the cytodherence associated proteins, including the components of the cytoskeleton-like structure, the function of which is probably to stabilize and maintain the shape of the wall-less mycoplasma, to direct proteins to certain regions in the membrane and to keep them in these positions (2). Adherence to the receptor(s) of the host cell depends on the tip structure. The correct assembly of the adhesin P1 (E07\_orf1627) and the 30 kDa adhesin-related protein on the tip structure (H08\_orf274) is necessary for attachment. The tip structure is an interesting example for bacterial cellular asymmetry (48).

The cytodherence-associated proteins were originally defined by hemadsorption-negative mutants which had lost certain proteins like the so called high molecular weight proteins HMW1, HMW2 and HMW3, the adhesin P1 and the proteins named A, B and C (2,28). B and C are most probably the gene products of

the ORF6 gene of the P1 operon (40 kDa protein = C, 90 kDa protein = B). The gene for A is still unknown. Another criterion for a putative protein of the cytoskeleton-like structure is its partitioning into the Triton X-100 insoluble fraction after treating *M.pneumoniae* with this detergent. This fraction is ill defined and comprises ~50 proteins, of which only a subfraction is associated with the cytoskeleton and/or cytodherence. The following proteins have been identified as most likely components of a cytoskeleton (2): HMW1 (H08\_orf1018), HMW2 (F10\_orf1818; Krause, submitted), HMW3 (H08\_orf672), P200 (D02\_orf10360) (49), P65 (F10\_orf405) (27). These proteins, with the exception of HMW2, share some common peculiar features, like an extended acidic proline rich domain and an abnormal migration in SDS-PAGE (49). The adhesin P1 is mainly distributed in the membrane fraction and to a lesser extent in the Triton X-100 insoluble fraction (50).

A large number of proposed ORFs contain sequences with high similarities to subregions of either the P1 protein or the ORF6 gene product of the P1 operon. The coding DNA sequences correspond to the repetitive DNA sequences RepMP2/3 (P1), RepMP4 (P1) and RepMP5 (ORF6). Preliminary experiments indicate that the proposed ORFs are not expressed under standard laboratory conditions. It has been observed that another independent isolate of *M.pneumoniae*, the strain FH, carries a different copy of RepMP2/3, RepMP4 and RepMP5 in its P1 operon than the *M.pneumoniae* strain M129 which is the subject of this paper (51,52). All experimental data so far show that only the repetitive sequences which are part of the P1 operon are expressed. The exchange of these copies presumably takes place by gene conversion as was indicated by DNA sequence analysis of the corresponding RepMP5 sequences in *M.pneumoniae* strains M129 and FH. Different is the situation with RepMP1, copies of which seem to be part of several expressed proteins. RepMP1-specific antibodies recognize several proteins on western blots of *M.pneumoniae* protein extracts (26).

Only little is known about cell division in *M.pneumoniae*. The lack of mutants, especially of conditional mutants, has prevented a detailed analysis. So far, the two proteins FtsZ and FtsH are classified as cell division proteins in analogy to their function in other bacteria (53). Other genes involved in chromosome partitioning or septum formation have not been identified in *M.pneumoniae*. Interesting problems to study might include the possible interaction of FtsZ with components of the cytoskeleton-like structure, which seems to play a key role in cell division, or the effects of cellular asymmetry on cell division and the formation of daughter cells. Other genes known to be involved in cell division in *E.coli*, the muk and min genes or additional fts genes were not found in *M.pneumoniae* (53).

### Lipoproteins

Altogether 46 proteins were identified as lipoproteins based on the following characteristic lipoprotein-specific features (54): (i) one or more basic amino acids among the first 5–7 amino acids of the N-terminus, (ii) a hydrophobic signal peptide and (iii) a cysteine residue immediately downstream of the signal peptide, which is available for modification by the transfer of the diacylglycerol moiety from glycerophospholipid to its sulfhydryl group. The precursor prolipoprotein with the modified cysteine is subsequently cleaved in *M.pneumoniae* by a specific signal peptidase (signal peptidase II). The modified cysteine will then be the first amino



acid of the processed protein. The cleavage site including the cysteine and the three (positions -3, -2 and -1) upstream located amino acids, is to some extent conserved (-3: 37×L, 6×F, 1×A, 1×V; -2: 19×S, 10×A, 8×T, 6×V, 2×I; -1: 37×A, 7×S, 1×G).

The number of lipoproteins in *M.pneumoniae* is relatively high compared with the Gram-negative bacteria *E.coli* and *H.influenzae*. Even in the closely related *M.genitalium* only 21 putative lipoproteins could be found by analyses of the published data (9).

The lipoproteins of *M.pneumoniae* can be divided into six subgroups based on sequence similarities; also included in these groups are proteins with similarities to lipoproteins but without the lipobox signature at the N-terminal end. Quite a number of these proposed genes with high similarities are organized in tandem. For instance seven lipoproteins and one protein without the lipobox but with otherwise extended similarities are located between genome positions 249 627 and 256 463 (cosmid pcosMPE09). A gene family, with 13 proposed ORFs including five lipoproteins, is located between 306 862 and 320 524 (cosmid pcosMPD02). Presently it is unclear whether all of the proposed genes are expressed.

*In vivo* labelling of *M.pneumoniae* with <sup>14</sup>C-labelled palmitic acid and protein analysis by SDS-PAGE reveal, instead of the expected 46 lipoproteins, only between 20 and 25 lipoproteins (Pyrowolakis, unpublished data). This discrepancy could be explained either by a regulated expression which only allows some of the several tandemly organized lipoproteins to be synthesized or that the labelling with palmitic acid was not sensitive enough or that some lipoproteins carry fatty acids other than palmitic acid. Only four of all the proposed lipoproteins show significant similarities to other bacterial genes beside the ones from *M.genitalium*. These include A05\_orf380V [high affinity transport system P37 with unknown specificity from *Mycoplasma hyorhinis* (55)], D09\_orf384 (aerobic glycerol-3-phosphate dehydrogenase, glpD), H03\_orf213 (uridine kinase) and D02\_orf207 (ATP synthase b subunit (atpF)).

The processing of the prolipoprotein to the mature lipoprotein in *E.coli* requires the three enzymes prolipoprotein diacylglycerol transferase, prolipoprotein signal peptidase and apolipoprotein transacylase. We find in *M.pneumoniae* only the transferase which catalyzes the thioether linkage between the diacylglycerol and the cysteine and the peptidase which cleaves in front of the cysteine following the signal peptide. The transacylase could not be identified either in *M.pneumoniae* nor in *M.genitalium* (9). Therefore it is still an open question if a third fatty acid is linked to the cysteine by an amide bond as has been found for lipoproteins of *E.coli*.

The absence of a periplasmic space provides reasons for the existence of a large number of lipoproteins. For surface-exposed proteins which have to function on the outside, anchoring them via long chain fatty acids at the *M.pneumoniae* cell membrane is an efficient way. Already known examples are substrate-binding proteins of transport systems or proteins possibly involved in antigenic variation for evasion of the immune system of the host, as has been shown for other mycoplasmas (56). Nothing is known about the fate of the cleaved signal peptides, as to whether they are degraded or recycled.

## Transport systems

In light of the scarcity of metabolic pathways and the marked dependence on exogenous nutrients (Table 1, Fig. 5), we expected *M.pneumoniae* to code for many transport systems to compensate

for its inability to synthesize essential compounds like amino acids. Three different transport systems, mainly involved in import, were found in *M.pneumoniae*: (i) the ABC transporter system (57) consisting of two ATP-binding, two membrane-spanning and one substrate-binding domain which are frequently present on separate polypeptides, but sometimes also consist of two or three different domains located on the same peptide (D12\_orf634 or D12\_orf623), (ii) the phosphoenolpyruvate: carbohydrate phosphotransferase system (PTS), (58) and (iii) facilitated diffusion systems with transmembrane proteins functioning as specific carriers. *Mycoplasma pneumoniae* codes for 43 genes involved in the above mentioned transport systems according to the present status of annotation. In addition, there are several proposed proteins with 6 or 12 transmembrane segments which are candidates for membrane-spanning domains of transport systems. The relatively low number of proteins listed in Table 1 indicates that at least some of the systems might not be very substrate specific, e.g. the transport systems for amino acids. Transport systems for histidine, glutamine, an ORF showing significant similarity to a probable aromatic amino acid permease from yeast and an ABC transport system for oligopeptides were identified based on similarity of the ATP-binding domains of ABC transporters.

Surprisingly, we could not identify a transport system for the precursors for RNA and DNA synthesis, namely adenine, guanine, uracil and thymine which are essential components of mycoplasma growth media.

In this context one has to be aware of the ambiguity in the identification of ABC transport proteins on the basis of sequence similarity of the ATP-binding proteins with respect to the predicted substrate to be transported, since database searches indicate numerous candidates with different specificities but with very similar, high score values. All the annotations in this paper were done on the basis of the highest score values. Therefore it might be possible that the predicted specificity disagrees with the *in vivo* activity in *M.pneumoniae*. Additional information from similarities to transmembrane domains or the substrate-binding proteins is only rarely at hand, since, in general, similarities among these domains are not well conserved. Even in positive examples, the score values are relatively low. Sometimes additional circumstantial evidence is derived from an operon-like organisation of the genes coding for ABC transporters, e.g. the unspecified ABC transporter consisting of the proteins P69, P29 and P37 from nucleotide 519 560 to 523 050 (A05\_orf542, A05\_orf244 and A05\_orf380V). A05\_orf542 could act as the membrane-spanning domain, A05\_orf244 as the ATP-binding domain and A05\_orf380V, as a putative lipoprotein which could function as a substrate-binding protein. These proteins were also identified by their significant similarity to the corresponding genes in *M.hyorhinis* (55).

In *M.pneumoniae* the ABC transport system for oligopeptides consists of two different transmembrane [G07\_orf376 = amiD (= oppC in *B.subtilis*); G07\_orf389a = oppB] and ATP-binding domains (G07\_orf851 = oppF, G07\_orf423 = oppD). It is also organized in an operon-like arrangement from nucleotide 750 865 to 756 948. In striking contrast to *B.subtilis*, the substrate-binding domain (oppA) is absent in *M.pneumoniae*. Since an oppA homolog is also absent in *M.genitalium* a sequencing or annotation error seems unlikely. It remains to be experimentally determined whether the substrate-binding protein is dispensable or is part of one of the transmembrane or ATP-binding proteins.

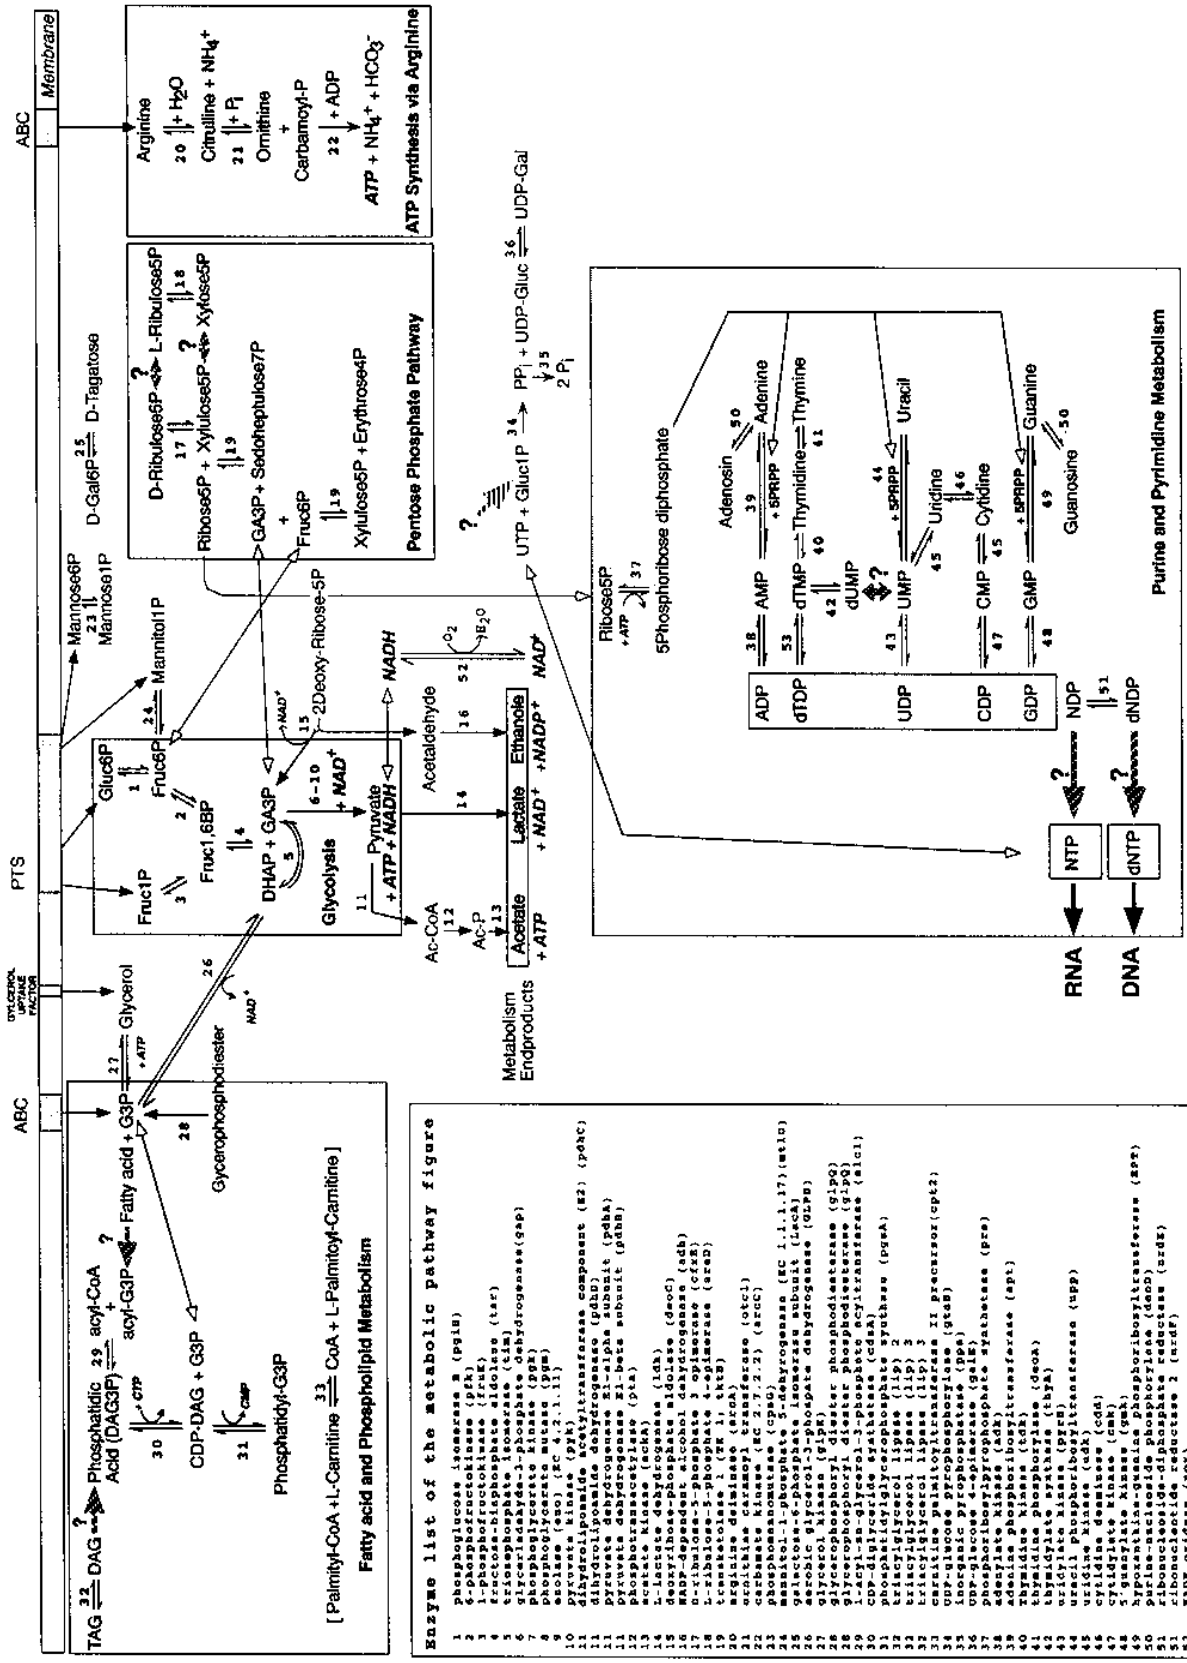

Figure 5. Schematic diagram of the metabolic pathways of *M. pneumoniae* deduced from Table 1. Shaded arrows with question marks indicate missing enzymatic activities.

It is also possible that one or more of the lipoproteins function as substrate-binding proteins.

There is also evidence for bacterial ABC export systems in *M.pneumoniae* (59). For example D12\_orf634 (msbA), D12\_orf623 (pmd1) and D02\_orf660 (lcnDR3) have the conserved ATP binding motif and the membrane-spanning domains on the same polypeptide. In addition D12\_orf623 and D12\_orf634 show also significant similarities to multidrug resistance proteins of different organisms.

Among the proposed PTS transport systems, we identified one for glucose and one for mannitol. They are similar to the homologous systems from several Gram-positive bacteria, with a EIIA and EIIBC domains on two separate polypeptides for the mannitol transport system and with three domains (EIIABC) of enzyme II in one polypeptide for the glucose transport system.

Besides glucose and mannitol, fructose also seems to be imported by the PTS system. According to our data the fructose-permease II component R02\_orf694 (fruA) contains all three domains of enzyme II in one gene (EIIABC). In addition, R02\_orf694 and the 1-phosphofructokinase (fruK, R02\_orf300) are probably in one operon, but we do not find fruF which is also part of the fructose operon in enteric bacteria (58).

### Protein secretion

Both, Gram-positive and Gram-negative bacteria have a well conserved protein translocation system. The components identified which are part of the well characterized *E.coli* system (60) include cytosolic chaperones or regulators [trigger factor, SecB, DnaK, SRP (a ribonucleoprotein composed of 4.5 S RNA and Ffh) and FtsY] which deliver the protein to a membrane receptor (SecA). The receptor is also supposed to function as a motor, pushing the protein across the membrane via specific protein channels (SecY, SecG, SecE, SecD and SecF). The secreted proteins to be transported carry an N-terminal signal peptide which will be removed by a signal peptidase (SPaseI). Two routes of export have been proposed either via SecB and SecA or by SRP. The protein secretion system in *M.pneumoniae* is less complex (Table 1). So far, the trigger factor, DnaK, SRP, FtsY and SecA have been identified. From the channel-forming proteins only SecY is present but SecG, SecF, SecE, SecD and the cytosolic receptor protein SecB are missing. Also absent is the signal peptidase SPaseI although computer-assisted motif prediction programs indicate the presence of corresponding substrates (signal peptides). The simplified protein export system might be a reflection of the fact that *M.pneumoniae* is only surrounded by a cytoplasmic membrane. Another problem concerns refolding of secreted proteins which are normally exported in an unfolded stage. Refolding might be catalyzed by chaperones which have to function on the cell surface (60). This might impose a special problem on the wall-less bacteria in general, since they do not possess a periplasmic space which could prevent proteins from diffusing. To anchor the proposed chaperones on the cell surface as lipoproteins would be a possible way to solve this problem.

### Nucleotide synthesis: purine and pyrimidine salvage pathways

Guanine, guanosine, uracil, thymine, thymidine, cytidine, adenine and adenosine may serve as precursors for nucleic acids and nucleotide coenzymes, as determined in nutritional studies of

*Mollicutes*. These components can be used for the synthesis of ribonucleotides by the salvage pathway as predicted from the enzymes listed (Table 1, Fig. 5). The ribonucleotides are converted to deoxyribonucleotides by ribonucleoside-diphosphate reductase, an enzyme complex formed by the gene products of nrdE (F10\_orf721) and nrdF (F10\_orf339). Adenine, guanine and uracil can be metabolized directly to the corresponding nucleoside monophosphates by the enzymes adenine phosphoribosyltransferase (apt, F11\_orf133), hypoxanthine-guanine phosphoribosyltransferase (hpt, K05\_orf175) and uracil phosphoribosyltransferase (upp, B01\_orf178). Uridylate, adenylate and guanylate kinases catalyze the generation of ADP, GDP and UDP. Surprisingly, we could not find the nucleoside diphosphate kinase (ndk), the key enzyme for the conversion from NDP to NTP. This finding is in agreement with data from the genomic sequence analysis of *M.genitalium*.

Another important enzyme, the CTP synthetase which converts UTP to CTP is also missing. Therefore the only route for the synthesis of CTP appears to be from cytidine to CMP by uridine kinase (H03\_orf213) and to CDP by cytidylate kinase (P01\_orf217). Deoxythymidine monophosphate (dTMP) could be either synthesized by thymidine kinase (tdk, B01\_orf191) or by thymidylate synthase (thA, F10\_orf328).

It will be of special interest to experimentally identify the enzyme(s) of *M.pneumoniae* which convert NDPs to NTPs, since such an enzymatic activity seems to be essential.

### Carbohydrate metabolism and energy conservation

The ability to metabolize glucose and/or arginine and use it for the ATP synthesis is one of the key features in classification of *Mollicutes*. *Mycoplasma pneumoniae* is listed in Bergey's manual of systematic bacteriology as a glucose fermenter but not as an arginine-hydrolyzing species (61). This contrasts with our sequencing results, since the three enzymes involved in the arginine degradation pathway, arginine deiminase (H03\_orf438), ornithine carbamoyltransferase (H10\_orf273) and carbamate kinase (F10\_orf309) are present according to our sequence data. The arginine deiminase gene occurs twice but one copy is inactive due to a raster-mutation resulting in two proposed ORFs (H10\_orf198 and H10\_orf238) corresponding to the N-terminal and C-terminal halves of a complete deiminase. The change in reading frame was also confirmed by sequencing of directly amplified genomic DNA. All these proposed ORFs are organized in an operon-like arrangement except for the deiminase (H03\_orf438) which seems to be expressed as a single gene located far away from the mentioned operon. Included in this operon is a proposed protein (F10\_orf565) with 12 predicted transmembrane domains indicative of a putative permease.

Glucose, fructose and mannitol are transported by the PTS system into the cell and further degraded by the Embden-Meyerhof-Parnas (EMP) pathway to pyruvate. All enzymes required for this pathway have been identified. The second pathway for metabolizing glucose, the pentose phosphate pathway, is incomplete in *M.pneumoniae*. We found only the enzymes ribulose-5-phosphate-3-epimerase and transketolase (Fig. 5). Glucose-6-phosphate dehydrogenase (G6Pde), 6-phospho-gluconate dehydrogenase (6PGde), and a transaldolase are missing. These data agree with enzymatic studies showing that G6Pde and 6PGde are absent in mycoplasmas (62).

Pyruvate can be further metabolized by two alternative reactions, either to lactate by lactate dehydrogenase (K05\_orf312) or to acetyl-CoA by the pyruvate dehydrogenase complex and further to acetate by the phosphotransacetylase (A05\_orf320, pta) and the acetate kinase (G12\_orf390, ackA). The pyruvate dehydrogenase complex consists of E1 $\alpha$  (F11\_orf358a) E1 $\beta$  (F11\_orf327), the two subunits of the pyruvate dehydrogenase, the dihydrolipoamide acetyltransferase E2 (F11\_orf402) and the dihydrolipoamide dehydrogenase E3 (F11\_orf457). The corresponding genes are clustered (nt 549 943–557 431; pcosMPP11); part of this cluster also contains the genes coding for NADH oxidase (nox, F11\_orf479) and lipoate protein ligase (lplA, F11orf339). The later enzyme joins lipoic acid in an amide linkage to the  $\epsilon$  amino group of a lysine residue of the dihydrolipoamide acetyltransferase.

### Membrane phospho- and glycolipid synthesis

In *M.pneumoniae* strain FH the following membrane phospho- and glycolipids have been found: digalactosyldiacylglycerol, trigalactosyldiacylglycerol, glucosylgalactosyldiacylglycerol, phosphatidylglycerol (PG) and diphosphatidylglycerol (DPG) (63). Since *M.pneumoniae* FH and *M.pneumoniae* M129 are very similar we assume that both strains carry essentially the same genes for phospho- and glycolipid-synthesis.

About 10 genes are required for the synthesis of the above-mentioned lipids; but according to our DNA sequence analysis only three of the expected genes could be unambiguously identified. They code (Fig. 5) for the enzymes 1-acylglycerol-3-phosphate acyltransferase (plsC; gene name in *Saccharomyces cerevisiae* is slc1), phosphatidic acid cytidyltransferase (cdsA) and glycerolphosphate phosphatidyltransferase (pgsA). These enzymes are involved in the biochemical pathway for the synthesis of PG and DPG. Missing are the glycerol-3-phosphate acyltransferase (plsB) catalysing the synthesis of 1-acylglycerol-3-phosphate (acyl-G3P) from glycerol-3-phosphate (G3P), the phosphatidylglycerol phosphate phosphatase which converts phosphatidylglycerol-3-phosphate to PG and finally the cardiolipin synthetase (cls) which synthesizes DPG from PG. Interestingly, we find a gene homologous to the plsX gene from *E.coli* which is involved in membrane lipid synthesis in an undefined manner. The glycolipid synthesis could start with phosphatidic acid and would probably require a phosphatidic acid phosphatase and several UDP-glucosyl- or galactosyltransferases. None of these enzymes could be identified by similarity searches in databases.

As expected from biochemical studies no gene involved in fatty acid or cholesterol synthesis was determined in the sequence analysis. These components are incorporated as such from the medium.

An interesting enzyme is the proposed carnitine palmitoyl-transferase encoded by C09\_orf600, which might be involved in the modification of exogenous phosphatidylcholine (67).

### CONCLUSIONS

It is impossible to address each proposed *M.pneumoniae* gene in this paper. We have tried to cover the most important categories of functions and point to genes which should be present, but could not be found by our applied methods. Typical examples are the missing diphosphonucleoside kinase for the conversion of (d)NDPs to (d)NTPs, and the substrate binding domain (oppA) for the oligopeptide ABC transporter. In addition, we could not

find any indication for a number of genes/proteins, which should be there based on experimental evidence. *Mycoplasma pneumoniae* has been shown to be motile and to exhibit chemotactic behaviour (64). Motility genes are difficult to identify since the motility in *M.pneumoniae* is independent of pili or flagella and it is not yet known which are potential candidates. Therefore, any progress in this field depends on the isolation of mutants. Furthermore, none of the components of the chemotactic signal pathway, the Che proteins, which are well conserved among bacteria, or any other 'two-component signal transduction system' could be detected. Chemotactic behaviour in *M.pneumoniae* is difficult to study. While it might be possible that these bacteria are chemotaxis negative, only additional experiments will clarify this point.

It has been reported that *M.pneumoniae* produces hydrogen peroxide considered to be a pathogenicity factor (17). Therefore, to protect itself from oxidative stress one would expect to find the standard enzymes dealing with these stress factors like catalase, superoxide dismutase or peroxidase, but we have no similarity based evidence that these enzymes exist in *M.pneumoniae*. Experimental data on this topic are also inconsistent (62).

The results of our sequence analysis explain quite well the kind of changes which have led to the observed reduction of the genome size in *M.pneumoniae* from the presumed genome size of several million base pairs of the ancestral bacteria. The main cause is the loss of complete anabolic (no amino acid synthesis) and metabolic pathways and of genes for the synthesis of complex structures like the bacterial cell wall which requires a large number of genes. In addition, for several processes like DNA repair, DNA recombination, cell division or protein secretion, the number of genes involved is smaller than in the more complex bacteria.

No significant changes were observed in the size of individual genes which resemble more or less their counterparts in *E.coli* or *B.subtilis*. The occasionally observed smaller intergenic regions, like those found in the ATPase operon, do not appear to significantly contribute to the overall genome size reduction.

In contrast with the loss of complete pathways we frequently observed the amplification of complete genes or segments of genes (see sections on lipoprotein families or on the repetitive DNA sequences RepMP2/3, RepMP4 and RepMP5). In these two instances the obvious advantage would be the potential of expressing antigenic variants of surface-exposed proteins.

The various truncated genes which are also present in full length copies e.g. arginine deiminase (H03\_orf438 and H03\_orf238), DNA primase (H91\_orf620 and D12\_orf212) and the dihydrofolate reductase (H10\_orf506 and F10\_orf160) might be relics of recombination events which took place in the course of the process of evolution.

Finally among the many proposed proteins are a few which share the highest similarity over their entire length with a eukaryotic protein. The most prominent examples are the pre-B cell enhancing factor (pbeF, D09\_orf451) and the carnitine palmitoyltransferase II precursor (cpt2, C09\_orf600). Both might be candidates for examples of horizontal gene transfer, but at the present state of analysis a definitive answer cannot be given.

It will be the main task of future studies to reconcile the experimental evidence and the DNA sequence-based predictions, i.e. to identify the genes for observed functions and vice versa, and to assign functions to proposed open reading frames with hitherto unknown functions.



One obvious topic is the comparative analysis between the completely sequenced genomes of the closely related species *M.pneumoniae* and *M.genitalium* (9). Since the present paper is already very voluminous we decided to publish this analysis in an additional paper (Himmelreich *et al.*, in preparation).

## ACKNOWLEDGEMENTS

We thank R. Frank and A. Bosserhoff for the synthesis of oligonucleotides, B. Reiner for her expertise in computer data analysis, Raphael Mosbach for his technical assistance concerning hardware problems, U. Leibfried for technical assistance, I. Schmidt for preparing the manuscript, D. Hofmann and H. Göhlmann for reading of the manuscript and H. Schaller for financial assistance and his encouragement throughout our work. We thank S. Razin, A. Wieslander, K. Dybvig, K. Sitaraman, R. Walker, H. Neimark and R. Miles who read drafts of this publication. Their corrections, critical comments and suggestions helped us very much. This research was supported by a grant from the Deutsche Forschungsgemeinschaft (He 780/5-1–He 780/5-4) and by the Fonds der Chemischen Industrie.

## REFERENCES

- Chanock, R. M., Dienes, L., Eaton, M. D., Edward, D. G., Freundt, E. A., Hayflick, L., Hers, J. F. P., Jensen, K. E., Liu, C., Marmion, B. P., Morton, H. E., Mufson, M. A., Smith, P. F., Somerson, N. L. and Taylor-Robinson, D. (1963) *Science*, **140**, 662.
- Krause, D. C. (1996) *Mol. Microbiol.*, **20**, 247–253.
- Jacobs, E. (1991) *Rev. Med. Microbiol.*, **2**, 83–90.
- Dybvig, K. (1990) *Annu. Rev. Microbiol.*, **44**, 81–104.
- Morowitz, H. J. (1984) *Isr. J. Med. Sci.*, **20**, 750–753.
- Razin, S. (1992) *FEMS Microbiol Lett*, **100**, 423–431.
- Bove, J. M. (1993) *Clin. Infect. Dis.*, **17 Suppl 1**, 10–31
- Peterson, S. N., Hu, P. C., Bott, K. F. and Hutchison, C. A. d. (1993) *J. Bacteriol.*, **175**, 7918–7930
- Fraser, C. M., Gocayne, J. D., White, O., Adams, M. D., Clayton, R. A., Fleischmann, R. D., Bult, C. J., Kerlavage, A. R., Sutton, G., Kelley, J. M. *et al.* (1995) *Science*, **270**, 397–403.
- Hilbert, H., Himmelreich, R., Plagens, H. and Herrmann, R. (1996) *Nucleic Acids Res.*, **24**, 628–639.
- Bork, P., Ouzounis, C., Casari, G., Schneider, R., Sander, C., Dolan, M., Gilbert, W. and Gillet, P. M. (1995) *Mol. Microbiol.*, **16**, 955–967
- Sterky, F., Holmberg, A. and Uhlen, M. (1996) HUGO'96, Heidelberg, Germany.
- Glass, J. L., Glass, J. S., Lefkowitz, E. J., Chen, E. Y. and Cassel, G. H. (1996) IOM Letters, USA, Vol. 4, pp. 12., Proc. Meet. Int. Org. Mycoplasma., Orlando, Florida.
- Inamine, J. M., Loechel, S. and Hu, P. C. (1988) *Gene*, **73**, 175–183.
- Wenzel, R. and Herrmann, R. (1989) *Nucleic Acids Res.*, **17**, 7029–7043.
- Su, C. J., Chavoya, A. and Baseman, J. B. (1988) *Infect Immunol.*, **56**, 3157–3161.
- Almagor, M., Yatziv, S. and Kahane, I. (1983) *Infect. Immunol.*, **41**, 251–256.
- Sanger, F., Nicklen, R. and Coulson, A. R. (1977) *Proc. Natl Acad. Sci. USA*, **79**, 5463–5467.
- Bairoch, A. and Boeckmann, B. (1991) *Nucleic Acids Res.*, **19**, 2247–2249.
- Barker, W. C., George, D. G., Mewes, H.-W., Pfeiffer, F. and Tsugita, A. (1993) *Nucleic Acids Res.*, **21**, 3089–3092.
- Pearson, W. R. and Lipman, D. J. (1988) *Proc. Natl Acad. Sci. USA*, **85**, 2444–2448.
- Altschul, S., Gish, W., Miller, W., Myers, E. and Lipman, D. (1990) *J. Mol. Biol.*, **215**, 403–410.
- Bairoch, A. (1992) *Nucleic Acids Res.*, **20**, 2013–2018.
- Inamine, J. M., Ho, K. C., Loechel, S. and Hu, P. C. (1990) *J. Bacteriol.*, **172**, 504–506.
- Nakai, K. and Kanehisa, M. (1991) *Proteins: Struct., Funct. Genet.*, **11**, 95–110.
- Proft, T. and Herrmann, R. (1994) *Mol. Microbiol.*, **13**, 337–348.
- Proft, T., Hilbert, H., Layh Schmitt, G. and Herrmann, R. (1995) *J. Bacteriol.*, **177**, 3370–3378.
- Razin, S. and Jacobs, E. (1992b) *J. Gen. Microbiol.*, **138**, 407–422.
- Ruland, K., Wenzel, R. and Herrmann, R. (1990) *Nucleic Acids Res.*, **18**, 6311–6317.
- Fleischmann, R. D., Adams, M. D., White, O., Clayton, R. A., Kirkness, E. F., Kerlavage, A. R., Bult, C. J., Tomb, J. F., Dougherty, B. A., Merrick, J. M. *et al.* (1995) *Science*, **269**, 496–512.
- Riley, M. (1993) *Microbiol. Rev.*, **57**, 862–952.
- Baker, T. A. and Wickner, S. H. (1992) *Annu. Rev. Genet.*, **26**, 447–477.
- Mills, L. B., Stanbridge, E. J., Sedwick, W. D. and Korn, D. (1977) *J. Bacteriol.*, **132**, 641–649.
- Barnes, M. H., Tarantino, P. M., Jr., Spacciapoli, P., Brown, N. C., Yu, H. and Dybvig, K. (1994) *Mol. Microbiol.*, **13**, 843–854
- Koonin, E. V. and Bork, P. (1996) *Trends Biochem. Sci.*, **21**, 128–129.
- Camerini-Otero, R. D. and Hsieh, P. (1995) *Annu. Rev. Genet.*, **29**, 509–552.
- Demple, B. and Harrison, L. (1994) *Annu. Rev. Biochem.*, **63**, 915–948.
- Sancar, A. and Sancar, G. B. (1988) *Annu. Rev. Biochem.*, **57**, 29–67.
- Haldenwang, W. G. (1995) *Microbiol. Rev.*, **59**, 1–30
- Hyman, H. C., Gafny, R., Glaser, G. and Razin, S. (1988) *J. Bacteriol.*, **170**, 3262–3268.
- Moran, C. P. j., Lang, N., LeGrice, S. F. J., Lee, G., Stephens, M., Sonnenshein, A. L., Pero, J. and Losik, R. (1982) *Mol. Gen. Genet.*, **186**, 339–346.
- Das, A. (1993) *Annu. Rev. Biochem.*, **62**, 893–930.
- Hecker, M., Schumann, W. and Voelker, U. (1996) *Mol. Microbiol.*, **19**, 417–428.
- Parkinson, J. S. (1993) *Cell*, **73**, 857–871.
- Simoneau, P., Li, C. M., Loechel, S., Wenzel, R., Herrmann, R. and Hu, P. C. (1993) *Nucleic Acids Res.*, **21**, 4967–4974.
- Breton, R., Watson, D., Yaguchi, M. and Lapointe, J. (1990) *J. Biol. Chem.*, **265**, 18248–18255.
- Shine, J. and Dalgarno, L. (1974) *Proc. Natl. Acad. Sci. USA*, **71**, 1342–1346.
- Shapiro, L. (1993) *Cell*, **73**, 841–855.
- Proft, T., Hilbert, H., Plagens, H. and Herrmann, R. (1996) *Gene*, **171**, 79–82.
- Kahane, I., Tucker, S., Leith, D. K., Morrison, P. J. and Baseman, J. B. (1985) *Infect. Immunol.*, **50**, 944–946.
- Su, C. J., Chavoya, A., Dallo, S. F. and Baseman, J. B. (1990) *Infect. Immunol.*, **58**, 2669–2674.
- Ruland, K., Himmelreich, R. and Herrmann, R. (1994) *J. Bacteriol.*, **176**, 5202–5209
- Vicente, M. and Errington, J. (1996) *Mol. Microbiol.*, **20**, 1–7.
- Sankaran, K., Gupta, S. D. and Wu, H. C. (1995) *Methods Enzymol.*, **250**, 683–697
- Gilson, E., Alloing, G., Schmidt, T., Claverys, J. P., Dudler, R. and Hofnung, M. (1988) *EMBO J.*, **7**, 3971–3974.
- Citti, C. and Wise, K. S. (1995) *Mol. Microbiol.*, **18**, 649–660.
- Higgins, C. F. (1992) *Annu. Rev. Cell Biol.*, **8**, 67–113.
- Postma, P. W., Lengeler, J. W. and Jacobson, G. R. (1993) *Microbiol. Rev.*, **57**, 543–594
- Fath, M. J. and Kolter, R. (1993) *Microbiol. Rev.*, **57**, 995–1017.
- Schatz, G. and Dobberstein, B. (1996) *Science*, **271**, 1519–1526
- Freundt, E. A. and Razin, S. (1984) In Krieg, N. R. and Holt, J. G. e. (eds), *Bergey's Manual of Systematic Bacteriology*, Vol. 1. Williams and Wilkins, Baltimore, pp. 742–770.
- Pollack, J. D. (1992) In Maniloff, J., McElhaney, R. N., Finch, L. R. and Baseman, J. B. e. (eds), *Mycoplasmas—Molecular Biology and Pathogenesis*. American Society for Microbiology, Washington, DC, pp. 181–200.
- Plackett, P., Marmion, B. P., Shaw, E. J. and Lemke, R. M. (1969) *Aust. J. Exp. Biol. Med. Sci.*, **47**, 171–195.
- Kirchhoff, H. (1992) In Maniloff, J., McElhaney, R. N., Finch, L. R. and Baseman, J. B. e. (eds), *Mycoplasmas—Molecular Biology and Pathogenesis*. American Society for Microbiology, Washington, DC, pp. 289–308.
- Matic, I., Rayssiguier, C. and Radman M. (1995) *Cell*, **80**, 507–515.
- Atkins, J. F. and Gesteland, R. F. (1996) *Nature*, **379**, 769–771
- Rottem, S., Adar, L., Gross, Z., Ne'Eman, Z. and Davis, P. J. (1986) *J. Bacteriol.*, **167**, 299–304.
